# Supplementary material for: Rh( iii )-catalyzed heteroannular-selective heteroarylation of biaryls: facile access to heteroacenes with sulfur-embedded 5–7 ring topology
Source: Royal Society of Chemistry journal article supplement (doi:10.1039/d5sc08209a), 2026-01-01

## *Supporting Information*

### **Rh(III)-Catalyzed heteroannular-selective heteroarylation of biaryls: facile access to heteroacenes with sulfur-embedded 5-7 ring topology**

Zhanhui He<sup>a</sup>, Li Yang<sup>a</sup>, Menghang Zhou<sup>a</sup>, Yue Zhong<sup>a</sup>, Zheng Liu<sup>a,b,\*</sup>, Ziao Zhang<sup>a</sup>, Feiyang Xia<sup>a</sup>,

Xuezhe Deng<sup>a</sup>, Shuang Yan<sup>b</sup>, Cheng Xu<sup>a</sup>, Cheng Zhang<sup>c,\*</sup>, Guodong Yin<sup>a,\*</sup>

<sup>a</sup>Hubei Key Laboratory of Pollutant Analysis and Reuse Technology, College of Chemistry and  
Chemical Engineering, Hubei Normal University, Huangshi 435002, P.R. China

<sup>b</sup>Medical Imaging Key Laboratory of Sichuan Province, North Sichuan Medical College, Nanchong  
637000, P.R. China

<sup>c</sup>Key Laboratory of Green Chemistry and Technology of Ministry of Education, College of Chemistry,  
Sichuan University, 29 Wangjiang Road, Chengdu 610064, P.R. China

## **Table of Contents**

|                                                                                         |           |
|-----------------------------------------------------------------------------------------|-----------|
| <b>I. General remarks.....</b>                                                          | <b>1</b>  |
| <b>II. Synthesis of thioether- and selenoether-substituted biaryls.....</b>             | <b>2</b>  |
| <b>III. Optimization of heteroannular-selective heteroarylation of biaryls.....</b>     | <b>5</b>  |
| <b>IV. Rh(III)-Catalyzed heteroannular-selective heteroarylation of biaryls.....</b>    | <b>8</b>  |
| <b>V. Scale-up synthesis.....</b>                                                       | <b>29</b> |
| <b>VI. General procedure for the recovery experiment of Ag salt.....</b>                | <b>30</b> |
| <b>VII. Mechanistic study.....</b>                                                      | <b>31</b> |
| <b>VIII. Synthetic applications.....</b>                                                | <b>38</b> |
| <b>IX. Photophysical properties.....</b>                                                | <b>41</b> |
| <b>X. Single crystal X-ray structure and crystallographic data.....</b>                 | <b>47</b> |
| <b>XI. Theoretical calculations.....</b>                                                | <b>56</b> |
| <b>XII. References.....</b>                                                             | <b>60</b> |
| <b>XIII. Copies of <sup>1</sup>H and <sup>13</sup>C{<sup>1</sup>H} NMR spectra.....</b> | <b>61</b> |

## I. General remarks

NMR spectra were recorded on Bruker Avance III<sup>TM</sup> 300 MHz NMR spectrometers. The <sup>1</sup>H NMR (300 MHz) chemical shifts were measured relative to CDCl<sub>3</sub> or DMSO-*d*<sub>6</sub> as the internal reference (DMSO-*d*<sub>6</sub>:  $\delta$  = 2.50 ppm; CDCl<sub>3</sub>:  $\delta$  = 7.26 ppm). The <sup>13</sup>C NMR (75 MHz) chemical shifts were given using CDCl<sub>3</sub> or DMSO-*d*<sub>6</sub> as the internal standard (DMSO-*d*<sub>6</sub>:  $\delta$  = 39.52 ppm; CDCl<sub>3</sub>:  $\delta$  = 77.16 ppm). High-resolution mass spectra (HRMS) were obtained with a Shimadzu LCMS-ITTOF (ESI). The X-ray crystal structure determination was performed using a Bruker SMART APEX CCD system. The UV-vis absorption data were determined on a METASH UV spectrometer, and the PL emission data were determined on a Shimadzu RF-6000 fluorescence spectrometer.

All reagents were obtained from commercial suppliers and used without further purification unless otherwise stated. Phenylboronic acid derivatives and 2-bromothioanisole were purchased from Shanghai Bide Pharmaceutical Technology Co., Ltd., RhCl<sub>3</sub> and 1,2,3,4,5-pentamethylcyclopentadiene were purchased from Shanxi Kaida Chemical Engineering (China) CO., Ltd., Cp<sup>\*</sup>Rh(MeCN)<sub>3</sub>[SbF<sub>6</sub>]<sub>2</sub> was prepared according to literature methods,<sup>[1]</sup> *n*-Butyllithium, solvents and inorganic salt were purchased from Shanghai Energy Chemical Co., Ltd. Thioether- and selenoether-substituted biaryls were prepared according to the literatures.<sup>[2-5]</sup>

## II. Synthesis of thioether- and selenoether-substituted biaryls

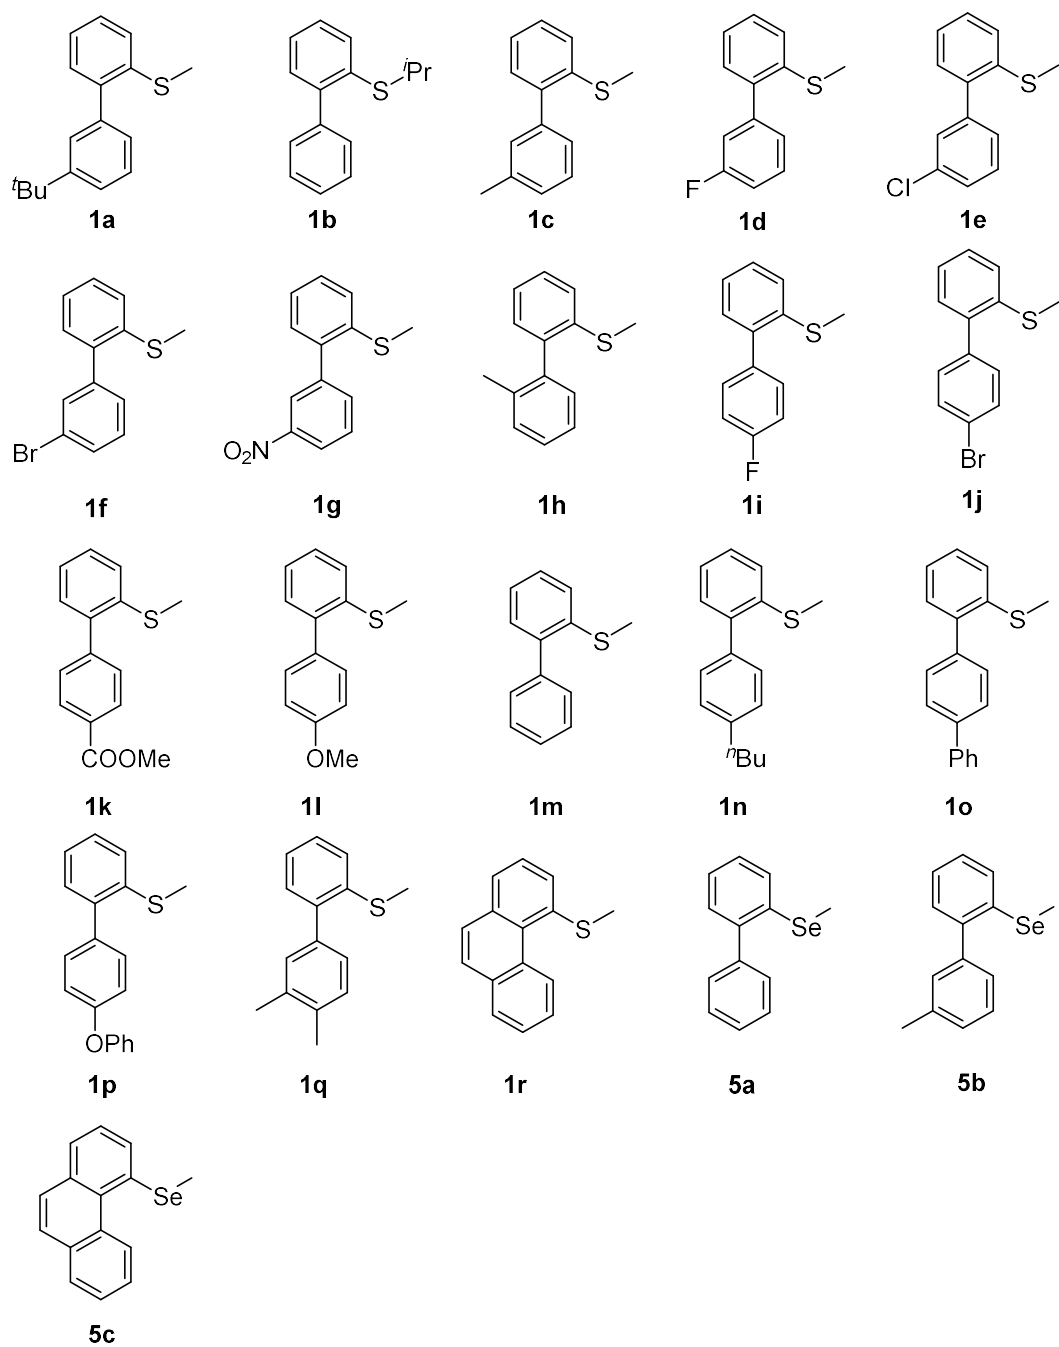

**Scheme S1** List of thioether- and selenoether-substituted biaryls.





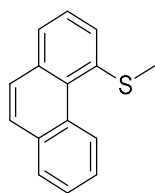

### Methyl(phenanthren-4-yl)sulfane (1r)

To a 100 mL two-neck round-bottom flask was added 4-bromophenanthrene<sup>[5]</sup> (5.0 mmol, 1.0 equiv) and THF (40 mL). The solution was cooled to -78 °C and <sup>n</sup>BuLi (2.5 mol/L in THF, 5.5 mmol, 1.1 equiv) was added dropwise. After stirring for 0.5 hours at the temperature, dimethyl disulfide (5.5 mmol, 1.1 equiv) in THF (5 mL) was added. The mixture was stirred at room temperature overnight, and then saturated aqueous NH<sub>4</sub>Cl solution was added. The organic layer was separated, washed with distilled water and aqueous NaHCO<sub>3</sub> solution, dried over Na<sub>2</sub>SO<sub>4</sub>, and concentrated in vacuo, the residue was purified by flash column chromatography to afford the desired product. Product obtained as a yellow liquid (0.84 g, 75% yield). <sup>1</sup>H NMR (300 MHz, CDCl<sub>3</sub>): δ = 9.48 (d, *J* = 8.4 Hz, 1H), 7.69 (d, *J* = 7.5 Hz, 1H), 7.53-7.38 (m, 6H), 7.29 (t, *J* = 7.5 Hz, 1H), 2.35 (s, 3H) ppm; <sup>13</sup>C {<sup>1</sup>H} NMR (75 MHz, CDCl<sub>3</sub>): δ = 136.8, 134.0, 133.3, 130.5, 129.5, 128.4, 128.1, 127.7, 126.7, 126.6, 126.4, 125.9, 125.6, 18.8 ppm. HRMS (ESI<sup>+</sup>): calcd for C<sub>15</sub>H<sub>13</sub>S<sup>+</sup>: [M+H]<sup>+</sup>, 225.0733, found: 225.0738.

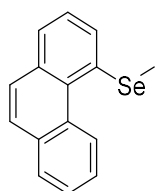

### Methyl(phenanthren-4-yl)selane (5c)

To a 100 mL two-neck round-bottom flask was added 4-bromophenanthrene (5.0 mmol, 1.0 equiv) and THF (40 mL). The solution was cooled to -78 °C and <sup>n</sup>BuLi (2.5 mol/L in THF, 5.5 mmol, 1.1 equiv) was added dropwise. After stirring for 0.5 hours at the temperature, dimethyl diselenide (5.5 mmol, 1.1 equiv) in THF (5 mL) was added. The mixture was stirred at room temperature overnight, and then saturated aqueous NH<sub>4</sub>Cl solution was added. The organic layer was separated, washed with distilled water and aqueous NaHCO<sub>3</sub> solution, dried over Na<sub>2</sub>SO<sub>4</sub>, and concentrated in vacuo, the residue was purified by flash column chromatography to afford the desired product. Product

obtained as a yellow liquid (1.03 g, 76% yield).  $^1\text{H}$  NMR (300 MHz,  $\text{CDCl}_3$ ):  $\delta$  = 9.22 (d,  $J$  = 8.4 Hz, 1H), 7.95 (d,  $J$  = 8.7 Hz, 1H), 7.69-7.68 (m, 6H), 7.52 (t,  $J$  = 7.5 Hz, 1H), 2.46 (s, 3H) ppm;  $^{13}\text{C}\{^1\text{H}\}$  NMR (75 MHz,  $\text{CDCl}_3$ ):  $\delta$  = 133.9, 133.3, 131.4, 130.9, 130.7, 129.2, 128.4, 127.6, 127.5, 127.4, 126.9, 126.6, 126.3, 125.4, 10.8 ppm. HRMS (ESI $^+$ ): calcd for  $\text{C}_{15}\text{H}_{12}\text{SeK}^+$ :  $[\text{M}+\text{K}]^+$ , 310.9736, found: 310.9741.

### III. Optimization of heteroannular-selective heteroarylation of biaryls

A 25 mL Schlenk tube with a magnetic stir bar was charged with (3'-(*tert*-butyl)-[1,1'-biphenyl]-2-yl)(methyl)sulfane (**1a**, 0.2 mmol), benzo[*b*]thiophene (**2a**, 0.6 mmol), Catalyst, Oxidant, Additive and Solvent (1.0 mL) under  $\text{N}_2$  atmosphere. The resulting mixture was stirred at 120 °C for 24 h and then diluted with 10 mL of  $\text{CH}_2\text{Cl}_2$ . The solution was filtered through a celite pad and washed with 10-25 mL of  $\text{CH}_2\text{Cl}_2$ . The filtrate was concentrated under vacuum and the residue was purified by column chromatography on Silica gel column (Petroleum ether/ $\text{CH}_2\text{Cl}_2$  = 10/1, v/v) to provide the desired product.

**Table S1** The screening of solvent.

| Entry | Solvent                  | Yield <sup>[a]</sup> | Entry | Solvent       | Yield <sup>[a]</sup> |
|-------|--------------------------|----------------------|-------|---------------|----------------------|
| 1     | THF                      | 35                   | 6     | DMF           | Trace                |
| 2     | 1,4-dioxane              | 28                   | 7     | DMSO          | N.D.                 |
| 3     | Toluene                  | Trace                | 8     | TFE           | 26                   |
| 4     | PhCl                     | 32                   | 9     | <i>t</i> BuOH | 32                   |
| 5     | DCE                      | 41                   | 10    | TFE           | 26                   |
| 6     | $\text{CH}_2\text{Cl}_2$ | 28                   | 12    | HFIP          | Trace                |

Reaction conditions: **1a** (0.2 mmol, 1.0 equiv), **2a** (0.6 mmol, 3.0 equiv),  $[\text{Cp}^*\text{RhCl}_2]_2$  (2.5 mol%),  $\text{AgSbF}_6$  (10.0 mol%),  $\text{Ag}_2\text{O}$  (0.4 mmol, 2.0 equiv) and  $\text{PivOH}$  (0.2 mmol,

1.0 equiv) in Solvent (1.0 mL) at 120 °C for 24 h under N<sub>2</sub> atmosphere. N.D.: not detected. [a]. Yield of isolated products.

**Table S2** The screening of catalyst.

| Entry | Catalyst                                                 | Yield <sup>[a]</sup> | Entry                   | Catalyst                                                    | Yield <sup>[a]</sup> |
|-------|----------------------------------------------------------|----------------------|-------------------------|-------------------------------------------------------------|----------------------|
| 1     | —                                                        | N.D.                 | 8                       | RhCl <sub>3</sub> ·3H <sub>2</sub> O                        | 23                   |
| 2     | CuI                                                      | N.D.                 | 9                       | [Cp*RhCl <sub>2</sub> ] <sub>2</sub> /AgSbF <sub>6</sub>    | 41                   |
| 3     | [Ru( <i>p</i> -cymene)Cl <sub>2</sub> ] <sub>2</sub>     | trace                | 10                      | [Cp*RhCl <sub>2</sub> ] <sub>2</sub> /AgBF <sub>4</sub>     | 34                   |
| 4     | Pd(OAc) <sub>2</sub>                                     | 27                   | 11                      | [Cp*RhCl <sub>2</sub> ] <sub>2</sub> /AgOTf                 | 34                   |
| 5     | [Cp*IrCl <sub>2</sub> ] <sub>2</sub> /AgSbF <sub>6</sub> | 18                   | 15 <sup>[b]</sup>       | Cp*Rh(MeCN) <sub>3</sub> [SbF <sub>6</sub> ] <sub>2</sub>   | 48                   |
| 6     | [Rh(coe) <sub>2</sub> Cl] <sub>2</sub>                   | 31                   | <b>13<sup>[c]</sup></b> | <b>Cp*Rh(MeCN)<sub>3</sub>[SbF<sub>6</sub>]<sub>2</sub></b> | <b>59</b>            |
| 7     | [Cp*RhCl <sub>2</sub> ] <sub>2</sub>                     | 32                   | 14 <sup>[d]</sup>       | Cp*Rh(MeCN) <sub>3</sub> [SbF <sub>6</sub> ] <sub>2</sub>   | 40                   |

Reaction conditions: **1a** (0.2 mmol, 1.0 equiv), **2a** (0.6 mmol, 3.0 equiv), Catalyst (5 mol%), Ag<sub>2</sub>O (0.4 mmol, 2.0 equiv) and PivOH (0.2 mmol, 1.0 equiv) in DCE (1.0 mL) at 120 °C for 24 h under N<sub>2</sub> atmosphere. N.D.: not detected. [a]. Yield of isolated products. [b]. Cp\*Rh(MeCN)<sub>3</sub>[SbF<sub>6</sub>]<sub>2</sub> (5.0 mol%) was used, [c]. Cp\*Rh(MeCN)<sub>3</sub>[SbF<sub>6</sub>]<sub>2</sub> (3.0 mol%) was used, [d]. Cp\*Rh(MeCN)<sub>3</sub>[SbF<sub>6</sub>]<sub>2</sub> (1.0 mol%) was used.

**Table S3** The screening of oxidant.

| Entry | Oxidant                                      | Yield <sup>[a]</sup> | Entry | Oxidant                         | Yield <sup>[a]</sup> |
|-------|----------------------------------------------|----------------------|-------|---------------------------------|----------------------|
| 1     | —                                            | N.D.                 | 7     | Ag <sub>2</sub> CO <sub>3</sub> | 51                   |
| 2     | K <sub>2</sub> S <sub>2</sub> O <sub>8</sub> | N.D.                 | 8     | AgOAc                           | 43                   |
| 3     | 1,4-BQ                                       | N.D.                 | 9     | AgOTFA                          | Trace                |
| 4     | PhI(OAc) <sub>2</sub>                        | Trace                | 10    | AgF                             | 48                   |

|   |                                        |       |                         |                        |           |
|---|----------------------------------------|-------|-------------------------|------------------------|-----------|
| 5 | Cu(OAc) <sub>2</sub> ·H <sub>2</sub> O | Trace | 11 <sup>[b]</sup>       | Ag <sub>2</sub> O      | 62        |
| 6 | Ag <sub>2</sub> O                      | 59    | <b>12<sup>[c]</sup></b> | <b>Ag<sub>2</sub>O</b> | <b>68</b> |

Reaction conditions: **1a** (0.2 mmol, 1.0 equiv), **2a** (0.6 mmol, 3.0 equiv), Cp\*Rh(MeCN)<sub>3</sub>[SbF<sub>6</sub>]<sub>2</sub> (3.0 mol%), Oxidant (0.4 mmol, 2.0 equiv) and PivOH (0.2 mmol, 1.0 equiv) in DCE (1.0 mL) at 120 °C for 24 h under N<sub>2</sub> atmosphere. N.D.: not detected. [a]. Yield of isolated products. [b]. Ag<sub>2</sub>O (0.5 mmol, 2.5 equiv) was used. [c]. Ag<sub>2</sub>O (0.7 mmol, 3.5 equiv) was used.

**Table S4** The screening of additive.

| Entry | Additive                        | Yield <sup>[a]</sup> | Entry                   | Additive     | Yield <sup>[a]</sup> |
|-------|---------------------------------|----------------------|-------------------------|--------------|----------------------|
| 1     | —                               | Trace                | 6                       | HOAc         | 42                   |
| 2     | K <sub>2</sub> CO <sub>3</sub>  | N.D.                 | 7                       | TfOH         | 38                   |
| 3     | NaOAc                           | 29                   | 8                       | MesCOOH      | 45                   |
| 4     | K <sub>2</sub> HPO <sub>4</sub> | N.D.                 | 9                       | AdCOOH       | 46                   |
| 5     | DBU                             | N.D.                 | <b>10<sup>[b]</sup></b> | <b>PivOH</b> | <b>76</b>            |

Reaction conditions: **1a** (0.2 mmol, 1.0 equiv), **2a** (0.6 mmol, 3.0 equiv), Cp\*Rh(MeCN)<sub>3</sub>[SbF<sub>6</sub>]<sub>2</sub> (3.0 mol%), Ag<sub>2</sub>O (0.7 mmol, 3.5 equiv) and Additive (0.2 mmol, 1.0 equiv) in DCE (1.0 mL) at 120 °C for 24 h under N<sub>2</sub> atmosphere. N.D.: not detected. [a]. Yield of isolated products. [b]. PivOH (2.0 equiv) was used.

**Table S5** The screening of reaction time and temperature.

| Entry    | Temperature | Time      | Yield <sup>[a]</sup> | Entry            | Temperature | Time | Yield <sup>[a]</sup> |
|----------|-------------|-----------|----------------------|------------------|-------------|------|----------------------|
| 1        | 110         | 24        | 68                   | 6                | 120         | 30   | 73                   |
| <b>2</b> | <b>120</b>  | <b>24</b> | <b>76</b>            | 7 <sup>[b]</sup> | 120         | 24   | 69                   |
| 3        | 130         | 24        | 68                   | 8 <sup>[c]</sup> | 120         | 24   | 59                   |

|   |     |    |    |                   |     |    |    |
|---|-----|----|----|-------------------|-----|----|----|
| 4 | 140 | 24 | 56 | 9 <sup>[d]</sup>  | 120 | 24 | 71 |
| 5 | 120 | 18 | 62 | 10 <sup>[e]</sup> | 120 | 24 | 64 |

Reaction conditions: **1a** (0.2 mmol, 1.0 equiv), **2a** (0.6 mmol, 3.0 equiv), Cp\*Rh(MeCN)<sub>3</sub>[SbF<sub>6</sub>]<sub>2</sub> (3.0 mol%), Ag<sub>2</sub>O (0.7 mmol, 3.5 equiv) and PivOH (0.4 mmol, 2.0 equiv) in DCE (1.0 mL) under N<sub>2</sub> atmosphere. [a]. Yield of isolated products. [b]. **2a** (0.5 mmol, 2.5 equiv) was used. [c]. **2a** (0.4 mmol, 2.0 equiv) was used. [d]. Ag<sub>2</sub>O (0.6 mmol, 3.0 equiv) was used. [e]. Ag<sub>2</sub>O (0.5 mmol, 2.5 equiv) was used.

#### IV. Rh(III)-Catalyzed heteroannular-selective heteroarylation of biaryls

A 25 mL Schlenk tube with a magnetic stir bar was charged with (3'-(*tert*-butyl)-[1,1'-biphenyl]-2-yl)(methyl)sulfane **1a** (0.2 mmol, 1.0 equiv), heteroarenes **2** (0.6 mmol, 3.0 equiv), (Cp\*Rh(MeCN)<sub>3</sub>[SbF<sub>6</sub>]<sub>2</sub>) (5.3 mg, 3 mol%), Ag<sub>2</sub>O (162.2 mg, 0.7 mmol), PivOH (40.8 mg, 0.4 mmol) and DCE (1.0 mL) under N<sub>2</sub> atmosphere. The resulting mixture was stirred at 120 °C for 24 h and then diluted with 10 mL of CH<sub>2</sub>Cl<sub>2</sub>. The solution was filtered through a celite pad and washed with 10-25 mL of CH<sub>2</sub>Cl<sub>2</sub>. The filtrate was concentrated under vacuum and the residue was purified by column chromatography on silica gel to provide the desired product **3**, **4** or **6**.

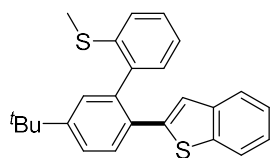

##### 2-(5-(*tert*-Butyl)-2'-(methylthio)-[1,1'-biphenyl]-2-yl)benzo[*b*]thiophene (**3a**)

Purification by column chromatography on silica gel (Petroleum ether/CH<sub>2</sub>Cl<sub>2</sub> = 15/1, v/v) afforded the desired product **3a** as a yellow solid (59.1 mg, 76%). <sup>1</sup>H NMR (300 MHz, CDCl<sub>3</sub>): δ = 7.70-7.65 (m, 2H), 7.58-7.55 (m, 1H), 7.48 (dd, *J*<sub>1</sub> = 8.1 Hz, *J*<sub>2</sub> = 2.1 Hz, 1H), 7.36-7.31 (m, 2H), 7.23-7.29 (m, 5H), 6.91 (s, 1H), 2.31 (s, 3H), 1.38 (s, 9H) ppm; <sup>13</sup>C{<sup>1</sup>H} NMR (75 MHz, CDCl<sub>3</sub>): δ = 151.0, 143.5, 140.4, 140.3, 140.2, 138.7, 138.5, 130.8, 130.7, 129.9, 128.7, 128.4, 125.3, 125.2, 124.7, 124.0, 123.8, 123.5, 122.5, 122.0, 34.9, 31.4, 16.0 ppm. HRMS (ESI<sup>+</sup>): calcd for C<sub>25</sub>H<sub>25</sub>S<sub>2</sub><sup>+</sup>: [M+H]<sup>+</sup> 389.1393, found: 389.1392.

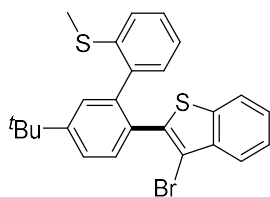

**3-Bromo-2-(5-(*tert*-butyl)-2'-(methylthio)-[1,1'-biphenyl]-2-yl)benzo[*b*]thiophene (3b)**

Purification by column chromatography on silica gel (Petroleum ether/CH<sub>2</sub>Cl<sub>2</sub> = 10/1, v/v) afforded the desired product **3b** as a yellow solid (37.4 mg, 40%). <sup>1</sup>H NMR (300 MHz, CDCl<sub>3</sub>):  $\delta$  = 7.77 (d, *J* = 8.1 Hz, 1H), 7.63-7.56 (m, 2H), 7.52-7.48 (m, 2H), 7.40 (d, *J* = 8.1 Hz, 1H), 7.34 (d, *J* = 13.8 Hz, 1H), 7.29-7.26 (m, 1H), 7.21-7.19 (m, 2H), 7.08 (d, *J* = 6.9 Hz, 1H), 7.02-6.95 (m, 1H), 2.37 (s, 3H), 1.40 (s, 9H) ppm; <sup>13</sup>C{<sup>1</sup>H} NMR (75 MHz, CDCl<sub>3</sub>):  $\delta$  = 151.8, 140.1, 139.8, 138.9, 138.6, 138.4, 138.3, 131.8, 130.6, 129.2, 128.6, 128.1, 127.9, 125.3, 125.0, 124.8, 124.4, 123.4, 122.2, 107.3, 35.0, 31.4, 16.3 ppm. HRMS (ESI<sup>+</sup>): calcd for C<sub>25</sub>H<sub>24</sub><sup>79</sup>BrS<sub>2</sub><sup>+</sup>: [M+H]<sup>+</sup>, 467.0498, found: 467.0500; HRMS (ESI<sup>+</sup>): calcd for C<sub>25</sub>H<sub>24</sub><sup>81</sup>BrS<sub>2</sub><sup>+</sup>: [M+H]<sup>+</sup>, 469.0477, found: 469.0471.

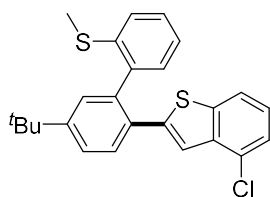

**2-(5-(*tert*-Butyl)-2'-(methylthio)-[1,1'-biphenyl]-2-yl)-4-chlorobenzo[*b*]thiophene (3c)**

Purification by column chromatography on silica gel (Petroleum ether/CH<sub>2</sub>Cl<sub>2</sub> = 10/1, v/v) afforded the desired product **3c** as a yellow solid (70.4 mg, 83%). <sup>1</sup>H NMR (300 MHz, CDCl<sub>3</sub>):  $\delta$  = 7.68 (d, *J* = 8.1 Hz, 1H), 7.54-7.47 (m, 2H), 7.37-7.33 (m, 2H), 7.22 (d, *J* = 6.9 Hz, 2H), 7.15-7.07 (m, 4H), 2.30 (s, 3H), 1.38 (s, 9H) ppm; <sup>13</sup>C{<sup>1</sup>H} NMR (75 MHz, CDCl<sub>3</sub>):  $\delta$  = 151.5, 144.5, 141.4, 140.0, 138.8, 138.6, 138.3, 130.6, 130.3, 129.8, 128.64, 128.56, 128.3, 125.4, 125.2, 124.8, 124.3, 124.0, 120.7, 120.5, 34.9, 31.4, 15.9 ppm. HRMS (ESI<sup>+</sup>): calcd for C<sub>25</sub>H<sub>24</sub><sup>35</sup>ClS<sub>2</sub><sup>+</sup>: [M+H]<sup>+</sup>, 423.1003, found: 423.1001 ppm; HRMS (ESI<sup>+</sup>): calcd for C<sub>25</sub>H<sub>24</sub><sup>37</sup>ClS<sub>2</sub><sup>+</sup>: [M+H]<sup>+</sup>, 425.0973, found: 425.0976.

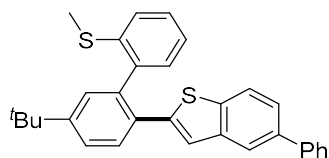

**2-(5-(*tert*-Butyl)-2'-(methylthio)-[1,1'-biphenyl]-2-yl)-5-phenylbenzo[*b*]thiophene (3d)**

Purification by column chromatography on silica gel (Petroleum ether/CH<sub>2</sub>Cl<sub>2</sub> = 10/1, v/v) afforded the desired product **3d** as a yellow solid (59.4 mg, 64%). <sup>1</sup>H NMR (300 MHz, CDCl<sub>3</sub>): δ = 7.77-7.67 (m, 3H), 7.59 (d, *J* = 7.5 Hz, 2H), 7.51-7.42 (m, 4H), 7.40-7.37 (m, 2H), 7.34-7.32 (m, 2H), 7.17-7.10 (m, 2H), 6.93 (s, 1H), 2.31 (s, 3H), 1.38 (s, 9H) ppm; <sup>13</sup>C{<sup>1</sup>H} NMR (75 MHz, CDCl<sub>3</sub>): δ = 151.1, 144.2, 141.5, 140.7, 140.2, 139.3, 138.7, 138.5, 137.5, 130.7, 130.6, 129.9, 128.9, 128.7, 128.4, 127.4, 127.1, 125.3, 125.2, 124.7, 124.30, 124.25, 123.7, 123.5, 122.7, 122.3, 121.9, 34.9, 31.4, 15.9 ppm. HRMS (ESI<sup>+</sup>): calcd for C<sub>31</sub>H<sub>29</sub>S<sub>2</sub><sup>+</sup>: [M+H]<sup>+</sup>, 465.1706, found: 465.1704.

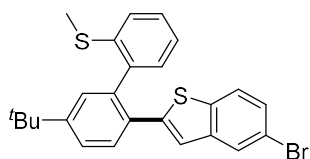

**5-Bromo-2-(5-(*tert*-butyl)-2'-(methylthio)-[1,1'-biphenyl]-2-yl)benzo[*b*]thiophene (3e)**

Purification by column chromatography on silica gel (Petroleum ether/CH<sub>2</sub>Cl<sub>2</sub> = 10/1, v/v) afforded the desired product **3e** as a yellow solid (72.7 mg, 78%). <sup>1</sup>H NMR (300 MHz, CDCl<sub>3</sub>): δ = 7.67 (d, *J* = 1.8 Hz, 1H), 7.63 (d, *J* = 8.1 Hz, 1H), 7.52-7.46 (m, 2H), 7.35-7.31 (m, 2H), 7.27 (dd, *J*<sub>1</sub> = 8.7 Hz, *J*<sub>2</sub> = 2.1 Hz, 1H), 7.22 (d, *J* = 7.8 Hz, 1H), 7.13-7.09 (m, 2H), 6.80 (s, 1H), 2.28 (s, 3H), 1.37 (s, 9H) ppm; <sup>13</sup>C{<sup>1</sup>H} NMR (75 MHz, CDCl<sub>3</sub>): δ = 151.5, 145.4, 141.7, 140.1, 138.8, 138.7, 138.6, 130.6, 130.3, 129.9, 128.7, 128.5, 126.8, 126.0, 125.4, 125.1, 124.7, 123.4, 121.6, 118.0, 34.9, 31.4, 15.9 ppm. HRMS (ESI<sup>+</sup>): calcd for C<sub>25</sub>H<sub>24</sub><sup>79</sup>BrS<sub>2</sub><sup>+</sup>: [M+H]<sup>+</sup>, 467.0498, found: 467.0500 ppm; HRMS (ESI<sup>+</sup>): calcd for C<sub>25</sub>H<sub>24</sub><sup>81</sup>BrS<sub>2</sub><sup>+</sup>: [M+H]<sup>+</sup>, 469.0477, found: 469.0471.

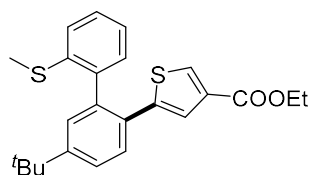

**Ethyl 5-(5-(*tert*-butyl)-2'-(methylthio)-[1,1'-biphenyl]-2-yl)thiophene-3-carboxylate (3f)**

Purification by column chromatography on silica gel (Petroleum ether/CH<sub>2</sub>Cl<sub>2</sub> = 2/1, v/v) afforded the desired product **3f** as a yellow solid (49.3 mg, 60%). <sup>1</sup>H NMR (300 MHz, CDCl<sub>3</sub>): δ = 7.83 (d, *J* = 1.5 Hz, 1H), 7.58 (d, *J* = 8.4 Hz, 1H), 7.45 (dd, *J*<sub>1</sub> = 2.1 Hz, *J*<sub>2</sub> = 8.1 Hz, 1H), 7.36 (d, *J* = 6.0 Hz, 1H), 7.31 (d, *J* = 2.1 Hz, 1H), 7.27 (d, *J* = 1.2 Hz, 1H), 7.23 (d, *J* = 7.8 Hz, 1H), 7.17-7.09 (m, 2H), 4.25 (q, *J* = 7.2 Hz, 2H), 2.31 (s, 3H), 1.36 (s, 9H), 1.32 (t, *J* = 7.2 Hz, 3H) ppm; <sup>13</sup>C {<sup>1</sup>H} NMR (75 MHz, CDCl<sub>3</sub>): δ = 163.0, 151.0, 143.7, 140.0, 139.0, 138.1, 133.1, 132.5, 130.7, 130.0, 129.1, 128.6, 128.4, 126.2, 125.4, 125.1, 124.7, 60.6, 34.8, 31.4, 15.9, 14.5 ppm. HRMS (ESI<sup>+</sup>): calcd for C<sub>24</sub>H<sub>27</sub>O<sub>2</sub>S<sub>2</sub><sup>+</sup>: [M+Na]<sup>+</sup>, 433.1267, found: 433.1266.

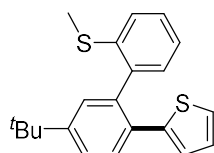

**2-(5-(*tert*-Butyl)-2'-(methylthio)-[1,1'-biphenyl]-2-yl)thiophene (3g)**

Purification by column chromatography on silica gel (Petroleum ether/CH<sub>2</sub>Cl<sub>2</sub> = 10/1, v/v) afforded the desired product **3g** as a yellow solid (22.3 mg, 33%). <sup>1</sup>H NMR (300 MHz, CDCl<sub>3</sub>): δ = 7.58 (d, *J* = 8.4 Hz, 1H), 7.44 (dd, *J*<sub>1</sub> = 8.1 Hz, *J*<sub>2</sub> = 2.1 Hz, 1H), 7.36-7.30 (m, 2H), 7.25 (d, *J* = 6.0 Hz, 1H), 7.16-7.09 (m, 3H), 6.83-6.81 (m, 1H), 6.72-6.71 (m, 1H), 2.29 (s, 3H), 1.36 (s, 9H) ppm; <sup>13</sup>C {<sup>1</sup>H} NMR (75 MHz, CDCl<sub>3</sub>): δ = 150.3, 143.1, 140.9, 138.8, 138.1, 130.9, 130.7, 129.4, 128.5, 128.2, 126.8, 125.9, 125.5, 125.2, 124.7, 34.8, 31.4, 16.0 ppm. HRMS (ESI<sup>+</sup>): calcd for C<sub>21</sub>H<sub>23</sub>S<sub>2</sub><sup>+</sup>: [M+H]<sup>+</sup>, 339.1236, found: 339.1239.

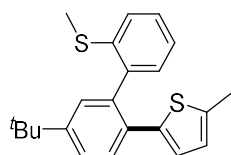

**2-(5-(*tert*-Butyl)-2'-(methylthio)-[1,1'-biphenyl]-2-yl)-5-methylthiophene (3h)**

Purification by column chromatography on silica gel (Petroleum ether/CH<sub>2</sub>Cl<sub>2</sub> = 10/1, v/v) afforded the desired product **3h** as a yellow solid (49.9 mg, 71%). <sup>1</sup>H NMR (300 MHz, CDCl<sub>3</sub>): δ = 7.53 (d, *J* = 8.1 Hz, 1H), 7.41 (dd, *J*<sub>1</sub> = 8.1 Hz, *J*<sub>2</sub> = 2.1 Hz, 1H), 7.35-7.31 (m, 1H), 7.28-7.23 (m, 2H), 7.12 (d, *J* = 3.6, 2H), 6.46 (s, 2H), 2.36 (s, 3H),



2.31 (s, 3H), 1.34 (s, 9H) ppm;  $^{13}\text{C}\{^1\text{H}\}$  NMR (75 MHz,  $\text{CDCl}_3$ ):  $\delta$  = 149.8, 140.9, 140.6, 139.6, 138.7, 137.6, 131.1, 130.6, 129.0, 128.5, 128.1, 125.8, 125.3, 125.1, 124.7, 34.7, 31.4, 16.0, 15.4 ppm. HRMS ( $\text{ESI}^+$ ): calcd for  $\text{C}_{22}\text{H}_{25}\text{S}_2^+$ :  $[\text{M}+\text{H}]^+$ , 353.1393, found: 353.1391.

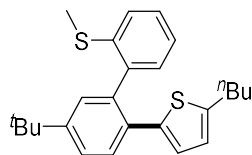

### 2-Butyl-5-(5-(*tert*-butyl)-2'-(methylthio)-[1,1'-biphenyl]-2-yl)thiophene (**3i**)

Purification by column chromatography on silica gel (Petroleum ether/ $\text{CH}_2\text{Cl}_2$  = 10/1, v/v) afforded the desired product **3i** as a yellow solid (47.3 mg, 60%).  $^1\text{H}$  NMR (300 MHz,  $\text{CDCl}_3$ ):  $\delta$  = 7.55 (d,  $J$  = 8.4 Hz, 1H), 7.41 (dd,  $J_1$  = 8.4 Hz,  $J_2$  = 2.1 Hz, 1H), 7.34-7.30 (m, 1H), 7.28 (d,  $J$  = 2.1 Hz, 1H), 7.25 (d,  $J$  = 6.9 Hz, 1H), 7.12 (d,  $J$  = 3.9 Hz, 2H), 6.46 (q,  $J$  = 3.6 Hz, 2H), 2.68 (t,  $J$  = 7.5 Hz, 2H), 2.29 (s, 3H), 1.54 (q,  $J$  = 7.8 Hz, 2H), 1.35 (s, 9H), 1.30 (t,  $J$  = 7.5 Hz, 2H), 0.89 (t,  $J$  = 7.5 Hz, 3H) ppm;  $^{13}\text{C}\{^1\text{H}\}$  NMR (75 MHz,  $\text{CDCl}_3$ ):  $\delta$  = 149.7, 145.6, 141.0, 140.3, 138.7, 137.6, 131.1, 130.6, 129.0, 128.4, 128.1, 125.5, 125.3, 125.1, 124.7, 124.0, 34.7, 33.7, 31.4, 29.8, 22.2, 16.0, 14.0 ppm. HRMS ( $\text{ESI}^+$ ): calcd for  $\text{C}_{25}\text{H}_{31}\text{S}_2^+$ :  $[\text{M}+\text{H}]^+$ , 395.1862, found: 395.1861.

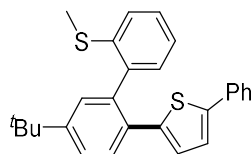

### 2-(5-(*tert*-Butyl)-2'-(methylthio)-[1,1'-biphenyl]-2-yl)-5-phenylthiophene (**3j**)

Purification by column chromatography on silica gel (Petroleum ether/ $\text{CH}_2\text{Cl}_2$  = 10/1, v/v) afforded the desired product **3j** as a yellow solid (52.2 mg, 63%).  $^1\text{H}$  NMR (300 MHz,  $\text{CDCl}_3$ ):  $\delta$  = 7.60 (d,  $J$  = 8.1 Hz, 1H), 7.47-7.41 (m, 3H), 7.36-7.29 (m, 3H), 7.26-7.18 (m, 3H), 7.16-7.13 (m, 2H), 7.01 (d,  $J$  = 3.6 Hz, 1H), 6.60 (d,  $J$  = 3.9 Hz, 1H), 2.28 (s, 3H), 1.35 (s, 9H) ppm;  $^{13}\text{C}\{^1\text{H}\}$  NMR (75 MHz,  $\text{CDCl}_3$ ):  $\delta$  = 150.4, 143.5, 142.5, 140.6, 138.7, 137.8, 134.6, 130.7, 130.6, 129.0, 128.9, 128.6, 128.3, 127.3, 126.9, 125.6, 125.3, 124.7, 123.1, 34.8, 31.4, 15.9 ppm. HRMS ( $\text{ESI}^+$ ): calcd for  $\text{C}_{27}\text{H}_{27}\text{S}_2^+$ :  $[\text{M}+\text{H}]^+$ , 415.1549, found: 415.1550.

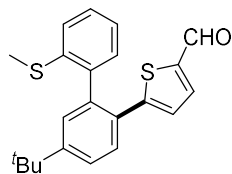

**5-(5-(*tert*-Butyl)-2'-(methylthio)-[1,1'-biphenyl]-2-yl)thiophene-2-carbaldehyde (3k)**

Purification by column chromatography on silica gel (Petroleum ether/CH<sub>2</sub>Cl<sub>2</sub> = 2/1, v/v) afforded the desired product **3k** as a yellow solid (38.1 mg, 52%). <sup>1</sup>H NMR (300 MHz, CDCl<sub>3</sub>):  $\delta$  = 9.75 (s, 1H), 7.60 (d, *J* = 8.4 Hz, 1H), 7.50-7.47 (m, 2H), 7.38-7.33 (m, 2H), 7.23 (d, *J* = 7.2, 1H), 7.17-7.09 (m, 2H), 6.78 (d, *J* = 3.9 Hz, 1H) 2.31 (s, 3H), 1.37 (s, 9H) ppm; <sup>13</sup>C{<sup>1</sup>H} NMR (75 MHz, CDCl<sub>3</sub>):  $\delta$  = 183.0, 153.7, 152.3, 142.6, 139.6, 138.6, 138.5, 136.5, 130.5, 129.7, 129.5, 128.8, 128.7, 127.1, 125.5, 125.1, 124.8, 35.0, 31.3, 15.7 ppm. HRMS (ESI<sup>+</sup>): calcd for C<sub>22</sub>H<sub>23</sub>OS<sub>2</sub><sup>+</sup>: [M+H]<sup>+</sup>, 367.1185, found: 367.1182.

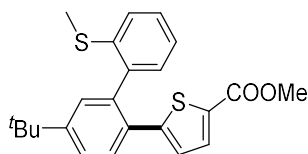

**Methyl 5-(5-(*tert*-butyl)-2'-(methylthio)-[1,1'-biphenyl]-2-yl)thiophene-2-carboxylate (3l)**

Purification by column chromatography on silica gel (Petroleum ether/CH<sub>2</sub>Cl<sub>2</sub> = 1/1, v/v) afforded the desired product **3l** as a yellow solid (58.7 mg, 74%). <sup>1</sup>H NMR (300 MHz, CDCl<sub>3</sub>):  $\delta$  = 7.49 (d, *J* = 8.1 Hz, 1H), 7.42-7.36 (m, 2H), 7.29-7.23 (m, 2H), 7.16-7.13 (m, 1H), 7.08-7.01 (m, 2H), 6.54 (d, *J* = 3.9 Hz, 1H), 3.73 (s, 3H), 2.22 (s, 3H), 1.28 (s, 9H) ppm; <sup>13</sup>C{<sup>1</sup>H} NMR (75 MHz, CDCl<sub>3</sub>):  $\delta$  = 162.9, 151.6, 150.5, 139.8, 138.5, 138.3, 133.4, 132.1, 130.4, 129.9, 129.5, 128.7, 128.5, 126.7, 125.4, 125.1, 124.7, 52.1, 34.9, 31.3, 15.8 ppm. HRMS (ESI<sup>+</sup>): calcd for C<sub>23</sub>H<sub>25</sub>O<sub>2</sub>S<sub>2</sub><sup>+</sup>: [M+H]<sup>+</sup>, 397.1291, found: 397.1280.

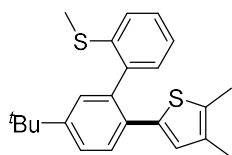

**5-(5-(*tert*-Butyl)-2'-(methylthio)-[1,1'-biphenyl]-2-yl)-2,3-dimethylthiophene (3m)**

Purification by column chromatography on silica gel (Petroleum ether/CH<sub>2</sub>Cl<sub>2</sub> = 10/1, v/v) afforded the desired product **3m** as a yellow solid (53.5 mg, 73%). <sup>1</sup>H NMR (300 MHz, CDCl<sub>3</sub>): δ = 7.45 (d, *J* = 8.1 Hz, 1H), 7.33-7.30 (m, 1H), 7.24-7.22 (m, 1H), 7.18-7.15 (m, 2H), 7.05 (d, *J* = 4.5 Hz, 2H), 6.32 (s, 1H), 2.22 (s, 3H), 2.11 (s, 3H), 1.88 (s, 3H), 1.27 (s, 9H) ppm; <sup>13</sup>C {<sup>1</sup>H} NMR (75 MHz, CDCl<sub>3</sub>): δ = 149.5, 140.9, 138.7, 137.8, 137.4, 132.9, 132.8, 131.0, 130.6, 128.8, 128.7, 128.4, 128.1, 125.3, 125.1, 124.7, 34.7, 31.4, 16.0, 14.3, 12.5 ppm. HRMS (ESI<sup>+</sup>): calcd for C<sub>23</sub>H<sub>27</sub>S<sub>2</sub><sup>+</sup>: [M+H]<sup>+</sup>, 367.1549, found: 367.1549.

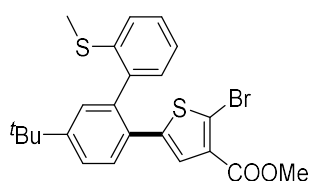

**Methyl 2-bromo-5-(5-(*tert*-butyl)-2'-(methylthio)-[1,1'-biphenyl]-2-yl)thiophene-3-carboxylate (3n)**

Purification by column chromatography on silica gel (Petroleum ether/CH<sub>2</sub>Cl<sub>2</sub> = 1/1, v/v) afforded the desired product **3n** as a yellow solid (59.7mg, 62%). <sup>1</sup>H NMR (300 MHz, CDCl<sub>3</sub>): δ = 7.56-7.52 (m, 1H), 7.47-7.43 (m, 1H), 7.39-7.36 (m, 1H), 7.29 (d, *J* = 1.8 Hz, 1H), 7.25-7.23 (m, 1H), 7.19-7.09 (m, 3H), 3.82 (s, 3H), 2.31 (s, 3H), 1.35 (s, 9H) ppm; <sup>13</sup>C {<sup>1</sup>H} NMR (75 MHz, CDCl<sub>3</sub>): δ = 162.6, 151.5, 143.2, 139.3, 139.0, 138.0, 130.7, 130.3, 129.3, 128.9, 128.6, 128.5, 127.0, 125.5, 125.1, 124.8, 119.5, 51.9, 34.9, 31.4, 15.7 ppm. HRMS (ESI<sup>+</sup>): calcd for C<sub>23</sub>H<sub>24</sub><sup>79</sup>BrO<sub>2</sub>S<sub>2</sub><sup>+</sup>: [M+H]<sup>+</sup>, 475.0396, found: 475.0417; HRMS (ESI<sup>+</sup>): calcd for C<sub>23</sub>H<sub>24</sub><sup>81</sup>BrO<sub>2</sub>S<sub>2</sub><sup>+</sup>: [M+H]<sup>+</sup>, 477.0376, found: 477.0285.

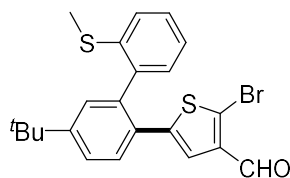

**2-Bromo-5-(5-(*tert*-butyl)-2'-(methylthio)-[1,1'-biphenyl]-2-yl)thiophene-3-carbaldehyde (3o)**

Purification by column chromatography on silica gel (Petroleum ether/CH<sub>2</sub>Cl<sub>2</sub> = 5/1, v/v) afforded the desired product **3o** as a yellow solid (46.0 mg, 52%). <sup>1</sup>H NMR (300 MHz, CDCl<sub>3</sub>): δ = 9.79 (s, 1H), 7.55-7.48 (m, 1H), 7.47-7.42 (m, 1H), 7.40-7.36 (m,

1H), 7.30 (d,  $J = 1.5$  Hz, 1H), 7.25-7.23 (m, 1H), 7.19-7.09 (m, 3H), 2.33 (s, 3H), 1.36 (s, 9H) ppm;  $^{13}\text{C}\{^1\text{H}\}$  NMR (75 MHz,  $\text{CDCl}_3$ ):  $\delta = 184.9, 151.9, 144.5, 139.0, 138.03, 137.99, 130.6, 129.03, 129.00, 128.7, 128.5, 127.0, 126.4, 125.6, 125.0, 124.8, 123.5, 34.9, 31.3, 15.7$  ppm. HRMS ( $\text{ESI}^+$ ): calcd for  $\text{C}_{22}\text{H}_{22}^{79}\text{BrOS}_2^+$ :  $[\text{M}+\text{Na}]^+$ , 467.0110, found: 467.0105; HRMS ( $\text{ESI}^+$ ): calcd for  $\text{C}_{22}\text{H}_{22}^{81}\text{BrOS}_2^+$ :  $[\text{M}+\text{Na}]^+$ , 469.0089, found: 469.0090.

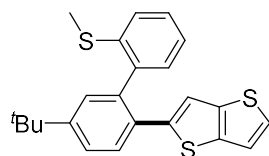

### 2-(5-(*tert*-Butyl)-2'-(methylthio)-[1,1'-biphenyl]-2-yl)thieno[3,2-*b*]thiophene (**3p**)

Purification by column chromatography on silica gel (Petroleum ether/ $\text{CH}_2\text{Cl}_2 = 15/1$ , v/v) afforded the desired product **3p** as a yellow solid (34.6 mg, 44%).  $^1\text{H}$  NMR (300 MHz,  $\text{CDCl}_3$ ):  $\delta = 7.52$  (d,  $J = 8.4$  Hz, 1H), 7.38 (dd,  $J_1 = 8.1$  Hz,  $J_2 = 2.1$  Hz, 1H), 7.25-7.22 (m, 2H), 7.17-7.13 (m, 2H), 7.06-7.01 (m, 3H), 6.77 (s, 1H), 2.23 (s, 3H), 1.28 (s, 9H) ppm;  $^{13}\text{C}\{^1\text{H}\}$  NMR (75 MHz,  $\text{CDCl}_3$ ):  $\delta = 150.7, 145.2, 140.3, 139.3, 139.2, 138.7, 138.0, 131.1, 130.6, 129.5, 128.7, 128.4, 126.2, 125.3, 125.1, 124.7, 119.6, 118.1, 34.8, 31.4, 15.9$  ppm. HRMS ( $\text{ESI}^+$ ): calcd for  $\text{C}_{23}\text{H}_{23}\text{S}_3^+$ :  $[\text{M}+\text{H}]^+$ , 395.0957, found: 395.0959.

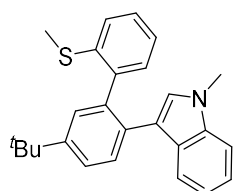

### 3-(5-(*tert*-Butyl)-2'-(methylthio)-[1,1'-biphenyl]-2-yl)-1-methyl-1*H*-indole (**3q**)

Purification by column chromatography on silica gel (Petroleum ether/ $\text{CH}_2\text{Cl}_2 = 10/1$ , v/v) afforded the desired product **3q** as a yellow solid (27.7 mg, 36%).  $^1\text{H}$  NMR (300 MHz,  $\text{CDCl}_3$ ):  $\delta = 7.71$  (d,  $J = 7.8$  Hz, 1H), 7.60 (d,  $J = 8.1$  Hz, 1H), 7.41 (dd,  $J_1 = 2.1$  Hz,  $J_2 = 8.1$  Hz, 1H), 7.33 (d,  $J = 2.4$  Hz, 1H), 7.18-7.11 (m, 4H), 7.04-6.00 (m, 1H), 6.97-6.87 (m, 2H), 6.32 (s, 1H), 3.50 (s, 3H), 2.21 (s, 3H), 1.32 (s, 9H) ppm;  $^{13}\text{C}\{^1\text{H}\}$  NMR (75 MHz,  $\text{CDCl}_3$ ):  $\delta = 147.4, 140.6, 137.5, 137.3, 135.7, 130.2, 129.7, 129.0, 127.5, 127.4, 126.6, 126.5, 123.9, 123.8, 123.3, 120.4, 119.2, 118.4, 113.7, 108.1, 33.7,$

31.8, 30.5, 15.0 ppm. HRMS (ESI<sup>+</sup>): calcd for C<sub>26</sub>H<sub>28</sub>NS<sup>+</sup>: [M+H]<sup>+</sup>, 386.1937, found: 386.1934.

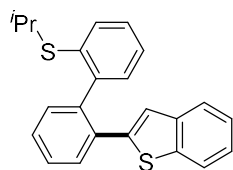

**2-(2'-(Isopropylthio)-[1,1'-biphenyl]-2-yl)benzo[b]thiophene (4a)**

Purification by column chromatography on silica gel (Petroleum ether/CH<sub>2</sub>Cl<sub>2</sub> = 10/1, v/v) afforded the desired product **4a** as a yellow solid (26.7 mg, 37%). <sup>1</sup>H NMR (300 MHz, CDCl<sub>3</sub>): δ = 7.72-7.67 (m, 2H), 7.57-7.54 (m, 1H), 7.45-7.38 (m, 2H), 7.37-7.29 (m, 3H), 7.25-7.19 (m, 2H), 7.17-7.10 (m, 2H), 6.91 (s, 1H), 3.31 (q, *J* = 6.6 Hz, 1H), 1.19 (d, *J* = 6.6 Hz, 3H), 1.08 (d, *J* = 6.6 Hz, 3H) ppm; <sup>13</sup>C{<sup>1</sup>H} NMR (75 MHz, CDCl<sub>3</sub>): δ = 143.5, 141.8, 140.4, 140.1, 139.6, 136.5, 133.8, 131.4, 131.0, 130.2, 129.1, 128.2, 128.2, 127.8, 125.6, 124.1, 123.9, 123.5, 123.1, 122.0, 36.8, 23.0, 22.7 ppm. HRMS (ESI<sup>+</sup>): calcd for C<sub>23</sub>H<sub>21</sub>S<sub>2</sub><sup>+</sup>: [M+H]<sup>+</sup>, 361.1080, found: 361.1083.

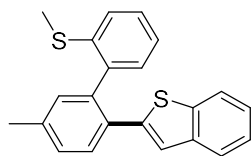

**2-(5-Methyl-2'-(methylthio)-[1,1'-biphenyl]-2-yl)benzo[b]thiophene (4b)**

Purification by column chromatography on silica gel (Petroleum ether/CH<sub>2</sub>Cl<sub>2</sub> = 15/1, v/v) afforded the desired product **4b** as a yellow solid (43.6 mg, 63%). <sup>1</sup>H NMR (300 MHz, CDCl<sub>3</sub>): δ = 7.71-7.62 (m, 2H), 7.60-7.57 (m, 1H), 7.37-7.35 (m, 1H), 7.32-7.28 (m, 2H), 7.25-7.21 (m, 3H), 7.16 (s, 2H), 6.94-6.93 (m, 1H), 2.44 (s, 3H), 2.31 (s, 3H) ppm; <sup>13</sup>C{<sup>1</sup>H} NMR (75 MHz, CDCl<sub>3</sub>): δ = 143.4, 140.3, 140.1, 140.0, 138.8, 138.5, 138.0, 131.9, 131.0, 130.5, 130.1, 129.2, 128.4, 125.0, 124.7, 124.0, 123.8, 123.5, 122.5, 122.0, 21.3, 15.9 ppm. HRMS (ESI<sup>+</sup>): calcd for C<sub>22</sub>H<sub>19</sub>S<sub>2</sub><sup>+</sup>: [M+H]<sup>+</sup>, 347.0923, found: 347.0924.

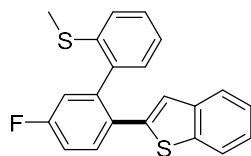

**2-(5-Fluoro-2'-(methylthio)-[1,1'-biphenyl]-2-yl)benzo[b]thiophene (4c)**

Purification by column chromatography on silica gel (Petroleum ether/CH<sub>2</sub>Cl<sub>2</sub> = 10/1, v/v) afforded the desired product **4c** as a yellow solid (40.6 mg, 58%). <sup>1</sup>H NMR (300 MHz, CDCl<sub>3</sub>): δ = 7.70-7.66 (m, 2H), 7.58 (d, *J* = 8.41 Hz, 1H), 7.39-7.32 (m, 1H), 7.24-7.13 (m, 6H), 7.10-7.06 (m, 1H), 6.92 (s, 1H), 2.31 (s, 3H) ppm; <sup>13</sup>C{<sup>1</sup>H} NMR (75 MHz, CDCl<sub>3</sub>): δ = 162.2 (d, *J*<sub>CF</sub> = 248.25 Hz), 142.2, 140.4, 140.0, 138.8, 138.4, 132.1 (d, *J*<sub>CF</sub> = 8.25 Hz), 130.4, 130.2 (d, *J*<sub>CF</sub> = 3 Hz), 128.9, 128.6, 125.4, 124.9, 124.1 (d, *J*<sub>CF</sub> = 7.5 Hz), 123.6, 123.0, 122.03, 121.95, 118.2 (d, *J*<sub>CF</sub> = 21 Hz), 115.4 (d, *J*<sub>CF</sub> = 8.25 Hz), 15.9 ppm. HRMS (ESI<sup>+</sup>): calcd for C<sub>21</sub>H<sub>16</sub>FS<sub>2</sub><sup>+</sup>: [M+H]<sup>+</sup>, 351.0672, found: 351.0677.

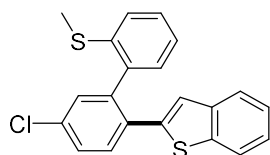

**2-(5-Chloro-2'-(methylthio)-[1,1'-biphenyl]-2-yl)benzo[b]thiophene (4d)**

Purification by column chromatography on silica gel (Petroleum ether/CH<sub>2</sub>Cl<sub>2</sub> = 10/1, v/v) afforded the desired product **4d** as a yellow solid (54.2 mg, 74%). <sup>1</sup>H NMR (300 MHz, CDCl<sub>3</sub>): δ = 7.68-7.62 (m, 2H), 7.58-7.55 (m, 1H), 7.41 (dd, *J*<sub>1</sub> = 8.4 Hz, *J*<sub>2</sub> = 2.1 Hz, 1H), 7.36-7.31 (m, 2H), 7.24-7.18 (m, 3H), 7.12 (d, *J* = 4.2 Hz, 2H), 6.94 (s, 1H), 2.28 (s, 3H) ppm; <sup>13</sup>C{<sup>1</sup>H} NMR (75 MHz, CDCl<sub>3</sub>): δ = 142.0, 140.4, 140.3, 139.9, 138.4, 133.8, 132.5, 131.4, 131.2, 130.4, 128.9, 128.4, 125.3, 124.9, 124.2, 123.7, 123.2, 122.0, 15.8 ppm. HRMS (ESI<sup>+</sup>): calcd for C<sub>21</sub>H<sub>16</sub><sup>35</sup>ClS<sub>2</sub><sup>+</sup>: [M+H]<sup>+</sup>, 367.0377, found: 367.0377 ppm; HRMS (ESI<sup>+</sup>): calcd for C<sub>21</sub>H<sub>16</sub><sup>37</sup>ClS<sub>2</sub><sup>+</sup>: [M+H]<sup>+</sup>, 369.0347, found: 369.0293.

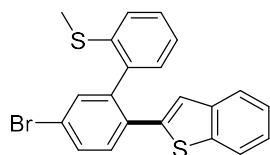

**2-(5-Bromo-2'-(methylthio)-[1,1'-biphenyl]-2-yl)benzo[b]thiophene (4e)**

Purification by column chromatography on silica gel (Petroleum ether/CH<sub>2</sub>Cl<sub>2</sub> = 10/1, v/v) afforded the desired product **4e** as a yellow solid (50.9 mg, 62%). <sup>1</sup>H NMR (300 MHz, CDCl<sub>3</sub>): δ = 7.68-7.65 (m, 1H), 7.58-7.56 (m, 3H), 7.48 (s, 1H), 7.35-7.31 (m, 1H), 7.24-7.18 (m, 3H), 7.13 (d, *J* = 4.5 Hz, 2H), 6.94 (s, 1H), 2.28 (s, 3H) ppm; <sup>13</sup>C{<sup>1</sup>H} NMR (75 MHz, CDCl<sub>3</sub>): δ = 142.0, 140.4, 140.3, 139.9, 138.4, 133.8, 132.5, 131.4, 131.2, 130.4, 128.9, 128.4, 125.3, 124.9, 124.2, 123.7, 123.2, 122.0, 15.8 ppm.

NMR (75 MHz, CDCl<sub>3</sub>):  $\delta$  = 148.4, 142.0, 140.7, 140.4, 139.9, 138.5, 134.1, 132.9, 131.6, 131.4, 130.4, 128.9, 125.3, 124.9, 124.24, 124.22, 123.7, 123.2, 122.0, 121.9, 15.9 ppm. HRMS (ESI<sup>+</sup>): calcd for C<sub>21</sub>H<sub>16</sub><sup>79</sup>BrS<sub>2</sub><sup>+</sup>: [M+H]<sup>+</sup>, 410.9872, found: 410.9851 ppm; HRMS (ESI<sup>+</sup>): calcd for C<sub>21</sub>H<sub>16</sub><sup>81</sup>BrS<sub>2</sub><sup>+</sup>: [M+H]<sup>+</sup>, 412.9851, found: 412.9850.

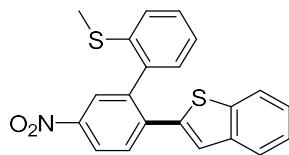

**2-(2'-(Methylthio)-5-nitro-[1,1'-biphenyl]-2-yl)benzo[b]thiophene (4f)**

Purification by column chromatography on silica gel (Petroleum ether/CH<sub>2</sub>Cl<sub>2</sub> = 2/1, v/v) afforded the desired product **4f** as a yellow solid (27.1 mg, 36%). <sup>1</sup>H NMR (300 MHz, CDCl<sub>3</sub>):  $\delta$  = 8.29-8.20 (m, 2H), 7.87 (d, *J* = 8.7 Hz, 1H), 7.68-7.61 (m, 3H), 7.40-7.38 (m, 2H), 7.24-7.17 (m, 3H), 7.09 (s, 1H), 2.29 (s, 3H) ppm; <sup>13</sup>C{<sup>1</sup>H} NMR (75 MHz, CDCl<sub>3</sub>):  $\delta$  = 146.9, 140.9, 140.6, 140.5, 140.0, 139.6, 138.5, 137.7, 130.8, 130.4, 129.5, 126.8, 125.8, 125.2, 125.1, 124.6, 124.2, 123.2, 122.1, 16.0 ppm. HRMS (ESI<sup>+</sup>): calcd for C<sub>21</sub>H<sub>16</sub>NO<sub>2</sub>S<sub>2</sub><sup>+</sup>: [M+Na]<sup>+</sup>, 400.0437, found: 400.0436.

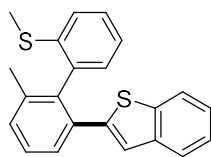

**2-(6-Methyl-2'-(methylthio)-[1,1'-biphenyl]-2-yl)benzo[b]thiophene (4g)**

Purification by column chromatography on silica gel (Petroleum ether/CH<sub>2</sub>Cl<sub>2</sub> = 15/1, v/v) afforded the desired product **4g** as a yellow solid (36.0 mg, 52%). <sup>1</sup>H NMR (300 MHz, CDCl<sub>3</sub>):  $\delta$  = 7.68 (d, *J* = 8.4 Hz, 1H), 7.58 (d, *J* = 6.9 Hz, 2H), 7.41-7.31 (m, 3H), 7.25-7.18 (m, 3H), 7.16-7.05 (m, 2H), 6.95 (s, 1H), 2.35 (s, 3H), 2.11 (s, 3H) ppm; <sup>13</sup>C{<sup>1</sup>H} NMR (75 MHz, CDCl<sub>3</sub>):  $\delta$  = 143.7, 140.5, 140.0, 138.9, 138.5, 138.3, 137.9, 134.1, 130.3, 130.1, 128.4, 128.2, 128.1, 124.9, 124.5, 124.0, 123.8, 123.5, 123.0, 121.9, 20.6, 15.3 ppm. HRMS (ESI<sup>+</sup>): calcd for C<sub>22</sub>H<sub>19</sub>S<sub>2</sub><sup>+</sup>: [M+H]<sup>+</sup>, 347.0923, found: 347.0922.

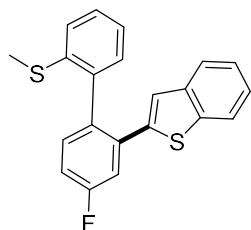

**2-(4-Fluoro-2'-(methylthio)-[1,1'-biphenyl]-2-yl)benzo[*b*]thiophene (4h)**

Purification by column chromatography on silica gel (Petroleum ether/CH<sub>2</sub>Cl<sub>2</sub> = 10/1, v/v) afforded the desired product **4h** as a yellow solid (37.1 mg, 53%). <sup>1</sup>H NMR (300 MHz, CDCl<sub>3</sub>): δ = 7.70-7.67 (m, 1H), 7.60-7.57 (m, 1H), 7.43 (dd, *J*<sub>1</sub> = 9.9 Hz, *J*<sub>2</sub> = 2.7 Hz, 1H), 7.35-7.31 (m, 1H), 7.29-7.20 (m, 4H), 7.13-7.08 (m, 3H), 6.98 (s, 1H), 2.30 (s, 3H) ppm; <sup>13</sup>C{<sup>1</sup>H} NMR (75 MHz, CDCl<sub>3</sub>): δ = 162.4 (d, *J*<sub>CF</sub> = 245.25 Hz), 141.9 (d, *J*<sub>CF</sub> = 2.25 Hz), 140.5, 139.8, 138.8, 135.8 (d, *J*<sub>CF</sub> = 8.25 Hz), 134.9 (d, *J*<sub>CF</sub> = 3.75 Hz), 133.0 (d, *J*<sub>CF</sub> = 8.25 Hz), 130.8, 128.7, 125.1, 124.9, 124.4, 124.3, 123.8, 123.5, 122.1, 116.8 (d, *J*<sub>CF</sub> = 22.5 Hz), 115.0 (d, *J*<sub>CF</sub> = 21 Hz), 15.8 ppm. HRMS (ESI<sup>+</sup>): calcd for C<sub>21</sub>H<sub>16</sub>FS<sub>2</sub><sup>+</sup>: [M+H]<sup>+</sup>, 351.0672, found: 351.0678.

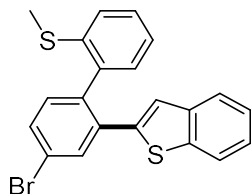

**2-(4-Bromo-2'-(methylthio)-[1,1'-biphenyl]-2-yl)benzo[*b*]thiophene (4i)**

Purification by column chromatography on silica gel (Petroleum ether/CH<sub>2</sub>Cl<sub>2</sub> = 2/1, v/v) afforded the desired product **4i** as a yellow solid (50.1 mg, 61%). <sup>1</sup>H NMR (300 MHz, CDCl<sub>3</sub>): δ = 7.86 (d, *J* = 2.1 Hz, 1H), 7.67-7.64 (m, 1H), 7.59-7.56 (m, 1H), 7.51 (dd, *J*<sub>1</sub> = 8.4 Hz, *J*<sub>2</sub> = 2.1 Hz, 1H), 7.32-7.29 (m, 1H), 7.24-7.19 (m, 3H), 7.17 (d, *J* = 3.0 Hz, 1H), 7.09 (d, *J* = 3.3 Hz, 2H), 6.99 (s, 1H), 2.27 (s, 3H); <sup>13</sup>C{<sup>1</sup>H} NMR (75 MHz, CDCl<sub>3</sub>): δ = 141.5, 140.5, 139.7, 138.5, 137.8, 135.9, 132.8, 130.9, 130.4, 128.8, 125.2, 124.8, 124.3, 124.2, 123.8, 123.6, 122.2, 122.0, 15.8 ppm. HRMS (ESI<sup>+</sup>): calcd for C<sub>21</sub>H<sub>16</sub><sup>79</sup>BrS<sub>2</sub><sup>+</sup>: [M+H]<sup>+</sup>, 410.9872, found: 410.9889 ppm; HRMS (ESI<sup>+</sup>): calcd for C<sub>21</sub>H<sub>16</sub><sup>81</sup>BrS<sub>2</sub><sup>+</sup>: [M+H]<sup>+</sup>, 412.9851, found: 412.9851.



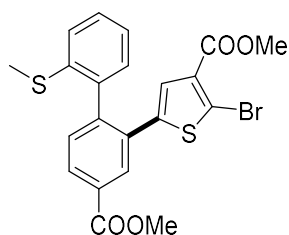

**Methyl 2-bromo-5-(4-(methoxycarbonyl)-2'-(methylthio)-[1,1'-biphenyl]-2-yl)thiophene-3-carboxylate (4j)**

Purification by column chromatography on silica gel (Petroleum ether/CH<sub>2</sub>Cl<sub>2</sub> = 1/1, v/v) afforded the desired product **4j** as a yellow solid (58.1 mg, 61%). <sup>1</sup>H NMR (300 MHz, CDCl<sub>3</sub>): δ = 8.28 (d, *J* = 1.8 Hz, 1H), 8.05 (dd, *J*<sub>1</sub> = 7.8 Hz, *J*<sub>2</sub> = 1.8 Hz, 1H), 7.42-7.32 (m, 3H), 7.26-7.16 (m, 2H), 7.08 (dd, *J*<sub>1</sub> = 7.5 Hz, *J*<sub>2</sub> = 1.5 Hz, 1H), 3.97 (s, 3H), 3.84 (s, 3H), 2.33 (s, 3H) ppm; <sup>13</sup>C{<sup>1</sup>H} NMR (75 MHz, CDCl<sub>3</sub>): δ = 166.5, 162.5, 142.9, 141.8, 138.5, 138.0, 132.7, 131.6, 130.4, 130.2, 130.1, 129.5, 129.2, 128.9, 128.1, 125.4, 125.1, 120.6, 52.5, 52.0, 15.7 ppm. HRMS (ESI<sup>+</sup>): calcd for C<sub>21</sub>H<sub>18</sub><sup>79</sup>BrO<sub>4</sub>S<sub>2</sub><sup>+</sup>: [M+Na]<sup>+</sup>, 498.9644, found: 498.9641; HRMS (ESI<sup>+</sup>): calcd for C<sub>21</sub>H<sub>18</sub><sup>81</sup>BrO<sub>4</sub>S<sub>2</sub><sup>+</sup>: [M+Na]<sup>+</sup>, 500.9624, found: 500.9622.

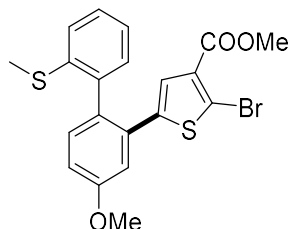

**Methyl 2-bromo-5-(4-methoxy-2'-(methylthio)-[1,1'-biphenyl]-2-yl)thiophene-3-carboxylate (4k)**

Purification by column chromatography on silica gel (Petroleum ether/CH<sub>2</sub>Cl<sub>2</sub> = 1/1, v/v) afforded the desired product **4k** as a yellow solid (33.9 mg, 38%). <sup>1</sup>H NMR (300 MHz, CDCl<sub>3</sub>): δ = 7.37 (m, 1H), 7.22-7.18 (m, 3H), 7.14-7.06 (m, 3H), 6.96 (dd, *J*<sub>1</sub> = 7.2 Hz, *J*<sub>2</sub> = 2.7 Hz, 1H), 3.89 (s, 3H), 3.82 (s, 3H), 2.32 (s, 3H) ppm; <sup>13</sup>C{<sup>1</sup>H} NMR (75 MHz, CDCl<sub>3</sub>): δ = 162.6, 159.5, 142.9, 139.4, 138.4, 135.5, 133.3, 132.4, 131.0, 130.3, 128.9, 127.5, 126.0, 124.8, 120.1, 114.1, 55.6, 52.0, 15.6 ppm. HRMS (ESI<sup>+</sup>): calcd for C<sub>20</sub>H<sub>18</sub><sup>79</sup>BrO<sub>3</sub>S<sub>2</sub><sup>+</sup>: [M+Na]<sup>+</sup>, 470.9695, found: 470.9695; HRMS (ESI<sup>+</sup>): calcd for C<sub>20</sub>H<sub>18</sub><sup>81</sup>BrO<sub>3</sub>S<sub>2</sub><sup>+</sup>: [M+Na]<sup>+</sup>, 472.9675, found: 472.9672.

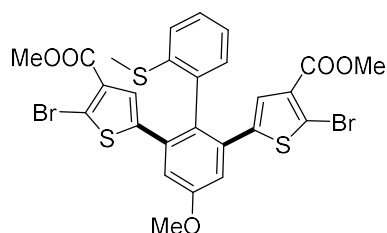

**Dimethyl 5,5'-(4-methoxy-2'-(methylthio)-[1,1'-biphenyl]-2,6-diyl)bis(2-bromothiophene-3-carboxylate) (4k')**

Purification by column chromatography on silica gel (Petroleum ether/CH<sub>2</sub>Cl<sub>2</sub> = 1/2, v/v) afforded the desired product **4k'** as a yellow solid (20.0 mg, 15%). <sup>1</sup>H NMR (300 MHz, CDCl<sub>3</sub>): δ = 7.41-7.35 (m, 1H), 7.22 (s, 1H), 7.15-7.08 (m, 4H), 6.99 (dd, *J*<sub>1</sub> = 7.5 Hz, *J*<sub>2</sub> = 1.5 Hz, 2H), 3.92 (s, 3H), 3.82 (s, 6H), 2.31 (s, 3H) ppm; <sup>13</sup>C{<sup>1</sup>H} NMR (75 MHz, CDCl<sub>3</sub>): δ = 162.5, 159.3, 142.4, 141.1, 135.3, 135.0, 132.2, 130.1, 129.9, 129.3, 129.1, 128.3, 127.9, 125.0, 124.8, 120.6, 115.2, 55.8, 52.0, 15.3 ppm. HRMS (ESI<sup>+</sup>): calcd for C<sub>26</sub>H<sub>21</sub><sup>79</sup>Br<sub>2</sub>O<sub>5</sub>S<sub>3</sub><sup>+</sup>: [M+Na]<sup>+</sup>, 688.8737, found: 688.8737; HRMS (ESI<sup>+</sup>): calcd for C<sub>26</sub>H<sub>21</sub><sup>81</sup>Br<sub>2</sub>O<sub>5</sub>S<sub>3</sub><sup>+</sup>: [M+Na]<sup>+</sup>, 690.8712, found: 690.8690.

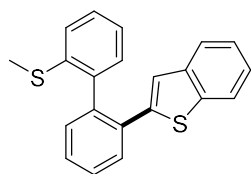

**2-(2'-(Methylthio)-[1,1'-biphenyl]-2-yl)benzo[b]thiophene (4l)**

Purification by column chromatography on silica gel (Petroleum ether/CH<sub>2</sub>Cl<sub>2</sub> = 15/1, v/v) afforded the desired product **4k** as a yellow solid (36.5 mg, 55%). <sup>1</sup>H NMR (300 MHz, CDCl<sub>3</sub>): δ = 7.75-7.68 (m, 2H), 7.61-7.57 (m, 1H), 7.50-7.40 (m, 2H), 7.35-7.31 (m, 2H), 7.26-7.21 (m, 3H), 7.14-7.13 (m, 2H), 6.96 (s, 1H), 2.31 (s, 3H) ppm; <sup>13</sup>C{<sup>1</sup>H} NMR (75 MHz, CDCl<sub>3</sub>): δ = 143.3, 140.4, 140.0, 139.8, 138.9, 138.5, 133.8, 131.3, 130.5, 130.3, 128.5, 128.4, 128.0, 125.1, 124.8, 124.1, 124.0, 123.6, 123.0, 122.0, 15.9 ppm. HRMS (ESI<sup>+</sup>): calcd for C<sub>21</sub>H<sub>17</sub>S<sub>2</sub><sup>+</sup>: [M+H]<sup>+</sup>, 333.0767, found: 333.0769.

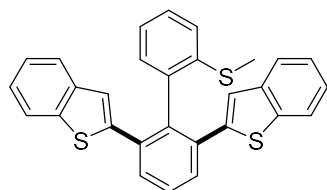

**2,2'-(2'-(Methylthio)-[1,1'-biphenyl]-2,6-diyl)bis(benzo[b]thiophene) (4l')**

Purification by column chromatography on silica gel (Petroleum ether/CH<sub>2</sub>Cl<sub>2</sub> = 10/1, v/v) afforded the desired product **4k'** as a yellow solid (9.2 mg, 10%). <sup>1</sup>H NMR (300 MHz, CDCl<sub>3</sub>): δ = 7.72 (s, 1H), 7.69 (s, 2H), 7.66 (d, *J* = 2.1 Hz, 1H), 7.59 (d, *J* = 2.1 Hz, 1H), 7.58-7.56 (m, 1H), 7.54-7.51 (m, 1H), 7.24-7.20 (m, 5H), 7.11 (t, *J* = 7.5 Hz, 2H), 7.03 (dd, *J*<sub>1</sub> = 7.2 Hz, *J*<sub>2</sub> = 1.2 Hz, 1H), 6.95 (s, 2H), 2.21 (s, 3H) ppm; <sup>13</sup>C{<sup>1</sup>H} NMR (75 MHz, CDCl<sub>3</sub>): δ = 143.1, 140.6, 139.9, 137.7, 137.5, 135.4, 131.6, 130.8, 128.9, 128.4, 125.4, 124.8, 124.1, 124.0, 123.7, 123.6, 122.0, 15.9 ppm. HRMS (ESI<sup>+</sup>): calcd for C<sub>29</sub>H<sub>21</sub>S<sub>3</sub><sup>+</sup>: [M+H]<sup>+</sup>, 465.0800, found: 465.0800.

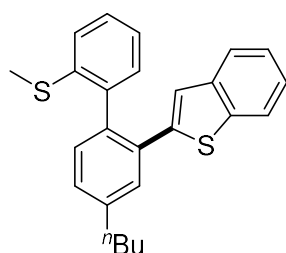

**2-(4-Butyl-2'-(methylthio)-[1,1'-biphenyl]-2-yl)benzo[b]thiophene (4m)**

Purification by column chromatography on silica gel (Petroleum ether/CH<sub>2</sub>Cl<sub>2</sub> = 10/1, v/v) afforded the desired product **4m** as a yellow solid (40.6 mg, 52%). <sup>1</sup>H NMR (300 MHz, CDCl<sub>3</sub>): δ = 7.69-7.66 (m, 1H), 7.58-7.54 (m, 2H), 7.34-7.28 (m, 1H), 7.26-7.17 (m, 5H), 7.16-7.07 (m, 2H), 6.95 (s, 1H), 2.72 (t, *J* = 7.8 Hz, 2H), 2.29 (s, 3H), 1.75-1.65 (m, 2H), 1.50-1.37 (m, 2H), 0.97 (t, *J* = 7.5 Hz, 3H) ppm; <sup>13</sup>C{<sup>1</sup>H} NMR (75 MHz, CDCl<sub>3</sub>): δ = 143.6, 143.1, 140.3, 140.1, 139.8, 138.7, 136.3, 133.5, 131.2, 130.7, 130.3, 128.3, 128.2, 124.9, 124.7, 124.0, 123.9, 123.5, 122.8, 122.0, 35.6, 33.6, 22.7, 15.8, 14.2 ppm. HRMS (ESI<sup>+</sup>): calcd for C<sub>25</sub>H<sub>25</sub>S<sub>2</sub><sup>+</sup>: [M+H]<sup>+</sup>, 389.1393, found: 389.1395.

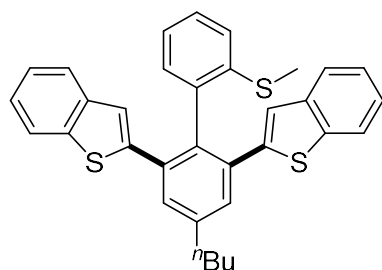

**2,2'-(4-Butyl-2'-(methylthio)-[1,1'-biphenyl]-2,6-diyl)bis(benzo[b]thiophene) (4m')**

Purification by column chromatography on silica gel (Petroleum ether/CH<sub>2</sub>Cl<sub>2</sub> = 5/1, v/v) afforded the desired product **4m'** as a yellow solid (12.8 mg, 12%). <sup>1</sup>H NMR (300

MHz, CDCl<sub>3</sub>):  $\delta$  = 7.69-7.66 (m, 2H), 7.59-7.56 (m, 2H), 7.54 (s, 2H), 7.24-7.17 (m, 5H), 7.14-7.07 (m, 2H), 7.03-6.98 (m, 1H), 6.95 (s, 2H), 2.75 (t,  $J$  = 7.8 Hz, 2H), 2.21 (s, 3H), 1.79-1.69 (m, 2H), 1.51-1.45 (m, 2H), 0.98 (t,  $J$  = 7.2 Hz, 3H) ppm; <sup>13</sup>C{<sup>1</sup>H} NMR (75 MHz, CDCl<sub>3</sub>):  $\delta$  = 143.4, 143.1, 140.5, 140.0, 139.9, 137.6, 135.1, 135.0, 131.8, 130.9, 128.8, 125.3, 124.8, 124.0, 123.9, 123.6, 123.5, 122.0, 35.5, 33.5, 22.7, 15.8, 14.2 ppm. HRMS (ESI<sup>+</sup>): calcd for C<sub>33</sub>H<sub>29</sub>S<sub>3</sub><sup>+</sup>: [M+H]<sup>+</sup>, 521.1426, found: 521.1427.

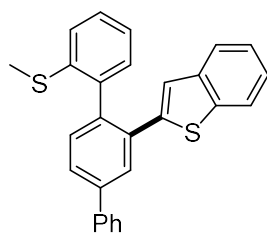

**2-(2-(Methylthio)-[1,1':4',1''-terphenyl]-2'-yl)benzo[b]thiophene (4n)**

Purification by column chromatography on silica gel (Petroleum ether/CH<sub>2</sub>Cl<sub>2</sub> = 10/1, v/v) afforded the desired product **4n** as a yellow solid (35.2 mg, 43%). <sup>1</sup>H NMR (300 MHz, CDCl<sub>3</sub>):  $\delta$  = 7.95 (d,  $J$  = 1.8 Hz, 1H), 7.70-7.68 (m, 3H), 7.65-7.56 (m, 2H), 7.46 (t,  $J$  = 6.9 Hz, 2H), 7.40 (d,  $J$  = 7.8 Hz, 1H), 7.37-7.29 (m, 2H), 7.25-7.15 (m, 4H), 7.14-7.08 (m, 1H), 7.02 (s, 1H), 2.29 (s, 3H) ppm; <sup>13</sup>C{<sup>1</sup>H} NMR (75 MHz, CDCl<sub>3</sub>):  $\delta$  = 143.2, 141.2, 140.4, 140.0, 139.5, 138.6, 137.9, 134.3, 131.8, 130.6, 129.00, 128.96, 128.5, 127.7, 127.3, 126.7, 125.1, 124.7, 124.11, 124.05, 123.6, 123.1, 122.0, 15.8 ppm. HRMS (ESI<sup>+</sup>): calcd for C<sub>27</sub>H<sub>22</sub>S<sub>2</sub><sup>+</sup>: [M+H]<sup>+</sup>, 409.1080, found: 409.1082.

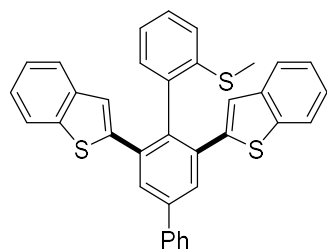

**2,2'-(2-(Methylthio)-[1,1':4',1''-terphenyl]-2',6'-diyl)bis(benzo[b]thiophene) (4n')**

Purification by column chromatography on silica gel (Petroleum ether/CH<sub>2</sub>Cl<sub>2</sub> = 5/1, v/v) afforded the desired product **4n'** as a yellow solid (12.0 mg, 11%). <sup>1</sup>H NMR (300 MHz, CDCl<sub>3</sub>):  $\delta$  = 7.95 (s, 2H), 7.77-7.69 (m, 4H), 7.63-7.60 (m, 2H), 7.51 (t,  $J$  = 6.9 Hz, 2H), 7.42 (t,  $J$  = 7.5 Hz, 2H), 7.28 (dd,  $J$  = 7.2, 1.8 Hz, 2H), 7.25-7.23 (m, 2H), 7.19-7.12 (m, 2H), 7.07 (dd,  $J$  = 7.5, 1.5 Hz, 1H), 7.03 (s, 2H), 2.25 (s, 3H) ppm. <sup>13</sup>C{<sup>1</sup>H}

NMR (75 MHz, CDCl<sub>3</sub>):  $\delta$  = 143.1, 141.3, 140.6, 140.0, 139.92, 139.86, 137.3, 136.6, 135.9, 131.7, 129.5, 129.1, 129.0, 128.0, 127.4, 125.4, 124.9, 124.14, 124.10, 123.8, 123.7, 122.02, 15.9 ppm. HRMS (ESI<sup>+</sup>): calcd for C<sub>35</sub>H<sub>25</sub>S<sub>3</sub><sup>+</sup>: [M+H]<sup>+</sup>, 541.1113, found: 541.1112.

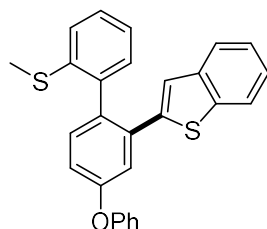

**2-(2'-(Methylthio)-4-phenoxy-[1,1'-biphenyl]-2-yl)benzo[*b*]thiophene (4o)**

Purification by column chromatography on silica gel (Petroleum ether/CH<sub>2</sub>Cl<sub>2</sub> = 10/1, v/v) afforded the desired product **4o** as a yellow solid (34.5 mg, 41%). <sup>1</sup>H NMR (300 MHz, CDCl<sub>3</sub>):  $\delta$  = 7.63-7.61 (m, 1H), 7.54-7.51 (m, 1H), 7.38-7.32 (m, 3H), 7.29-7.23 (m, 2H), 7.20-7.16 (m, 3H), 7.14-7.08 (m, 5H), 7.00 (dd, *J* = 8.4, 2.4 Hz, 1H), 6.92 (s, 1H), 2.27 (s, 3H) ppm. <sup>13</sup>C{<sup>1</sup>H} NMR (75 MHz, CDCl<sub>3</sub>):  $\delta$  = 157.3, 156.7, 142.6, 140.4, 139.9, 139.2, 138.9, 135.4, 133.7, 132.7, 130.8, 130.0, 128.5, 124.9, 124.7, 124.13, 124.11, 123.9, 123.7, 123.2, 122.0, 119.8, 119.5, 117.8, 15.7 ppm. HRMS (ESI<sup>+</sup>): calcd for C<sub>27</sub>H<sub>21</sub>OS<sub>2</sub><sup>+</sup>: [M+H]<sup>+</sup>, 425.1029, found: 425.1030.

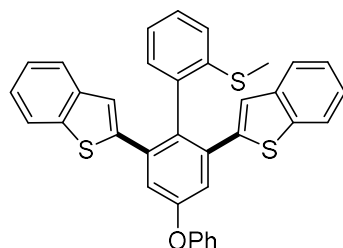

**2,2'-(2'-(Methylthio)-4-phenoxy-[1,1'-biphenyl]-2,6-diyl)bis(benzo[*b*]thiophene) (4o')**

Purification by column chromatography on silica gel (Petroleum ether/CH<sub>2</sub>Cl<sub>2</sub> = 5/1, v/v) afforded the desired product **4o'** as a yellow solid (11.5 mg, 10%). <sup>1</sup>H NMR (300 MHz, CDCl<sub>3</sub>):  $\delta$  = 7.69-7.66 (m, 2H), 7.60-7.57 (m, 2H), 7.45-7.39 (m, 2H), 7.37 (s, 2H), 7.28 (dd, *J* = 7.8, 1.2 Hz, 1H), 7.25-7.16 (m, 7H), 7.14-7.10 (m, 2H), 7.07-7.01 (m, 1H), 6.96 (s, 2H), 2.25 (s, 3H) ppm. <sup>13</sup>C{<sup>1</sup>H} NMR (75 MHz, CDCl<sub>3</sub>):  $\delta$  = 157.0, 156.4, 142.5, 140.6, 140.3, 139.7, 137.0, 136.9, 132.4, 132.0, 130.1, 129.0, 125.2, 124.8,

124.2, 124.1, 123.8, 123.7, 122.0, 120.1, 119.7, 15.8 ppm. HRMS (ESI<sup>+</sup>): calcd for C<sub>35</sub>H<sub>25</sub>OS<sub>3</sub><sup>+</sup>: [M+H]<sup>+</sup>, 557.1063, found: 557.1066.

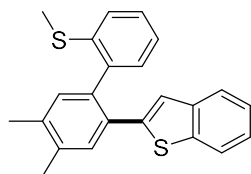

**2-(4,5-Dimethyl-2'-(methylthio)-[1,1'-biphenyl]-2-yl)benzo[b]thiophene (4p)**

Purification by column chromatography on silica gel (Petroleum ether/CH<sub>2</sub>Cl<sub>2</sub> = 10/1, v/v) afforded the desired product **4p** as a yellow solid (46.8 mg, 65%). <sup>1</sup>H NMR (300 MHz, CDCl<sub>3</sub>): δ = 7.68 (d, *J* = 6.6 Hz, 1H), 7.58-7.52 (m, 2H), 7.35-7.30 (m, 1H), 7.24-7.19 (m, 3H), 7.13 (d, *J* = 10.2 Hz, 3H), 6.92 (s, 1H), 2.36 (s, 3H), 2.32 (s, 3H), 2.28 (s, 3H) ppm; <sup>13</sup>C{<sup>1</sup>H} NMR (75 MHz, CDCl<sub>3</sub>) δ = 143.6, 140.4, 140.2, 139.9, 138.7, 136.9, 136.4, 132.5, 131.4, 131.2, 130.7, 128.4, 127.2, 124.9, 124.7, 124.1, 123.9, 123.5, 122.4, 122.1, 19.9, 19.8, 15.9 ppm. HRMS (ESI<sup>+</sup>): calcd for C<sub>23</sub>H<sub>21</sub>S<sub>2</sub><sup>+</sup>: [M+H]<sup>+</sup>, 361.1080, found: 361.1075.

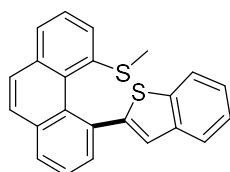

**2-(5-(Methylthio)phenanthren-4-yl)benzo[b]thiophene (4q)**

Purification by column chromatography on silica gel (Petroleum ether/CH<sub>2</sub>Cl<sub>2</sub> = 20/1, v/v) afforded the desired product **4q** as a yellow solid (38.5 mg, 54%). <sup>1</sup>H NMR (300 MHz, CDCl<sub>3</sub>): δ = 7.83-7.75 (m, 3H), 7.69 (d, *J* = 7.5 Hz, 1H), 7.64-7.59 (m, 3H), 7.52-7.47 (m, 2H), 7.38 (d, *J* = 7.5 Hz, 1H), 7.26-7.24 (m, 2H), 6.85 (s, 1H), 2.00 (s, 3H) ppm; <sup>13</sup>C{<sup>1</sup>H} NMR (75 MHz, CDCl<sub>3</sub>): δ = 146.2, 140.2, 140.0, 139.6, 134.9, 134.8, 134.0, 130.9, 129.5, 128.4, 127.4, 127.2, 127.1, 127.0, 125.5, 124.3, 124.2, 123.7, 122.29, 122.25, 21.4 ppm. HRMS (ESI<sup>+</sup>): calcd for C<sub>23</sub>H<sub>17</sub>S<sub>2</sub><sup>+</sup>: [M+H]<sup>+</sup>, 357.0767, found: 357.0763.

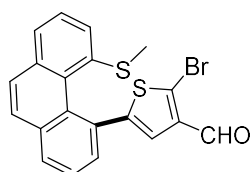

### 2-Bromo-5-(5-(methylthio)phenanthren-4-yl)thiophene-3-carbaldehyde (4r)

Purification by column chromatography on silica gel (Petroleum ether/CH<sub>2</sub>Cl<sub>2</sub> = 1/1, v/v) afforded the desired product **4r** as a yellow solid (45.4 mg, 55%). <sup>1</sup>H NMR (300 MHz, CDCl<sub>3</sub>): δ = 9.83 (s, 1H), 7.79 (dd, *J*<sub>1</sub> = 6.3 Hz, *J*<sub>2</sub> = 3.0 Hz, 1H), 7.69 (dd, *J*<sub>1</sub> = 7.5 Hz, *J*<sub>2</sub> = 0.9 Hz, 1H), 7.63-7.59 (m, 3H), 7.53 (t, *J* = 7.5 Hz, 1H), 7.43 (dd, *J*<sub>1</sub> = 7.5 Hz, *J*<sub>2</sub> = 1.5 Hz, 1H), 7.02 (s, 1H), 2.11 (s, 3H) ppm; <sup>13</sup>C{<sup>1</sup>H} NMR (75 MHz, CDCl<sub>3</sub>): δ = 184.8, 147.8, 139.1, 138.4, 134.8, 134.0, 132.8, 130.0, 128.9, 128.4, 127.8, 127.7, 127.6, 127.1, 127.0, 126.8, 125.8, 124.4, 123.3, 21.1 ppm. HRMS (ESI<sup>+</sup>): calcd for C<sub>20</sub>H<sub>14</sub><sup>79</sup>BrOS<sub>2</sub><sup>+</sup>: [M+H]<sup>+</sup>, 412.9664, found: 412.9642; HRMS (ESI<sup>+</sup>): calcd for C<sub>20</sub>H<sub>14</sub><sup>81</sup>BrOS<sub>2</sub><sup>+</sup>: [M+H]<sup>+</sup>, 414.9644, found: 414.9655.

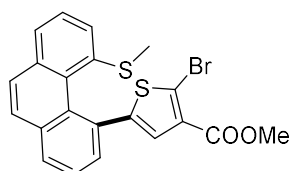

### Methyl 2-bromo-5-(5-(methylthio)phenanthren-4-yl)thiophene-3-carboxylate (4s)

Purification by column chromatography on silica gel (Petroleum ether/CH<sub>2</sub>Cl<sub>2</sub> = 5/1, v/v) afforded the desired product **4s** as a yellow solid (54.1 mg, 61%). <sup>1</sup>H NMR (300 MHz, CDCl<sub>3</sub>): δ = 7.66 (dd, *J*<sub>1</sub> = 6.3 Hz, *J*<sub>2</sub> = 2.7 Hz, 1H), 7.69-7.66 (m, 1H), 7.62-7.59 (m, 4H), 7.52-7.50 (m, 1H), 7.43 (dd, *J*<sub>1</sub> = 7.5 Hz, *J*<sub>2</sub> = 0.9 Hz, 1H), 7.05 (s, 1H), 3.79 (s, 3H), 2.12 (s, 3H) ppm; <sup>13</sup>C{<sup>1</sup>H} NMR (75 MHz, CDCl<sub>3</sub>): δ = 162.6, 146.5, 139.4, 134.7, 134.0, 133.1, 130.6, 130.0, 128.8, 128.1, 127.6, 127.44, 127.39, 127.1, 127.0, 126.8, 126.7, 125.5, 118.8, 51.9, 21.0 ppm. HRMS (ESI<sup>+</sup>): calcd for C<sub>21</sub>H<sub>16</sub><sup>79</sup>BrO<sub>2</sub>S<sub>2</sub><sup>+</sup>: [M+H]<sup>+</sup>, 442.9770, found: 442.9742 ppm; HRMS (ESI<sup>+</sup>): calcd for C<sub>21</sub>H<sub>16</sub><sup>81</sup>BrO<sub>2</sub>S<sub>2</sub><sup>+</sup>: [M+H]<sup>+</sup>, 444.9750, found: 444.9747.

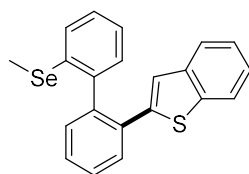

### 2-(2'-(Methylselanyl)-[1,1'-biphenyl]-2-yl)benzo[b]thiophene (6a)

Purification by column chromatography on silica gel (Petroleum ether/CH<sub>2</sub>Cl<sub>2</sub> = 20/1, v/v) afforded the desired product **6a** as a yellow solid (31.2 mg, 41%). <sup>1</sup>H NMR (300

MHz, CDCl<sub>3</sub>):  $\delta$  = 7.73-7.67 (m, 2H), 7.59-7.56 (m, 1H), 7.49-7.46 (m, 1H), 7.44-7.43 (m, 1H), 7.41-7.38 (m, 1H), 7.33 (d,  $J$  = 6.6 Hz, 2H), 7.30-7.27 (m, 1H), 7.24-7.23 (m, 1H), 7.22-7.20 (m, 1H), 7.15 (d,  $J$  = 3.9 Hz, 1H), 6.95 (s, 1H) 2.15 (s, 3H) ppm; <sup>13</sup>C{<sup>1</sup>H} NMR (75 MHz, CDCl<sub>3</sub>):  $\delta$  = 143.1, 141.9, 140.4, 140.03, 139.98, 133.7, 133.5, 131.2, 130.5, 130.3, 128.54, 128.48, 128.4, 128.0, 125.7, 124.1, 123.6, 123.2, 122.6, 122.0, 6.9 ppm. HRMS (ESI<sup>+</sup>): calcd for C<sub>21</sub>H<sub>17</sub>SSe<sup>+</sup>: [M+H]<sup>+</sup>, 381.0211, found: 381.0211.

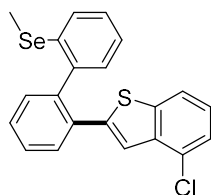

**4-Chloro-2-(2'-(methylselanyl)-[1,1'-biphenyl]-2-yl)benzo[b]thiophene (6b)**

Purification by column chromatography on silica gel (Petroleum ether/CH<sub>2</sub>Cl<sub>2</sub> = 20/1, v/v) afforded the desired product **6b** as a yellow solid (55.9 mg, 68%). <sup>1</sup>H NMR (300 MHz, CDCl<sub>3</sub>):  $\delta$  = 7.76 (dd,  $J_1$  = 1.8 Hz,  $J_2$  = 7.5 Hz, 1H), 7.56 (d,  $J_1$  = 7.2 Hz, 1H), 7.50-7.42 (m, 3H), 7.38-7.31 (m, 3H), 7.24-7.22 (m, 1H), 7.19-7.14 (m, 3H), 2.18 (s, 3H) ppm; <sup>13</sup>C{<sup>1</sup>H} NMR (75 MHz, CDCl<sub>3</sub>):  $\delta$  = 144.2, 141.7, 141.5, 140.1, 138.2, 133.7, 133.1, 131.2, 130.5, 130.2, 129.2, 128.7, 128.59, 128.55, 128.5, 128.4, 125.8, 124.7, 124.1, 121.4, 120.6, 7.0 ppm. HRMS (ESI<sup>+</sup>): calcd for C<sub>21</sub>H<sub>16</sub><sup>35</sup>ClSSe<sup>+</sup>: [M+H]<sup>+</sup>, 414.9821, found: 414.9820; HRMS (ESI<sup>+</sup>): calcd for C<sub>21</sub>H<sub>16</sub><sup>37</sup>ClSSe<sup>+</sup>: [M+H]<sup>+</sup>, 416.9792, found: 416.9795.

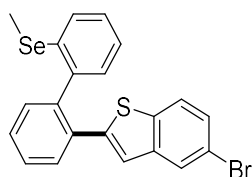

**5-Bromo-2-(2'-(methylselanyl)-[1,1'-biphenyl]-2-yl)benzo[b]thiophene (6c)**

Purification by column chromatography on silica gel (Petroleum ether/CH<sub>2</sub>Cl<sub>2</sub> = 20/1, v/v) afforded the desired product **6c** as a yellow solid (56.8 mg, 62%). <sup>1</sup>H NMR (300 MHz, CDCl<sub>3</sub>):  $\delta$  = 7.56-7.54 (m, 2H), 7.40-7.33 (m, 2H), 7.31-7.28 (m, 1H), 7.21-7.14 (m, 4H), 7.05-6.98 (m, 2H), 6.68 (s, 1H), 2.01 (s, 3H) ppm; <sup>13</sup>C{<sup>1</sup>H} NMR (75 MHz, CDCl<sub>3</sub>):  $\delta$  = 145.0, 141.6, 140.0, 138.9, 133.5, 133.1, 131.2, 130.4, 130.3, 128.7, 128.6, 128.4, 128.3, 127.0, 126.1, 125.7, 123.4, 122.3, 118.1, 6.9 ppm. HRMS (ESI<sup>+</sup>): calcd



for  $\text{C}_{21}\text{H}_{16}^{79}\text{BrSSe}^+$ :  $[\text{M}+\text{H}]^+$ , 458.9316, found: 458.9309; HRMS ( $\text{ESI}^+$ ): calcd for  $\text{C}_{21}\text{H}_{16}^{81}\text{BrSSe}^+$ :  $[\text{M}+\text{H}]^+$ , 460.9296, found: 460.9295.

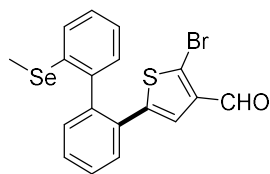

**2-Bromo-5-(2'-(methylselanyl)-[1,1'-biphenyl]-2-yl)thiophene-3-carbaldehyde (6d)**

Purification by column chromatography on silica gel (Petroleum ether/ $\text{CH}_2\text{Cl}_2$  = 2/1, v/v) afforded the desired product **6d** as a yellow solid (27.9 mg, 32%).  $^1\text{H}$  NMR (300 MHz,  $\text{DMSO}-d_6$ ):  $\delta$  = 9.71 (s, 1H), 7.76 (d,  $J$  = 6.6 Hz, 1H), 7.51-7.48 (m, 2H), 7.42-7.38 (m, 2H), 7.26-7.24 (m, 3H), 7.11 (d,  $J$  = 7.5 Hz, 1H), 2.18 (s, 3H) ppm;  $^{13}\text{C}\{^1\text{H}\}$  NMR (75 MHz,  $\text{DMSO}-d_6$ ):  $\delta$  = 184.7, 143.4, 139.9, 138.7, 137.6, 133.6, 131.0, 130.8, 130.3, 129.3, 128.9, 128.8, 127.9, 125.7, 124.8, 124.1, 6.1 ppm. HRMS ( $\text{ESI}^+$ ): calcd for  $\text{C}_{18}\text{H}_{14}^{79}\text{BrOSSe}^+$ :  $[\text{M}+\text{Na}]^+$ , 458.8928, found: 458.8936; HRMS ( $\text{ESI}^+$ ): calcd for  $\text{C}_{18}\text{H}_{14}^{81}\text{BrOSSe}^+$ :  $[\text{M}+\text{Na}]^+$ , 460.8908, found: 460.8905.

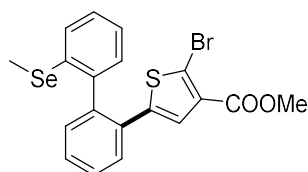

**Methyl 2-bromo-5-(2'-(methylselanyl)-[1,1'-biphenyl]-2-yl)thiophene-3-carboxylate (6e)**

Purification by column chromatography on silica gel (Petroleum ether/ $\text{CH}_2\text{Cl}_2$  = 5/1, v/v) afforded the desired product **6e** as a yellow solid (27.9 mg, 30%).  $^1\text{H}$  NMR (300 MHz,  $\text{CDCl}_3$ ):  $\delta$  = 7.54-7.51 (m, 1H), 7.40-7.30 (m, 3H), 7.28 (s, 1H), 7.22-7.18 (m, 1H), 7.15-7.11 (m, 2H), 7.02 (d,  $J$  = 7.5 Hz, 1H), 3.75 (s, 3H), 2.10 (s, 3H) ppm;  $^{13}\text{C}\{^1\text{H}\}$  NMR (75 MHz,  $\text{CDCl}_3$ ):  $\delta$  = 162.6, 142.8, 140.9, 139.3, 133.9, 132.1, 131.1, 130.5, 130.3, 129.1, 129.0, 128.7, 128.4, 127.6, 125.8, 100.1, 51.9, 6.8 ppm. HRMS ( $\text{ESI}^+$ ): calcd for  $\text{C}_{19}\text{H}_{16}^{79}\text{BrO}_2\text{SSe}^+$ :  $[\text{M}+\text{H}]^+$ , 466.9215, found: 466.9205; HRMS ( $\text{ESI}^+$ ): calcd for  $\text{C}_{19}\text{H}_{16}^{81}\text{BrO}_2\text{SSe}^+$ :  $[\text{M}+\text{H}]^+$ , 468.9194, found: 468.9198.

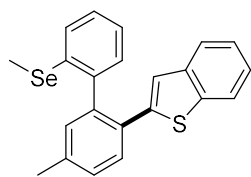

### 2-(5-Methyl-2'-(methylnelanyl)-[1,1'-biphenyl]-2-yl)benzo[b]thiophene (**6f**)

Purification by column chromatography on silica gel (Petroleum ether/CH<sub>2</sub>Cl<sub>2</sub> = 20/1, v/v) afforded the desired product **6f** as a yellow solid (35.4 mg, 45%). <sup>1</sup>H NMR (300 MHz, CDCl<sub>3</sub>):  $\delta$  = 7.43 (d,  $J$  = 7.2 Hz, 1H), 7.36 (d,  $J$  = 7.8 Hz, 1H), 7.33-7.30 (m, 1H), 7.06-7.00 (m, 3H), 7.01-6.94 (m, 2H), 6.91-6.90 (m, 3H), 6.66 (s, 1H), 2.17 (s, 3H), 1.90 (s, 3H) ppm; <sup>13</sup>C{<sup>1</sup>H} NMR (75 MHz, CDCl<sub>3</sub>):  $\delta$  = 143.2, 141.9, 140.3, 140.1, 139.7, 138.0, 133.5, 131.8, 130.8, 130.5, 130.2, 129.3, 128.5, 128.2, 125.6, 124.0, 123.9, 123.5, 122.7, 122.0, 21.3, 6.9 ppm. HRMS (ESI<sup>+</sup>): calcd for C<sub>22</sub>H<sub>19</sub>SSe<sup>+</sup>: [M+H]<sup>+</sup>, 395.0368, found: 395.0365.

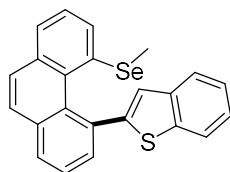

### 2-(5-(Methylnelanyl)phenanthren-4-yl)benzo[b]thiophene (**6g**)

Purification by column chromatography on silica gel (Petroleum ether/CH<sub>2</sub>Cl<sub>2</sub> = 20/1, v/v) afforded the desired product **6g** as a yellow solid (32.2 mg, 40%). <sup>1</sup>H NMR (300 MHz, CDCl<sub>3</sub>):  $\delta$  = 7.84 (dd,  $J_1$  = 7.2 Hz,  $J_2$  = 0.9 Hz, 1H), 7.83-7.72 (m, 3H), 7.64-7.60 (m, 3H), 7.55-7.51 (m, 2H), 7.45 (t,  $J$  = 7.5 Hz, 1H), 7.27-7.24 (m, 2H), 6.97 (s, 1H), 1.83 (s, 3H) ppm; <sup>13</sup>C{<sup>1</sup>H} NMR (75 MHz, CDCl<sub>3</sub>)  $\delta$  = 145.1, 140.0, 139.8, 135.3, 134.8, 134.6, 133.8, 132.7, 132.3, 131.1, 129.6, 127.5, 127.31, 127.3, 127.2, 127.0, 126.3, 124.6, 124.4, 123.9, 123.8, 122.2, 12.8 ppm. HRMS (ESI<sup>+</sup>): calcd for C<sub>23</sub>H<sub>17</sub>SSe<sup>+</sup>: [M+H]<sup>+</sup>, 405.0211, found: 405.0208.

## V. Scale-up synthesis

A 100 mL Schlenk tube with a magnetic stir bar was charged with thioether- or selenoether-substituted biaryls (**1** or **5**, 2.0 mmol, 1.0 equiv), benzo[b]thiophene **2a** (6.0

mmol, 3.0 equiv),  $\text{Cp}^*\text{Rh}(\text{MeCN})_3[\text{SbF}_6]_2$  (3.0 mol%),  $\text{Ag}_2\text{O}$  (7.0 mmol, 3.5 equiv),  $\text{PivOH}$  (4.0 mmol, 2.0 equiv) and  $\text{DCE}$  (10.0 mL) under  $\text{N}_2$  atmosphere. The resulting mixture was stirred at 120 °C for 24 h and then diluted with 20 mL of  $\text{CH}_2\text{Cl}_2$ . The solution was filtered through a celite pad and washed with 25-50 mL of  $\text{CH}_2\text{Cl}_2$ . The filtrate was concentrated under vacuum and the residue was purified by column chromatography on silica gel column to provide the desired product.

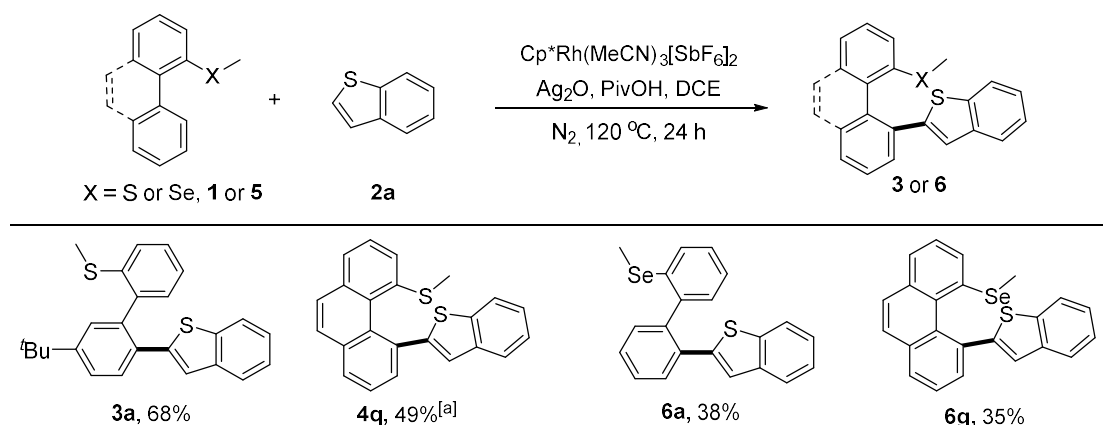

Reaction conditions: **1** or **5** (2.0 mmol, 1.0 equiv), **2a** (6.0 mmol, 3.0 equiv),  $\text{Cp}^*\text{Rh}(\text{MeCN})_3[\text{SbF}_6]_2$  (3.0 mol%),  $\text{Ag}_2\text{O}$  (3.5 equiv) and  $\text{PivOH}$  (2.0 equiv) in  $\text{DCE}$  (10.0 mL) at 120 °C for 24 h under  $\text{N}_2$  atmosphere. [a].  $\text{PivOH}$  (1.0 equiv).

**Scheme S4.** Scale-up synthesis.

## VI. General procedure for the recovery experiment of Ag salt

Two 100 mL Schlenk tube with a magnetic stir bar were charged with (3'-(*tert*-butyl)-[1,1'-biphenyl]-2-yl)(methyl)sulfane (**1a**, 2.0 mmol, 1.0 equiv), benzo[*b*]thiophene (**2a**, 6.0 mmol, 3.0 equiv),  $\text{Cp}^*\text{Rh}(\text{MeCN})_3[\text{SbF}_6]_2$  (53 mg, 3 mol%),  $\text{Ag}_2\text{O}$  (1.62 g, 7.0 mmol),  $\text{PivOH}$  (408 mg, 4.0 mmol) and  $\text{DCE}$  (10.0 mL) under an  $\text{N}_2$  atmosphere at 120 °C for 24 h and then diluted with 50 mL of  $\text{CH}_2\text{Cl}_2$ . The solution was filtered through a celite pad and washed with 50–60 mL of  $\text{CH}_2\text{Cl}_2$ . The celite pad with the silver residue was dissolved in 100 mL of  $\text{HNO}_3$  (2 mol/L). After being stirred for 4 h at room temperature, the 120 mL of  $\text{NaOH}$  (2 mol/L) was then added. The solution was stirred at room temperature for 2 h. The suspension was filtered, and the solid residue was washed with water ( $3 \times 20$  mL) to afford  $\text{Ag}_2\text{O}$  (2.6 g) as a black powder. Since these two reaction tubes were processed simultaneously, the initial mass of  $\text{Ag}_2\text{O}$  added was

3.24 g (1.62 g $\times$ 2). Subsequently, the recovery rate of Ag<sub>2</sub>O was determined to be 80% (2.6 g/3.24 g).

A 25 mL Schlenk tube with a magnetic stir bar was charged with (3'-(*tert*-butyl)-[1,1'-biphenyl]-2-yl)(methyl)sulfane (**1a**, 0.2 mmol, 1.0 equiv), benzo[*b*]thiophene (**2a**, 0.6 mmol, 3.0 equiv), (Cp\**Rh*(MeCN)<sub>3</sub>[SbF<sub>6</sub>]<sub>2</sub>) (5.3 mg, 3 mol%), regenerated Ag<sub>2</sub>O (162.2 mg, 0.7 mmol), PivOH (40.8 mg, 0.4 mmol) and DCE (1.0 mL) under N<sub>2</sub> atmosphere at 120 °C for 24 h. and then diluted with 10 mL of CH<sub>2</sub>Cl<sub>2</sub>. The solution was filtered through a celite pad and washed with 10-25 mL of CH<sub>2</sub>Cl<sub>2</sub>. The filtrate was concentrated under vacuum and the residue was purified by column chromatography on Silica gel column (Petroleum ether/CH<sub>2</sub>Cl<sub>2</sub> = 15/1, v/v) to provide **3a** in 73% yield.

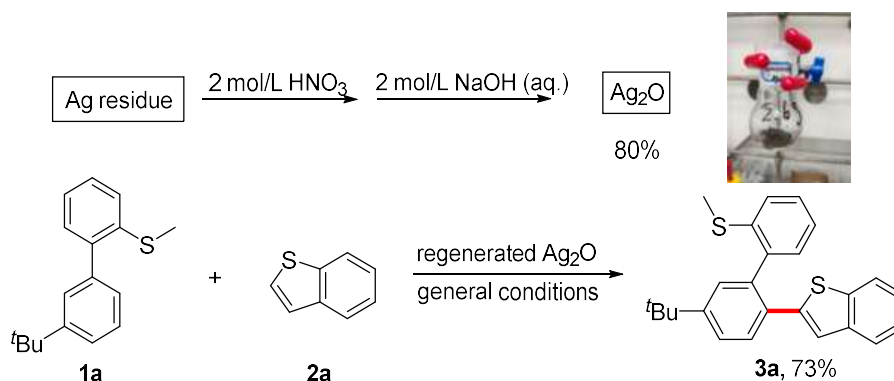

**Scheme S5.** Recovery experiment of Ag salt.

## VII. Mechanistic study

### (i) H/D exchange experiment.

A Schlenk tube with a magnetic stir bar was charged with Cp\**Rh*(MeCN)<sub>3</sub>[SbF<sub>6</sub>]<sub>2</sub> (5.3 mg, 3 mol%), Ag<sub>2</sub>O (162.2 mg, 0.7 mmol), PivOH (40.8 mg, 0.4 mmol), [1,1'-biphenyl]-2-yl(methyl)sulfane **1m** (40.0 mg, 0.2 mmol), D<sub>2</sub>O (72.4 μL, 20.0 equiv) and DCE (1.0 mL) under an N<sub>2</sub> atmosphere. The resulting solution was stirred at 120 °C for 4 h. After being cooled to room temperature, the mixture was diluted with 3 mL of CH<sub>2</sub>Cl<sub>2</sub>. The mixture was filtered through a celite pad and washed with 10-20 mL of CH<sub>2</sub>Cl<sub>2</sub>. The filtrate was concentrated and the residue was purified by column chromatography on silica gel (Petroleum ether/CH<sub>2</sub>Cl<sub>2</sub> = 20/1, v/v) to provide the

desired product. The deuterated ratio was calculated from  $^1\text{H}$  NMR analysis. The  $^1\text{H}$  NMR analysis showed that 12% hydrogen at the C2' position of [1,1'-biphenyl]-2-yl(methyl)sulfane **1m** was deuterated.

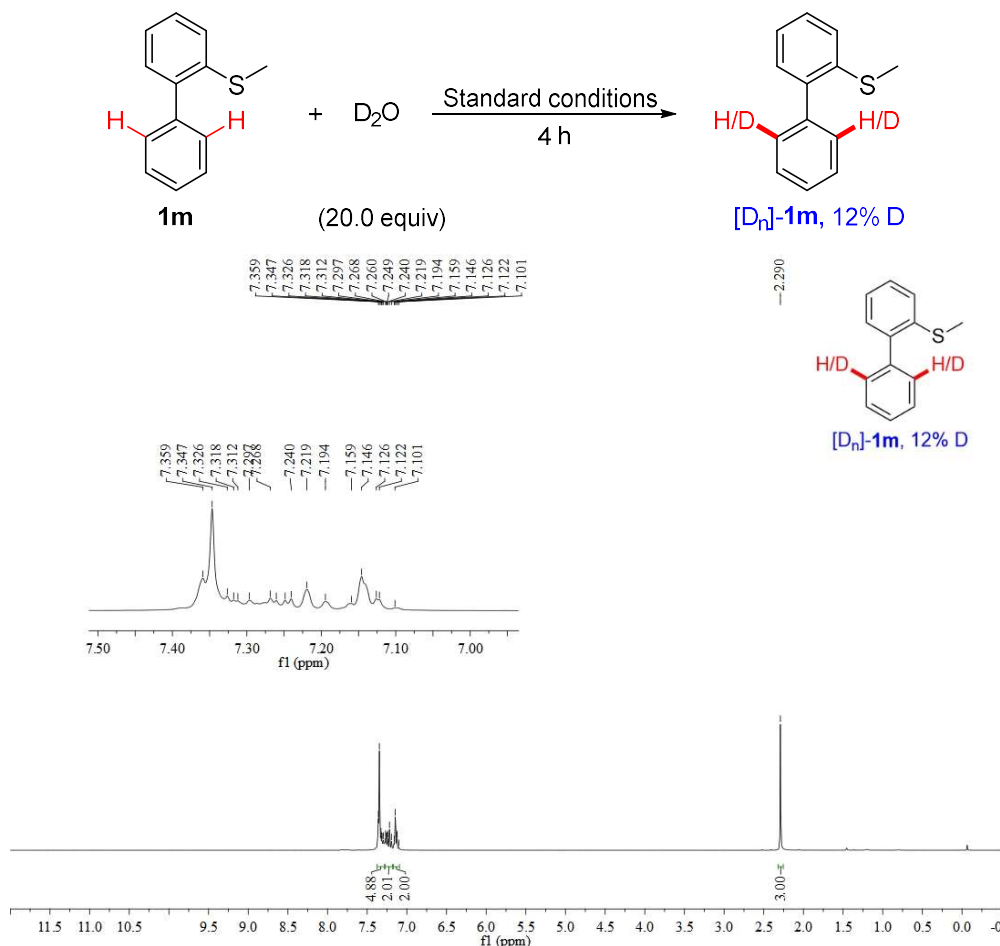

**Scheme S6.** H/D exchange experiment of the [1,1'-biphenyl]-2-yl(methyl)sulfane.

A Schlenk tube with a magnetic stir bar was charged with  $\text{Cp}^*\text{Rh}(\text{MeCN})_3[\text{SbF}_6]_2$  (5.3 mg, 3 mol%),  $\text{Ag}_2\text{O}$  (162.2 mg, 0.7 mmol),  $\text{PivOH}$  (40.8 mg, 0.4 mmol), benzo[*b*]thiophene **2a** (80.6 mg, 0.6 mmol, 1.0 equiv),  $\text{D}_2\text{O}$  (217.2  $\mu\text{L}$ , 20.0 equiv) and DCE (1.0 mL) under an  $\text{N}_2$  atmosphere. The resulting solution was stirred at 120  $^\circ\text{C}$  for 4 h. After being cooled to room temperature, the mixture was diluted with 3 mL of  $\text{CH}_2\text{Cl}_2$ . The mixture was filtered through a celite pad and washed with 10-20 mL of  $\text{CH}_2\text{Cl}_2$ . The filtrate was concentrated and the residue was purified by column chromatography on silica gel (Petroleum ether) to provide the desired product. The deuterated ratio was calculated from  $^1\text{H}$  NMR analysis. The  $^1\text{H}$  NMR analysis showed that 24% hydrogen at the C2 position of benzo[*b*]thiophene **2a** was deuterated.

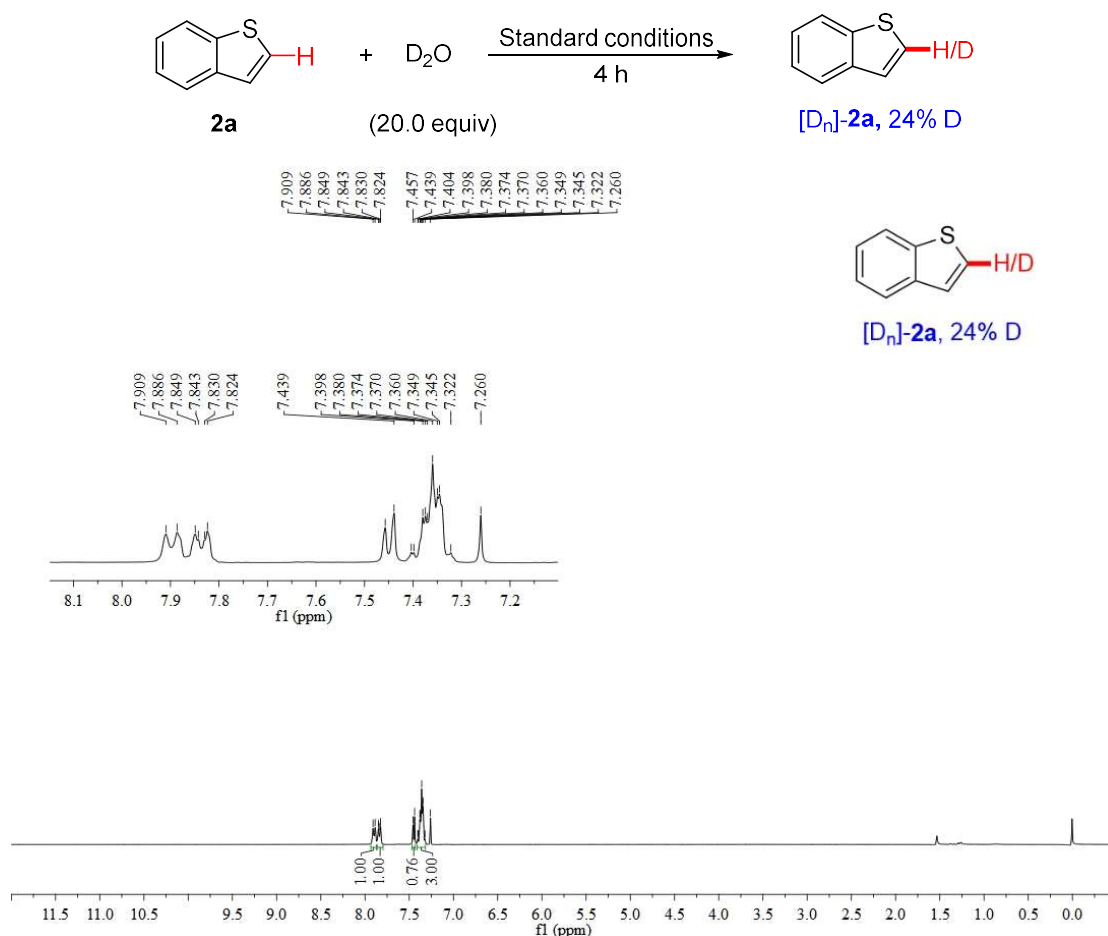

**Scheme S7.** H/D exchange experiment of the benzo[*b*]thiophene.

A Schlenk tube with a magnetic stir bar was charged with Cp<sup>\*</sup>Rh(MeCN)<sub>3</sub>[SbF<sub>6</sub>]<sub>2</sub> (5.3 mg, 3 mol%), Ag<sub>2</sub>O (162.2 mg, 0.7 mmol), PivOH (40.8 mg, 0.4 mmol), [1,1'-biphenyl]-2-yl(methyl)sulfane **1m** (40.0 mg, 0.2 mmol), benzo[*b*]thiophene **2a** (80.6 mg, 0.6 mmol), D<sub>2</sub>O (72.4 μL, 20.0 equiv) and DCE (1.0 mL) under an N<sub>2</sub> atmosphere. The resulting solution was stirred at 120 °C for 4 h. After being cooled to room temperature, the mixture was diluted with 3 mL of CH<sub>2</sub>Cl<sub>2</sub>. The mixture was filtered through a celite pad and washed with 10-20 mL of CH<sub>2</sub>Cl<sub>2</sub>. The filtrate was concentrated and the residue was purified by column chromatography on silica gel to provide the desired product. The deuterated ratio was calculated from <sup>1</sup>H NMR analysis. The <sup>1</sup>H NMR analysis showed that 20% hydrogen at the C2 position of benzo[*b*]thiophene **2a** was deuterated, the <sup>1</sup>H NMR analysis showed that 10% hydrogen at the C2' position of [1,1'-biphenyl]-2-yl(methyl)sulfane **1m** was deuterated.

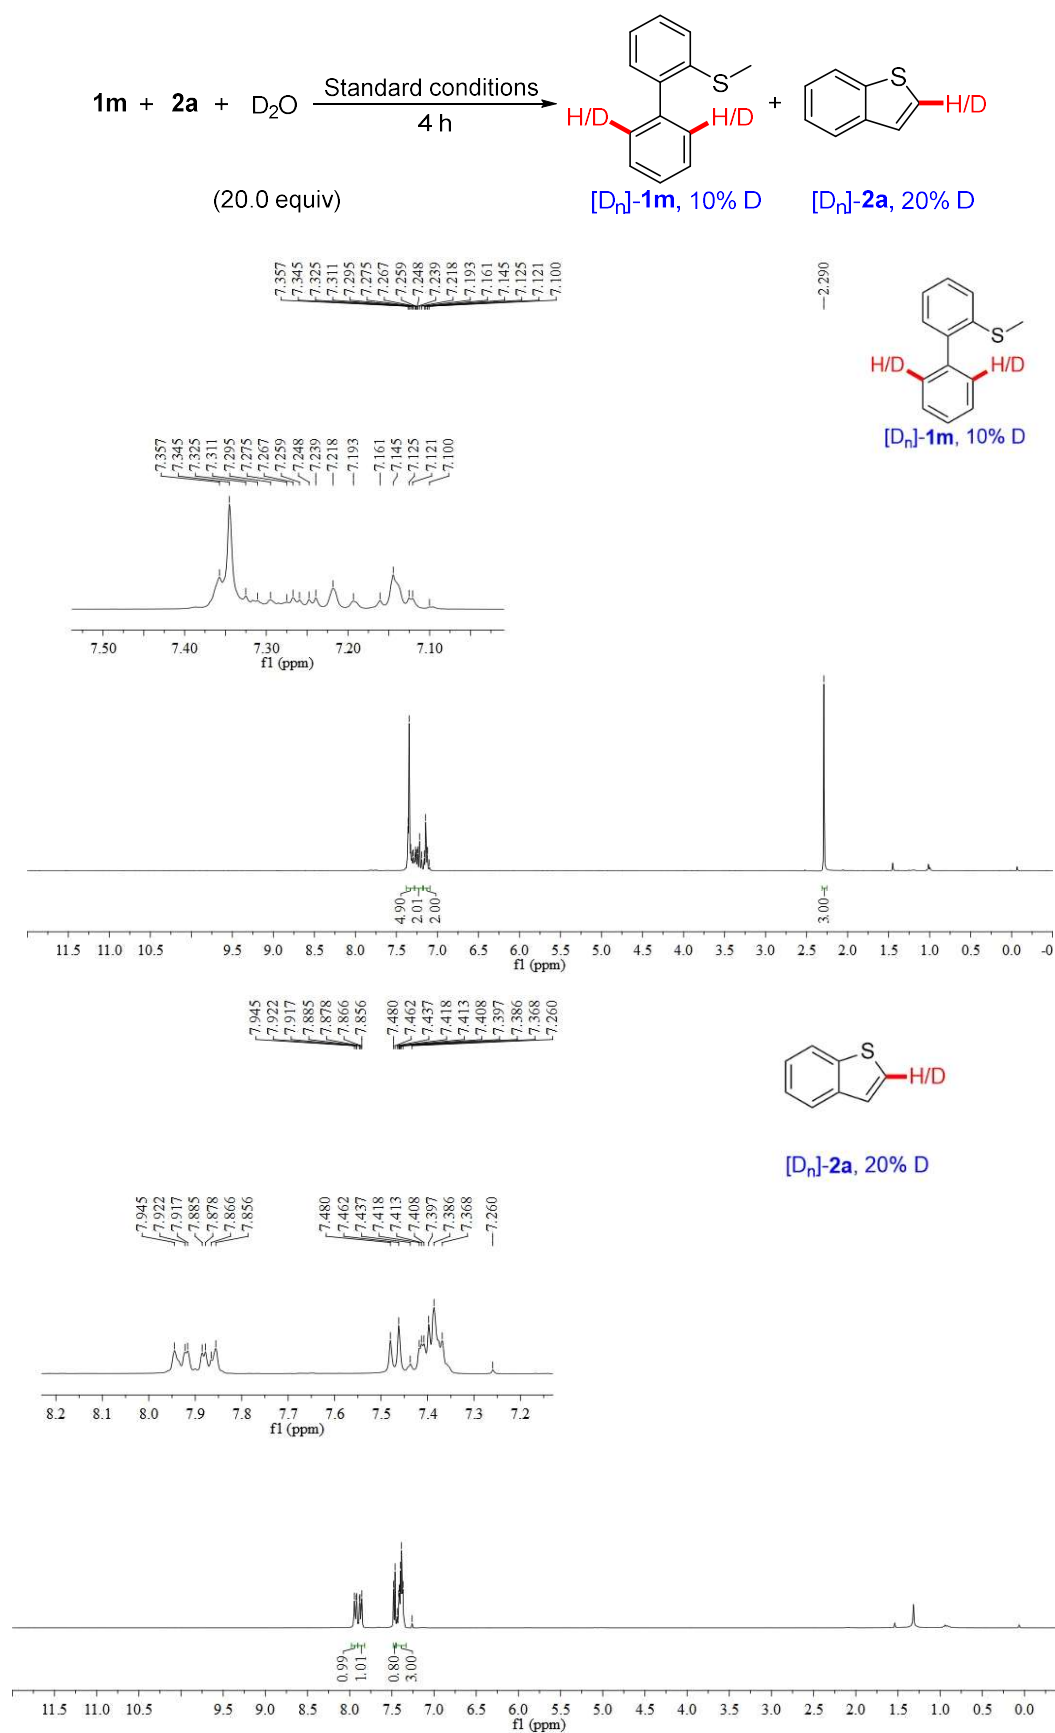

**Scheme S8.** H/D exchange experiment of the [1,1'-biphenyl]-2-yl(methyl)sulfane and benzo[*b*]thiophene.

(ii) Kinetic isotope experiments.

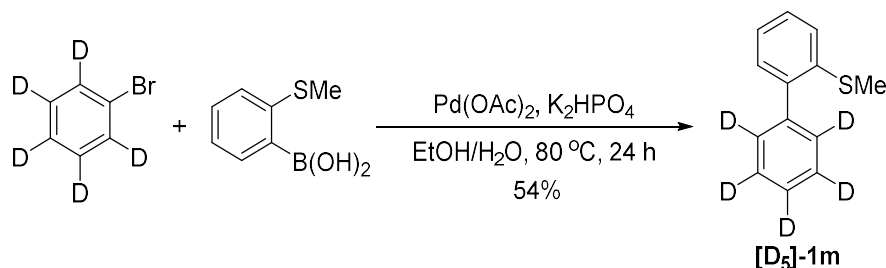

**Preparation of ([1,1'-biphenyl]-2-yl-2',3',4',5',6'-D<sub>5</sub>)(methyl)sulfane ([D<sub>5</sub>]-1m)<sup>[6]</sup>:** Bromobenzene-D<sub>5</sub> (2.0 mmol, 1.0 equiv), 2-methylthiophenylboronic acid (4.0 mmol, 2.0 equiv), Pd(OAc)<sub>2</sub> (10.0 mol%), K<sub>2</sub>HPO<sub>4</sub> (3.0 mmol, 1.5 equiv) was added to a 2-neck round-bottom flask. EtOH (6 mL) and distilled water (6 mL) was added under N<sub>2</sub> atmosphere. The resulting mixture was stirred at 80 °C for 24 h. After cooling to room temperature, then diluted the mixture with EtOAc and water. The aqueous layer was extracted with EtOAc three times. Collected organic layer was dried over anhydrous Na<sub>2</sub>SO<sub>4</sub>. The solvent was removed and the residue was purified by column chromatography on silica gel, eluting with Petroleum ether/CH<sub>2</sub>Cl<sub>2</sub> (20/1, v/v) to the desired product as a light-yellow oil liquid (220.2 mg, 54% yield). <sup>1</sup>H NMR (300 MHz, CDCl<sub>3</sub>): δ = 7.43-7.33 (m, 1H), 7.30-7.28 (m, 1H), 7.23-7.18 (m, 2H), 2.38 (s, 3H) ppm.

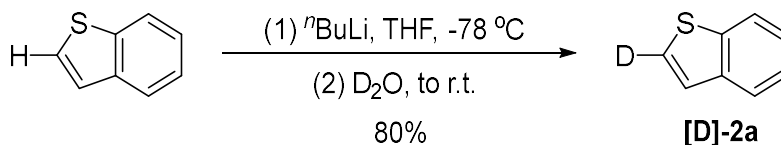

**Preparation of 2-deutero-benzothiophene ([D]-2a)<sup>[7]</sup>:** To a 200 mL two-neck round-bottom flask was added benzo[*b*]thiophene (**2a**, 20.0 mmol, 1.0 equiv) and anhydrous THF (40 mL). The solution was cooled to -78 °C and <sup>n</sup>BuLi (2.5 mol/L in THF, 30 mmol, 1.5 equiv) was added dropwise. After stirring for 2 hours at -78 °C, D<sub>2</sub>O (9 mL) was added. The mixture was allowed to stir at room temperature overnight, and then saturated aqueous NH<sub>4</sub>Cl solution was added. The organic layer was separated, washed with distilled water and aqueous NaHCO<sub>3</sub> solution, dried over Na<sub>2</sub>SO<sub>4</sub>, and concentrated in vacuo, the residue was purified by flash column chromatography on silica gel, eluting with Petroleum ether/EtOAc (20/1, v/v) to afford the desired product



as a white solid (2.15 g, 80% yield).  $^1\text{H}$  NMR (300 MHz,  $\text{CDCl}_3$ ):  $\delta$  = 7.92-7.90 (m, 1H), 7.86-7.84 (m, 1H), 7.42-7.33 (m, 3H) ppm.

(1) Two separated oven-dried Schlenk tube with a magnetic stir bar was charged with  $\text{Cp}^*\text{Rh}(\text{MeCN})_3[\text{SbF}_6]_2$  (5.3 mg, 3 mol%),  $\text{Ag}_2\text{O}$  (162.2 mg, 0.7 mmol), PivOH (40.8 mg, 0.4 mmol), [1,1'-biphenyl]-2-yl(methyl)sulfane **1m** (40.0 mg, 0.2 mmol, 1.0 equiv), benzo[*b*]thiophene **2a** or [D]-**2a** (0.6 mmol, 3.0 equiv) and DCE (1.0 mL) under an  $\text{N}_2$  atmosphere. The resulting solution was stirred at 120 °C for specified time (0.5 h, 1.0 h, 1.5 h, 2.0 h). After being cooled to room temperature, the mixture was diluted with 3 mL of  $\text{CH}_2\text{Cl}_2$ . The mixture was filtered through a celite pad and washed with 10-20 mL of  $\text{CH}_2\text{Cl}_2$ . The filtrate was concentrated and the residue was purified by column chromatography on silica gel (Petroleum ether/ $\text{CH}_2\text{Cl}_2$  = 10/1, v/v) to provide the desired product. The KIE was determined to be  $k_{\text{H}}/k_{\text{D}} = 0.088/0.092 = 0.96$ .

**Table S6.** Kinetic isotope experiments of benzo[*b*]thiophene.

| Entry | Time (h) | Yield of <b>4l</b> <sup>a</sup> | Yield of <b>4l</b> <sup>b</sup> |
|-------|----------|---------------------------------|---------------------------------|
| 1     | 0.5      | 12                              | 9                               |
| 2     | 1        | 17                              | 17                              |
| 3     | 1.5      | 22                              | 21                              |
| 4     | 2        | 25                              | 23                              |

<sup>a</sup>**2a** (80.6 mg, 0.6 mmol) was used. <sup>b</sup>[D]-**2a** (81.1 mg, 0.6 mmol) was used.

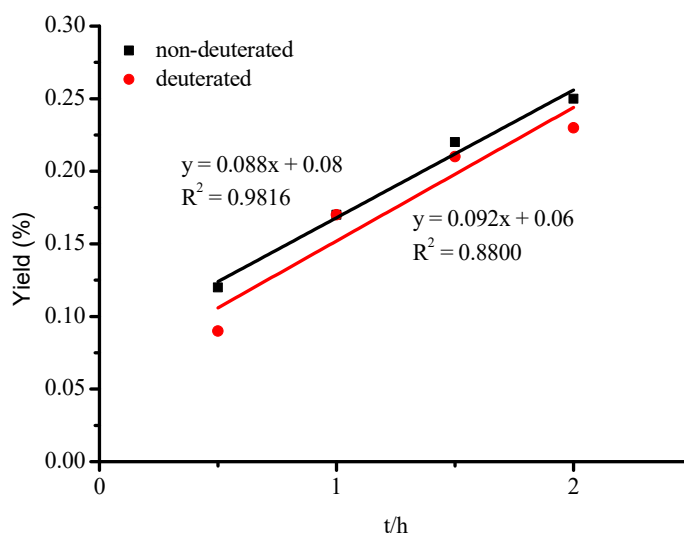

(2) Two separated oven-dried Schlenk tube with a magnetic stir bar was charged with  $\text{Cp}^*\text{Rh}(\text{MeCN})_3[\text{SbF}_6]_2$  (5.3 mg, 3 mol %),  $\text{Ag}_2\text{O}$  (162.2 mg, 0.7 mmol),  $\text{PivOH}$  (40.8 mg, 0.4 mmol), benzo[*b*]thiophene **2a** (80.6 mg, 0.6 mmol), [1,1'-biphenyl]-2-yl(methyl)sulfane **1m** or  $[\text{D}_5]\text{-1m}$  (0.2 mmol) and DCE (1.0 mL) under an  $\text{N}_2$  atmosphere. The resulting solution was stirred at 120 °C for specified time (0.5 h, 1.0 h, 1.5 h, 2.0 h). After being cooled to room temperature, the mixture was diluted with 3 mL of  $\text{CH}_2\text{Cl}_2$ . The mixture was filtered through a celite pad and washed with 10-20 mL of  $\text{CH}_2\text{Cl}_2$ . The filtrate was concentrated and the residue was purified by column chromatography on silica gel (Petroleum ether/ $\text{CH}_2\text{Cl}_2$  = 10/1, v/v) to provide the desired product. The KIE was determined to be  $k_{\text{H}}/k_{\text{D}} = 0.088/0.068 = 1.29$ .

**Table S7.** Kinetic isotope experiments of [1,1'-biphenyl]-2-yl(methyl)sulfane.

$\text{H}_5/\text{D}_5$  **1m** or  $[\text{D}_5]\text{-1m}$  + **2a**  $\xrightarrow[\text{K}_{\text{H}}/\text{K}_{\text{D}} = 1.29]{\text{Standard conditions, 0.5-2 h}}$   $\text{H}_4/\text{D}_4$  **4I** or  $[\text{D}_4]\text{-4I}$

| Entry | Time (h) | Yield of <b>4I</b> <sup>a</sup> | Yield of $[\text{D}_4]\text{-4I}$ <sup>b</sup> |
|-------|----------|---------------------------------|------------------------------------------------|
| 1     | 0.5      | 12                              | 7                                              |
| 2     | 1        | 17                              | 11                                             |
| 3     | 1.5      | 22                              | 15                                             |
| 4     | 2        | 25                              | 17                                             |

<sup>a</sup>**1m** (40.1 mg, 0.2 mmol) was used. <sup>b</sup> $[\text{D}_5]\text{-1m}$  (41.1 mg, 0.2 mmol) was used.

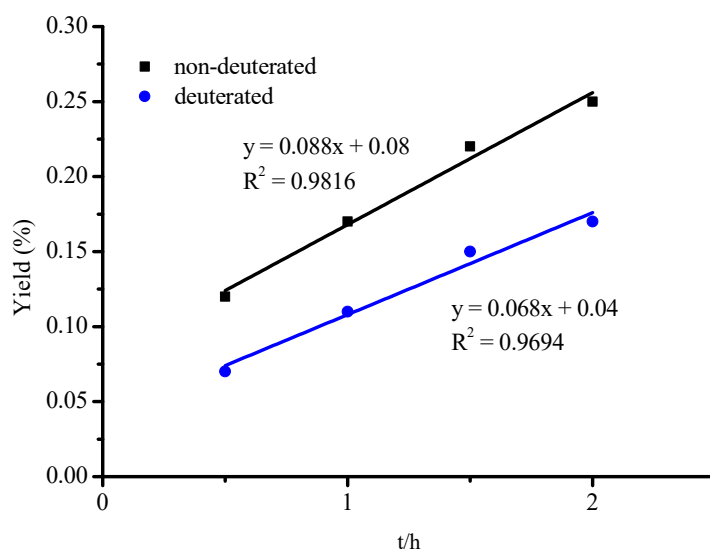

## VIII. Synthetic applications

(i) The thioether- and selenoether-substituted biheteroaryl compounds (1.0 mmol, 1.0 equiv) and *m*-CPBA (85%, 1.1 mmol, 1.1 equiv, 223.3 mg) were dissolved in CH<sub>2</sub>Cl<sub>2</sub> (10 mL) at 0 °C. The mixture was stirred at room temperature overnight. Saturated aqueous NaHCO<sub>3</sub> solution was added, and the organic layer was separated. The aqueous layer was extracted with CH<sub>2</sub>Cl<sub>2</sub>. Combined organic extract was dried over Na<sub>2</sub>SO<sub>4</sub>. After evaporation of the solvents, the mixture was placed in a dried Schlenk tube and DCE (15.0 mL) was added. With continuous N<sub>2</sub> streaming into the tube, TfOH (7.5 mL) was added dropwise. After stirring 24 h at room temperature, distilled water (27 mL) and pyridine (7 mL) were charged, and the resulting mixture was stirred overnight at 120 °C. The mixture was poured into 25 mL of 4 M aqueous HCl and diluted with distilled water and CH<sub>2</sub>Cl<sub>2</sub>. The organic layer was separated, and the aqueous layer was extracted with CH<sub>2</sub>Cl<sub>2</sub>. The combined organic extracts were washed with distilled water and brine, dried over Na<sub>2</sub>SO<sub>4</sub>, and concentrated in vacuo. The residue was purified by column chromatography on silica gel (Petroleum ether/CH<sub>2</sub>Cl<sub>2</sub>) to provide the desired product.

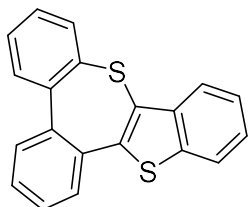

### Dibenzo[*b,d*]benzo[4,5]thieno[2,3-*f*]thiepine (**7a**)

Purification by column chromatography on silica gel (Petroleum ether/CH<sub>2</sub>Cl<sub>2</sub> = 30/1, v/v) afforded the desired product **7a** as a yellow solid (218.1 mg, 69%). <sup>1</sup>H NMR (300 MHz, CDCl<sub>3</sub>): δ = 8.11 (d, *J* = 8.1 Hz, 1H), 7.82 (d, *J* = 7.8 Hz, 1H), 7.75-7.72 (m, 1H), 7.67-7.61 (m, 2H), 7.54-7.51 (m, 2H), 7.50-7.45 (m, 2H), 7.39-7.34 (m, 2H), 7.30 (dd, *J*<sub>1</sub> = 7.5 Hz, *J*<sub>2</sub> = 1.8 Hz, 1H) ppm; <sup>13</sup>C {<sup>1</sup>H} NMR (75 MHz, CDCl<sub>3</sub>): δ = 143.9, 142.6, 141.2, 139.7, 139.4, 139.2, 134.0, 132.5, 132.0, 131.4, 130.5, 128.9, 128.8, 128.4, 128.3, 128.1, 125.1, 124.9, 123.0, 122.6 ppm. HRMS (ESI<sup>+</sup>): calcd for C<sub>20</sub>H<sub>13</sub>S<sub>2</sub><sup>+</sup>: [M+H]<sup>+</sup>, 317.0454, found: 317.0459.

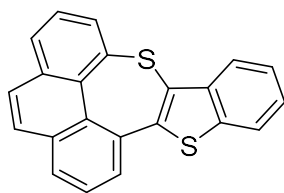

**Benzo[4,5]thieno[2,3-*f*]phenanthro[4,5-*bcd*]thiepine (7b)**

Purification by column chromatography on silica gel (Petroleum ether/CH<sub>2</sub>Cl<sub>2</sub> = 30/1, v/v) afforded the desired product **7b** as a yellow solid (115.9 mg, 34%). <sup>1</sup>H NMR (300 MHz, CDCl<sub>3</sub>): δ = 8.19 (d, *J* = 8.1 Hz, 1H), 8.00-7.97 (m, 2H), 7.92 (dd, *J*<sub>1</sub> = 7.2 Hz, *J*<sub>2</sub> = 0.9 Hz, 1H), 7.86-7.75 (m, 4H), 7.73-7.67 (m, 1H), 7.59-7.51 (m, 2H), 7.39 (t, *J* = 8.1 Hz, 1H) ppm; <sup>13</sup>C{<sup>1</sup>H} NMR (75 MHz, CDCl<sub>3</sub>): δ = 144.2, 140.9, 139.1, 134.7, 134.6, 133.8, 133.4, 132.6, 132.2, 130.4, 129.1, 128.9, 128.3, 128.0, 127.7, 126.6, 126.2, 125.0, 124.96, 123.1, 122.4 ppm. HRMS (ESI<sup>+</sup>): calcd for C<sub>22</sub>H<sub>13</sub>S<sub>2</sub><sup>+</sup>: [M+H]<sup>+</sup>, 341.0454, found: 341.0451.

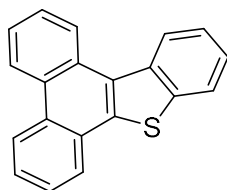

**Benzo[*b*]phenanthro[9,10-*d*]thiophene (8a)**

Purification by column chromatography on silica gel (Petroleum ether/CH<sub>2</sub>Cl<sub>2</sub> = 30/1, v/v) afforded the desired product **8a** as a yellow solid (76.7 mg, 27%). <sup>1</sup>H NMR (300 MHz, CDCl<sub>3</sub>): δ = 8.74 (d, *J* = 8.4 Hz, 1H), 8.55 (d, *J* = 8.1 Hz, 1H), 8.50 (d, *J* = 8.1 Hz, 1H), 8.44-8.41 (m, 1H), 7.93-7.90 (m, 1H), 7.79 (d, *J* = 7.8 Hz, 1H), 7.55-7.50 (m, 1H), 7.46-7.41 (m, 3H), 7.39-7.29 (m, 2H) ppm; <sup>13</sup>C{<sup>1</sup>H} NMR (75 MHz, CDCl<sub>3</sub>): δ = 139.3, 138.3, 137.6, 129.9, 129.6, 129.4, 127.9, 127.22, 127.19, 127.18, 125.5, 125.1, 125.0, 124.9, 124.7, 123.9, 123.8, 123.3, 123.2 ppm. HRMS (ESI<sup>+</sup>): calcd for C<sub>20</sub>H<sub>13</sub>S<sup>+</sup>: [M+H]<sup>+</sup>, 285.0733, found: 285.0730.

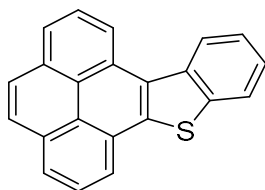

**Benzo[*b*]pyreno[4,5-*d*]thiophene (8b)**

Purification by column chromatography on silica gel (Petroleum ether/CH<sub>2</sub>Cl<sub>2</sub> = 30/1, v/v) afforded the desired product **8b** as a yellow solid (138.7 mg, 45%). <sup>1</sup>H NMR (300 MHz, CDCl<sub>3</sub>): δ = 8.10 (d, *J* = 8.1 Hz, 1H), 8.03 (dd, *J*<sub>1</sub> = 7.5 Hz, *J*<sub>2</sub> = 1.5 Hz, 1H), 7.99-7.94 (m, 2H), 7.87-7.65 (m, 5H), 7.51 (t, *J* = 7.5 Hz, 2H), 7.38 (t, *J* = 7.2 Hz, 1H) ppm; <sup>13</sup>C{<sup>1</sup>H} NMR (75 MHz, CDCl<sub>3</sub>): δ = 144.0, 141.1, 139.9, 134.6, 134.5, 134.1, 133.6, 133.4, 130.9, 129.5, 128.9, 128.8, 128.3, 128.1, 127.9, 127.6, 126.3, 124.9, 124.8, 123.9, 122.1, 121.0 ppm. HRMS (ESI<sup>+</sup>): calcd for C<sub>22</sub>H<sub>13</sub>S<sup>+</sup>: [M+H]<sup>+</sup>, 309.0733, found: 309.0721.

(ii) A 25 mL Schlenk tube with a magnetic stir bar was charged with dibenzo[*b,d*]benzo[4,5]thieno[2,3-*f*]thiepine (**7a**) (0.5 mmol, 158.2 mg), *m*-CPBA (85%) and CH<sub>2</sub>Cl<sub>2</sub> (5.0 mL). The resulting mixture was stirred at 0 °C and then at room temperature for 24 h. The filtrate was concentrated under vacuum and the residue was purified by column chromatography on silica gel (Petroleum ether/EtOAc) to provide the desired product.

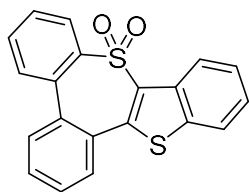

#### Dibenzo[*b,d*]benzo[4,5]thieno[2,3-*f*]thiepine 9,9-dioxide (**9**)

Compound **9** was synthesized by **7a** (0.5 mmol, 158.2 mg) and *m*-CPBA (85%, 1.1 mmol, 2.2 equiv, 223.3 mg). Purification by column chromatography on silica gel (Petroleum ether/EtOAc = 5/1, v/v) afforded the desired product **9** as a yellow solid (142.7 mg, 82%). <sup>1</sup>H NMR (300 MHz, CDCl<sub>3</sub>): δ = 8.67-8.64 (m, 1H), 8.15 (d, *J* = 5.1 Hz, 1H), 7.70-7.65 (m, 3H), 7.53-7.41 (m, 5H), 7.38-7.36 (m, 1H), 7.30-7.28 (m, 1H) ppm; <sup>13</sup>C{<sup>1</sup>H} NMR (75 MHz, CDCl<sub>3</sub>): δ = 147.9, 143.1, 138.6, 138.0, 136.4, 135.6, 134.5, 132.8, 132.5, 131.1, 131.0, 130.4, 129.8, 129.1, 128.5, 126.1, 126.0, 125.3, 124.3, 122.0 ppm. HRMS (ESI<sup>+</sup>): calcd for C<sub>22</sub>H<sub>13</sub>S<sub>2</sub>O<sub>2</sub><sup>+</sup>: [M+H]<sup>+</sup>, 349.0352, found: 349.0357.

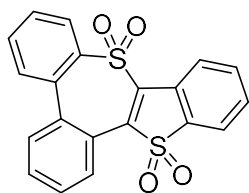

### Dibenzo[*b,d*]benzo[4,5]thieno[2,3-*f*]thiepine 9,9,14,14-tetraoxide (**10**)

Compound **10** was synthesized by **7a** (0.5 mmol, 158.2 mg) and *m*-CPBA (85%, 5.0 equiv, 2.5 mmol, 507.6 mg). Purification by column chromatography on silica gel (Petroleum ether/EtOAc = 2/1, v/v) afforded the desired product **10** as a yellow solid (171.2 mg, 90%). <sup>1</sup>H NMR (300 MHz, CDCl<sub>3</sub>): δ = 8.61-8.54 (m, 2H), 7.28 (d, *J* = 7.8 Hz, 1H), 7.90 (dd, *J*<sub>1</sub> = 7.5 Hz, *J*<sub>2</sub> = 1.8 Hz, 1H), 7.79-7.76 (m, 3H), 7.74-7.66 (m, 4H), 7.57 (t, *J* = 7.5 Hz, 1H) ppm; <sup>13</sup>C{<sup>1</sup>H} NMR (75 MHz, CDCl<sub>3</sub>): δ = 141.7, 141.3, 140.6, 138.6, 137.0, 136.2, 134.6, 134.2, 133.4, 131.7, 131.4, 131.1, 129.4, 129.2, 126.9, 126.8, 126.5, 125.6, 125.5, 122.5 ppm. HRMS (ESI<sup>+</sup>): calcd for C<sub>20</sub>H<sub>13</sub>S<sub>2</sub>O<sub>4</sub><sup>+</sup>: [M+H]<sup>+</sup>, 380.0177, found: 380.0170.

## IX. Photophysical properties

**Table S8.** Photophysical data of sulfur-embedded polycyclic aromatics in CH<sub>2</sub>Cl<sub>2</sub>.

| Compound                                      | <b>7a</b>        | <b>7b</b> | <b>8a</b> | <b>8b</b>        | <b>9</b> | <b>10</b> |
|-----------------------------------------------|------------------|-----------|-----------|------------------|----------|-----------|
| $\lambda_{\text{abs, max}}$ (nm) <sup>a</sup> | 306              | 304       | 318       | 354              | 304      | 354       |
| $\lambda_{\text{em, max}}$ (nm) <sup>b</sup>  | 360, 384,<br>500 | 392, 532  | 358, 386  | 388, 412,<br>432 | 380      | 434       |

<sup>a</sup>Absorption maxima in CH<sub>2</sub>Cl<sub>2</sub> at 1×10<sup>-5</sup> mol/L. <sup>b</sup>Emission maxima in CH<sub>2</sub>Cl<sub>2</sub> at 1×10<sup>-5</sup> mol/L.

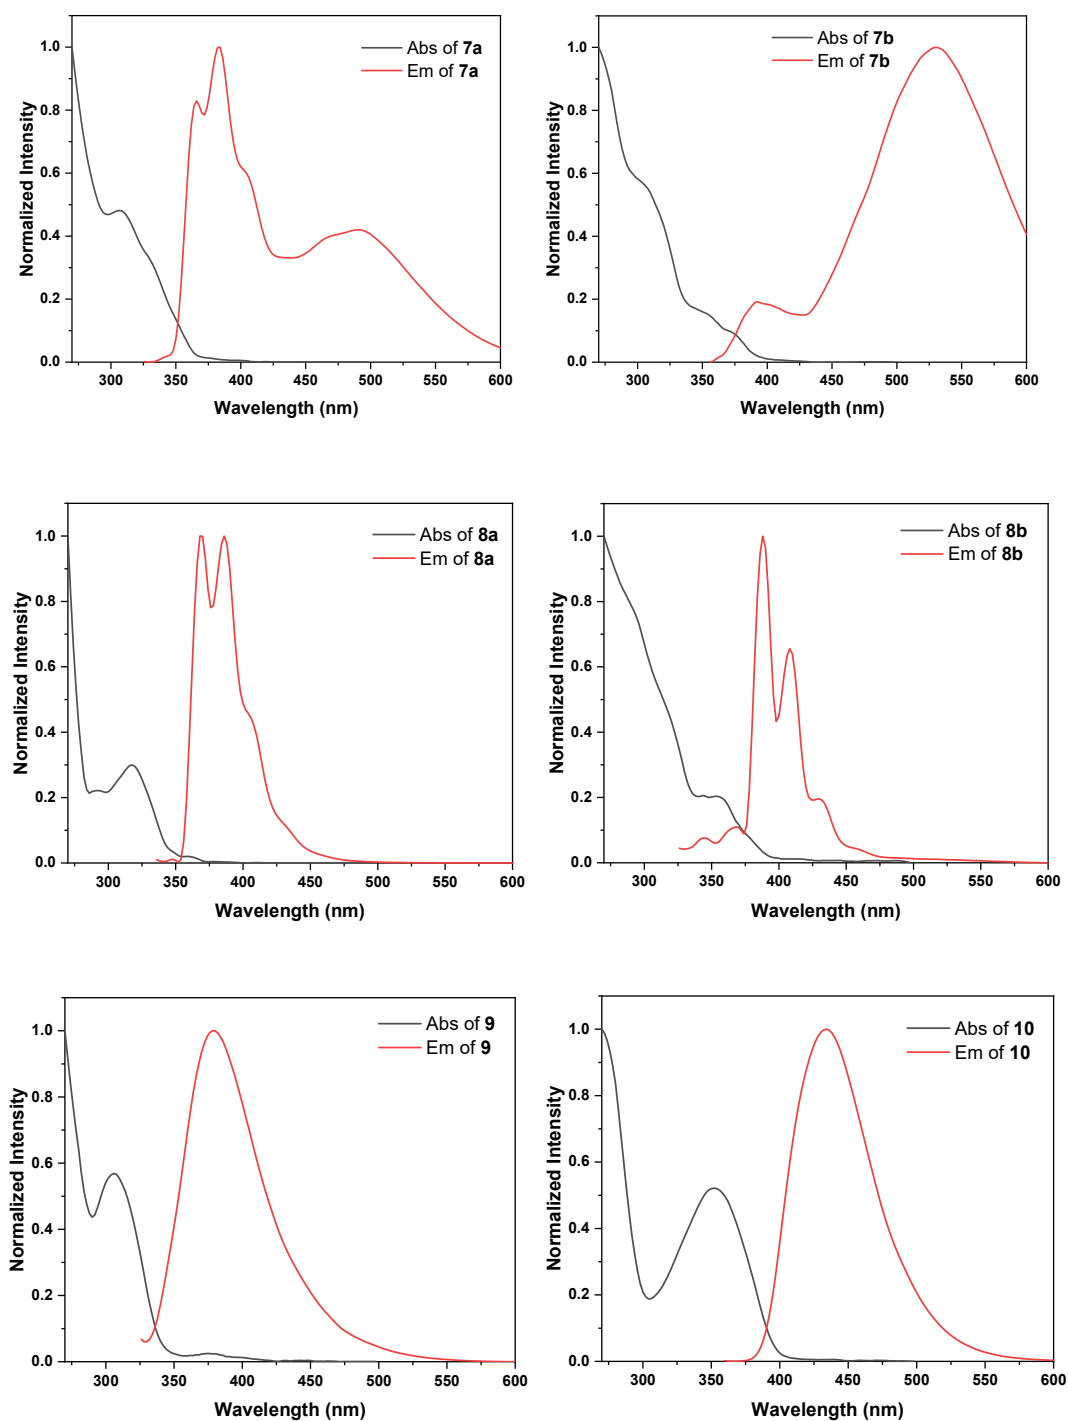

**Figure S1.** Absorption and fluorescence emission spectra of sulfur-embedded polycyclic aromatics. Absorption maxima in  $\text{CH}_2\text{Cl}_2$  at  $1 \times 10^{-5}$  mol/L. Emission maxima in  $\text{CH}_2\text{Cl}_2$  at  $1 \times 10^{-5}$  mol/L.

**Table S9. TD-DFT calculation results of 7a.**

| Excited State | Energy (eV) | Wavelength (nm) | Oscillator strength | Configurations                                                                                                           |
|---------------|-------------|-----------------|---------------------|--------------------------------------------------------------------------------------------------------------------------|
| 1             | 3.5975      | 344.64          | 0.0431              | H-2 -> L 0.16900<br>H -> L 0.66472<br>H -> L+1 0.12448                                                                   |
| 2             | 4.0092      | 309.25          | 0.0158              | H-2 -> L -0.17397<br>H -> L+1 0.66763                                                                                    |
| 3             | 4.2390      | 292.48          | 0.0606              | H-2 -> L 0.37028<br>H-1 -> L 0.54661<br>H -> L+3 -0.11917                                                                |
| 4             | 4.2939      | 288.74          | 0.2025              | H-3 -> L+1 -0.10034<br>H-2 -> L 0.51462<br>H-1 -> L -0.37729<br>H -> L -0.15466<br>H -> L+1 0.12347<br>H -> L+4 -0.10013 |
| 5             | 4.3783      | 283.18          | 0.0026              | H-3 -> L -0.12854<br>H -> L+2 0.66846                                                                                    |

**Table S10. TD-DFT calculation results of 7b.**

| Excited State | Energy (eV) | Wavelength (nm) | Oscillator strength | Configurations                                                                                                                                 |
|---------------|-------------|-----------------|---------------------|------------------------------------------------------------------------------------------------------------------------------------------------|
| 1             | 3.3221      | 373.21          | 0.0314              | H-1 -> L -0.19272<br>H -> L 0.63514<br>H -> L+1 -0.19162                                                                                       |
| 2             | 3.5066      | 353.58          | 0.0036              | H-1 -> L -0.21761<br>H -> L 0.12888<br>H -> L+1 0.64357                                                                                        |
| 3             | 3.7395      | 331.55          | 0.0734              | H-4 -> L+1 -0.13388<br>H-2 -> L 0.16594<br>H-2 -> L+1 0.12985<br>H-1 -> L 0.50137<br>H-1 -> L+1 -0.28354<br>H -> L 0.24434<br>H -> L+1 0.17075 |



|   |        |        |        |                                                                                   |
|---|--------|--------|--------|-----------------------------------------------------------------------------------|
| 4 | 3.9262 | 315.78 | 0.0336 | H-4 -> L -0.13774<br>H-2 -> L 0.43795<br>H-1 -> L -0.32769<br>H-1 -> L+1 -0.39434 |
| 5 | 4.0994 | 302.44 | 0.1655 | H-4 -> L 0.17726<br>H-2 -> L 0.47255<br>H-1 -> L+1 0.40761<br>H -> L+2 -0.20697   |

**Table S11. TD-DFT calculation results of 8a.**

| Excited State | Energy (eV) | Wavelength (nm) | Oscillator strength | Configurations                                                                                                             |
|---------------|-------------|-----------------|---------------------|----------------------------------------------------------------------------------------------------------------------------|
| 1             | 3.7257      | 332.78          | 0.0214              | H-2 -> L -0.10972<br>H-1 -> L -0.29397<br>H-1 -> L+1 -0.14856<br>H -> L -0.36539<br>H -> L+1 0.48145                       |
| 2             | 3.8201      | 324.56          | 0.0593              | H-1 -> L -0.11069<br>H-1 -> L+1 0.14869<br>H -> L 0.54223<br>H -> L+1 0.38234                                              |
| 3             | 4.0975      | 302.59          | 0.1669              | H-2 -> L -0.15131<br>H-1 -> L 0.56158<br>H-1 -> L+1 -0.11090<br>H -> L+1 0.25224<br>H -> L+2 -0.24006                      |
| 4             | 4.2479      | 291.87          | 0.0698              | H-2 -> L 0.32797<br>H-2 -> L+1 -0.17639<br>H-1 -> L 0.10287<br>H-1 -> L+1 0.52550<br>H -> L -0.15065<br>H -> L+1 0.15879   |
| 5             | 4.5305      | 273.66          | 0.0431              | H-2 -> L 0.55754<br>H-2 -> L+1 0.10974<br>H-1 -> L+1 -0.30982<br>H -> L+1 0.12120<br>H -> L+2 -0.12029<br>H -> L+3 0.16980 |

**Table S12. TD-DFT calculation results of 8b.**

| Excited State | Energy (eV) | Wavelength (nm) | Oscillator strength | Configurations                                                                                      |
|---------------|-------------|-----------------|---------------------|-----------------------------------------------------------------------------------------------------|
| 1             | 3.4407      | 360.35          | 0.1666              | H-1 -> L -0.21465<br>H-1 -> L+1 0.11666<br>H-> L 0.63464<br>H -> L+1 0.12133                        |
| 2             | 3.5781      | 346.51          | 0.0849              | H-2 -> L -0.15942<br>H-2 -> L -0.15942<br>H -> L 0.22709<br>H -> L+1 -0.30412                       |
| 3             | 3.8407      | 322.81          | 0.0892              | H-3 -> L -0.10239<br>H-2 -> L 0.40090<br>H-1 -> L 0.34605<br>H -> L+1 0.43584                       |
| 4             | 4.1271      | 300.41          | 0.0140              | H-3 -> L -0.43822<br>H-2 -> L -0.24722<br>H -> L+2 0.47969                                          |
| 5             | 4.1826      | 296.43          | 0.1678              | H-3 -> L 0.15492<br>H-2 -> L 0.40134<br>H-1 -> L+1 0.16593<br>H -> L+1 -0.34317<br>H -> L+2 0.35960 |

**Table S13. TD-DFT calculation results of 9.**

| Excited State | Energy (eV) | Wavelength (nm) | Oscillator strength | Configurations                                                                |
|---------------|-------------|-----------------|---------------------|-------------------------------------------------------------------------------|
| 1             | 3.9489      | 313.97          | 0.0902              | H-1 -> L 0.15291<br>H-1 -> L+1 -0.13695<br>H -> L 0.63879<br>H -> L+1 0.16762 |
| 2             | 4.0594      | 305.42          | 0.0808              | H-2 -> L 0.17487<br>H-1 -> L 0.40733<br>H -> L -0.22563<br>H -> L+1 0.48654   |
| 3             | 4.1642      | 297.74          | 0.1650              | H-2 -> L -0.20902<br>H-1 -> L 0.52227                                         |

|   |        |        |        |                                                                                    |
|---|--------|--------|--------|------------------------------------------------------------------------------------|
|   |        |        |        | H -> L+1 -0.38177                                                                  |
| 4 | 4.3499 | 285.03 | 0.0417 | H-2 -> L -0.35527<br>H-1 -> L+1 0.54257<br>H -> L+1 0.23237                        |
| 5 | 4.5551 | 272.19 | 0.0928 | H-2 -> L 0.48458<br>H-2 -> L+1 -0.17875<br>H-1 -> L+1 0.40882<br>H -> L+1 -0.15806 |

**Table S14. TD-DFT calculation results of 10.**

| Excited State | Energy (eV) | Wavelength (nm) | Oscillator strength | Configurations                                                                                                           |
|---------------|-------------|-----------------|---------------------|--------------------------------------------------------------------------------------------------------------------------|
| 1             | 3.5002      | 354.22          | 0.1658              | H -> L 0.69380                                                                                                           |
| 2             | 3.7077      | 334.40          | 0.0124              | H-1 -> L 0.68975<br>H -> L+1 0.11849                                                                                     |
| 3             | 4.1441      | 299.18          | 0.0243              | H-6 -> L 0.11199<br>H-4 -> L -0.12875<br>H-3 -> L 0.12691<br>H-2 -> L 0.63708<br>H -> L+2 0.13816                        |
| 4             | 4.2864      | 289.25          | 0.0038              | H-6 -> L 0.25755<br>H-5 -> L -0.14877<br>H-4 -> L -0.39471<br>H-3 -> L 0.42249<br>H-2 -> L -0.18956<br>H-2 -> L -0.18956 |
| 5             | 4.3803      | 283.05          | 0.0042              | H-4 -> L -0.39592<br>H-3 -> L -0.38922<br>H -> L+1 0.40347                                                               |

## X. Single crystal X-ray structure and crystallographic data

The single crystals of compounds **4l** (2281727), **7a** (2433068), **7b** (2475673), **8a** (2433061), **8b** (2433067), **9** (2433062) and **10** (2433063) were obtained from solvent diffusion method with CH<sub>2</sub>Cl<sub>2</sub> and hexane.

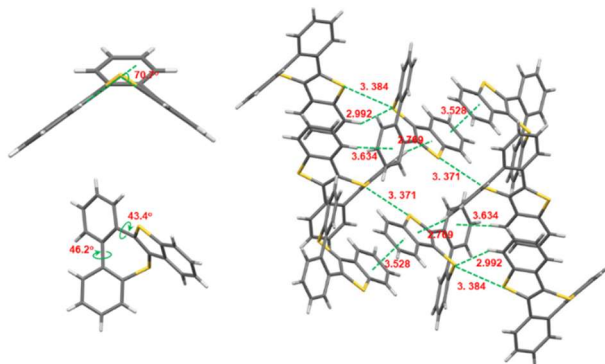

**Figure S2.** Crystal X-ray structure and packing pattern of **7a**.

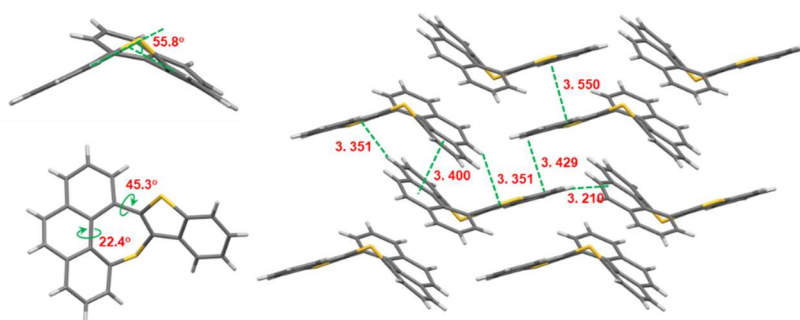

**Figure S3.** Crystal X-ray structure and packing pattern of **7b**.

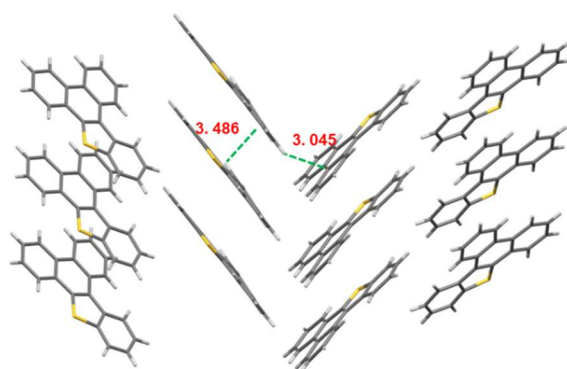

**Figure S4.** Crystal X-ray structure and packing pattern of **8a**.

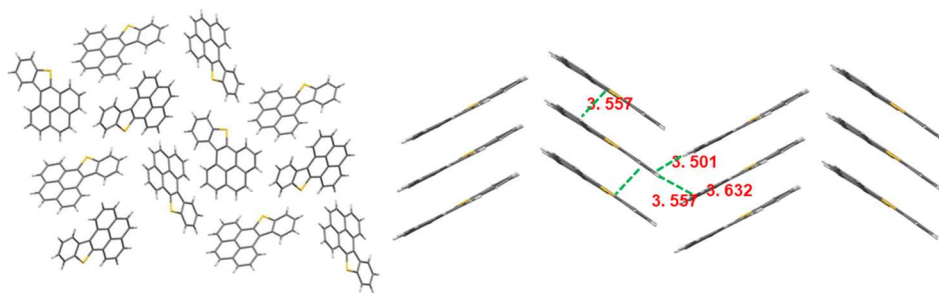

**Figure S5.** Crystal X-ray structure and packing pattern of **8b**.

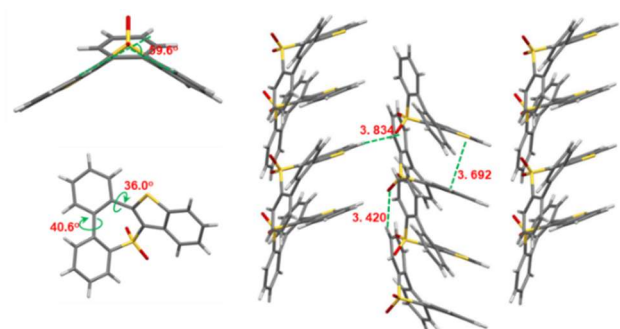

**Figure S6.** Crystal X-ray structure and packing pattern of **9**.

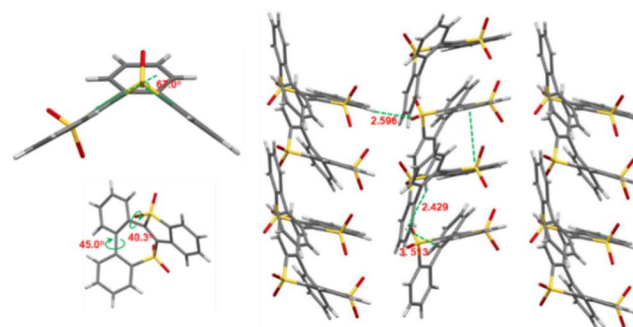

**Figure S7.** Crystal X-ray structure and packing pattern of **10**.

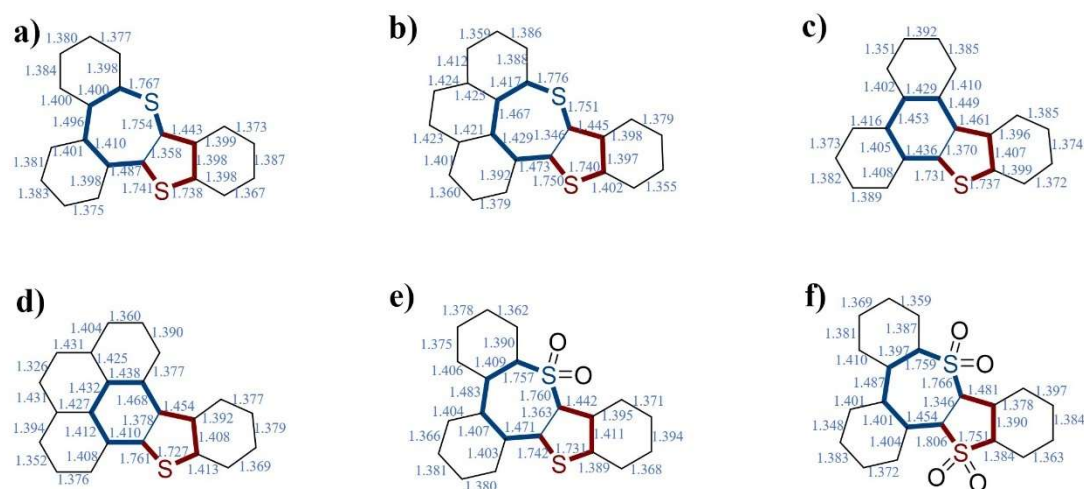

**Figure S8.** Bond length in angstroms(blue) determined by X-ray crystallography of a) **7a**, b) **7b**, c) **8a**, d) **8b**, e) **9**, and f) **10**.

**Table S15.** Crystal data and structure refinement for **4l**.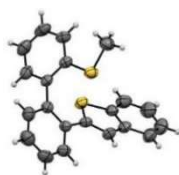

|                                             |                                                               |
|---------------------------------------------|---------------------------------------------------------------|
| Identification code                         | <b>4l</b>                                                     |
| Empirical formula                           | C <sub>21</sub> H <sub>16</sub> S <sub>2</sub>                |
| Formula weight                              | 332.46                                                        |
| Temperature/K                               | 293(2)                                                        |
| Crystal system                              | orthorhombic                                                  |
| Space group                                 | Pbca                                                          |
| a/Å                                         | 10.7590(2)                                                    |
| b/Å                                         | 15.6784(3)                                                    |
| c/Å                                         | 20.0594(4)                                                    |
| α/°                                         | 90                                                            |
| β/°                                         | 90                                                            |
| γ/°                                         | 90                                                            |
| Volume/Å <sup>3</sup>                       | 3383.70(11)                                                   |
| Z                                           | 8                                                             |
| ρ <sub>calc</sub> /cm <sup>3</sup>          | 1.305                                                         |
| μ/mm <sup>-1</sup>                          | 2.799                                                         |
| F(000)                                      | 1392.0                                                        |
| Crystal size/mm <sup>3</sup>                | 0.2 × 0.18 × 0.15                                             |
| Radiation                                   | Cu Kα (λ = 1.54184)                                           |
| 2θ range for data collection/°              | 8.816 to 136.316                                              |
| Index ranges                                | -12 ≤ h ≤ 10, -18 ≤ k ≤ 18, -24 ≤ l ≤ 24                      |
| Reflections collected                       | 11547                                                         |
| Independent reflections                     | 3071 [R <sub>int</sub> = 0.0523, R <sub>sigma</sub> = 0.0356] |
| Data/restraints/parameters                  | 3071/0/210                                                    |
| Goodness-of-fit on F <sup>2</sup>           | 1.100                                                         |
| Final R indexes [I ≥ 2σ (I)]                | R <sub>1</sub> = 0.0570, wR <sub>2</sub> = 0.1651             |
| Final R indexes [all data]                  | R <sub>1</sub> = 0.0626, wR <sub>2</sub> = 0.1711             |
| Largest diff. peak/hole / e Å <sup>-3</sup> | 0.46/-0.39                                                    |

**Table S16.** Crystal data and structure refinement for **7a**.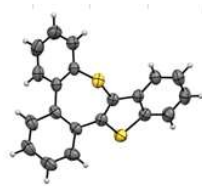

|                                             |                                                          |
|---------------------------------------------|----------------------------------------------------------|
| Identification code                         | <b>7a</b>                                                |
| Empirical formula                           | C <sub>20</sub> H <sub>12</sub> S <sub>2</sub>           |
| Formula weight                              | 316.42                                                   |
| Temperature/K                               | 293(2)                                                   |
| Crystal system                              | triclinic                                                |
| Space group                                 | P-1                                                      |
| a/Å                                         | 9.7309(3)                                                |
| b/Å                                         | 11.2753(6)                                               |
| c/Å                                         | 14.8333(3)                                               |
| α/°                                         | 106.545(4)                                               |
| β/°                                         | 90.845(2)                                                |
| γ/°                                         | 103.498(4)                                               |
| Volume/Å <sup>3</sup>                       | 1511.24(11)                                              |
| Z                                           | 4                                                        |
| ρ <sub>calc</sub> /cm <sup>3</sup>          | 1.391                                                    |
| μ/mm <sup>-1</sup>                          | 3.109                                                    |
| F(000)                                      | 656.0                                                    |
| Crystal size/mm <sup>3</sup>                | 0.3 × 0.25 × 0.06                                        |
| Radiation                                   | Cu Kα (λ = 1.54184)                                      |
| 2θ range for data collection/°              | 8.444 to 136.466                                         |
| Index ranges                                | -11 ≤ h ≤ 11, -13 ≤ k ≤ 13, -17 ≤ l ≤ 17                 |
| Reflections collected                       | 9924                                                     |
| Independent reflections                     | 9924 [R <sub>int</sub> = ?, R <sub>sigma</sub> = 0.0201] |
| Data/restraints/parameters                  | 9924/0/398                                               |
| Goodness-of-fit on F <sup>2</sup>           | 1.270                                                    |
| Final R indexes [I ≥ 2σ (I)]                | R <sub>1</sub> = 0.0993, wR <sub>2</sub> = 0.2737        |
| Final R indexes [all data]                  | R <sub>1</sub> = 0.1036, wR <sub>2</sub> = 0.2849        |
| Largest diff. peak/hole / e Å <sup>-3</sup> | 0.96/-0.64                                               |

**Table S17.** Crystal data and structure refinement for **7b**.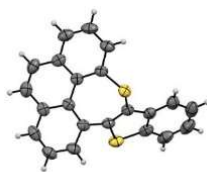

|                                             |                                                               |
|---------------------------------------------|---------------------------------------------------------------|
| Identification code                         | <b>7b</b>                                                     |
| Empirical formula                           | C <sub>22</sub> H <sub>12</sub> S <sub>2</sub>                |
| Formula weight                              | 340.44                                                        |
| Temperature/K                               | 297.00                                                        |
| Crystal system                              | triclinic                                                     |
| Space group                                 | P-1                                                           |
| a/Å                                         | 7.9692(3)                                                     |
| b/Å                                         | 9.1737(3)                                                     |
| c/Å                                         | 11.3045(4)                                                    |
| α/°                                         | 97.109(2)                                                     |
| β/°                                         | 101.458(2)                                                    |
| γ/°                                         | 95.919(2)                                                     |
| Volume/Å <sup>3</sup>                       | 796.78(5)                                                     |
| Z                                           | 1                                                             |
| ρ <sub>calc</sub> /cm <sup>3</sup>          | 1.419                                                         |
| μ/mm <sup>-1</sup>                          | 2.993                                                         |
| F(000)                                      | 352.0                                                         |
| Crystal size/mm <sup>3</sup>                | 0.2 × 0.18 × 0.15                                             |
| Radiation                                   | CuKα (λ = 1.54184)                                            |
| 2θ range for data collection/°              | 8.068 to 133.342                                              |
| Index ranges                                | -9 ≤ h ≤ 9, -10 ≤ k ≤ 10, -13 ≤ l ≤ 13                        |
| Reflections collected                       | 8332                                                          |
| Independent reflections                     | 2787 [R <sub>int</sub> = 0.0594, R <sub>sigma</sub> = 0.0602] |
| Data/restraints/parameters                  | 2787/0/217                                                    |
| Goodness-of-fit on F <sup>2</sup>           | 1.033                                                         |
| Final R indexes [I ≥ 2σ (I)]                | R <sub>1</sub> = 0.0505, wR <sub>2</sub> = 0.1403             |
| Final R indexes [all data]                  | R <sub>1</sub> = 0.0621, wR <sub>2</sub> = 0.1465             |
| Largest diff. peak/hole / e Å <sup>-3</sup> | 0.39/-0.48                                                    |



**Table S18.** Crystal data and structure refinement for **8a**.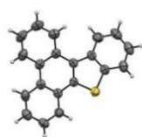

|                                             |                                                               |
|---------------------------------------------|---------------------------------------------------------------|
| Identification code                         | <b>8a</b>                                                     |
| Empirical formula                           | C <sub>20</sub> H <sub>12</sub> S                             |
| Formula weight                              | 284.36                                                        |
| Temperature/K                               | 293                                                           |
| Crystal system                              | orthorhombic                                                  |
| Space group                                 | P212121                                                       |
| a/Å                                         | 5.2323(2)                                                     |
| b/Å                                         | 8.9668(4)                                                     |
| c/Å                                         | 29.1269(10)                                                   |
| α/°                                         | 90                                                            |
| β/°                                         | 90                                                            |
| γ/°                                         | 90                                                            |
| Volume/Å <sup>3</sup>                       | 1366.55(9)                                                    |
| Z                                           | 4                                                             |
| ρ <sub>calc</sub> /cm <sup>3</sup>          | 1.382                                                         |
| μ/mm <sup>-1</sup>                          | 1.983                                                         |
| F(000)                                      | 592.0                                                         |
| Crystal size/mm <sup>3</sup>                | 0.15 × 0.1 × 0.08                                             |
| Radiation                                   | Cu Kα (λ = 1.54184)                                           |
| 2θ range for data collection/°              | 10.322 to 135.898                                             |
| Index ranges                                | -6 ≤ h ≤ 4, -10 ≤ k ≤ 10, -35 ≤ l ≤ 35                        |
| Reflections collected                       | 4479                                                          |
| Independent reflections                     | 2178 [R <sub>int</sub> = 0.0411, R <sub>sigma</sub> = 0.0517] |
| Data/restraints/parameters                  | 2178/0/190                                                    |
| Goodness-of-fit on F <sup>2</sup>           | 1.033                                                         |
| Final R indexes [I ≥ 2σ (I)]                | R <sub>1</sub> = 0.0487, wR <sub>2</sub> = 0.1300             |
| Final R indexes [all data]                  | R <sub>1</sub> = 0.0520, wR <sub>2</sub> = 0.1341             |
| Largest diff. peak/hole / e Å <sup>-3</sup> | 0.33/-0.29                                                    |
| Flack parameter                             | -0.017(18)                                                    |

**Table S19.** Crystal data and structure refinement for **8b**.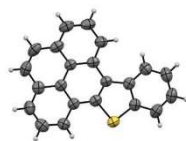

|                                             |                                                               |
|---------------------------------------------|---------------------------------------------------------------|
| Identification code                         | <b>8b</b>                                                     |
| Empirical formula                           | C <sub>22</sub> H <sub>12</sub> S                             |
| Formula weight                              | 308.38                                                        |
| Temperature/K                               | 293(2)                                                        |
| Crystal system                              | orthorhombic                                                  |
| Space group                                 | P212121                                                       |
| a/Å                                         | 4.7483(2)                                                     |
| b/Å                                         | 15.0591(5)                                                    |
| c/Å                                         | 20.1810(7)                                                    |
| α/°                                         | 90                                                            |
| β/°                                         | 90                                                            |
| γ/°                                         | 90                                                            |
| Volume/Å <sup>3</sup>                       | 1443.04(9)                                                    |
| Z                                           | 4                                                             |
| ρ <sub>calc</sub> /cm <sup>3</sup>          | 1.419                                                         |
| μ/mm <sup>-1</sup>                          | 1.928                                                         |
| F(000)                                      | 640.0                                                         |
| Crystal size/mm <sup>3</sup>                | 0.2 × 0.15 × 0.12                                             |
| Radiation                                   | CuKα (λ = 1.54178)                                            |
| 2θ range for data collection/°              | 7.324 to 133.334                                              |
| Index ranges                                | -4 ≤ h ≤ 5, -17 ≤ k ≤ 16, -23 ≤ l ≤ 24                        |
| Reflections collected                       | 9014                                                          |
| Independent reflections                     | 2454 [R <sub>int</sub> = 0.0601, R <sub>sigma</sub> = 0.0485] |
| Data/restraints/parameters                  | 2454/0/208                                                    |
| Goodness-of-fit on F <sup>2</sup>           | 1.019                                                         |
| Final R indexes [I >= 2σ (I)]               | R <sub>1</sub> = 0.0441, wR <sub>2</sub> = 0.1128             |
| Final R indexes [all data]                  | R <sub>1</sub> = 0.0525, wR <sub>2</sub> = 0.1173             |
| Largest diff. peak/hole / e Å <sup>-3</sup> | 0.48/-0.20                                                    |
| Flack parameter                             | 0.018(16)                                                     |

**Table S20.** Crystal data and structure refinement for **9**.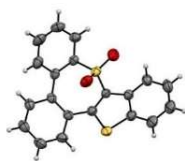

|                                             |                                                               |
|---------------------------------------------|---------------------------------------------------------------|
| Identification code                         | <b>9</b>                                                      |
| Empirical formula                           | C <sub>20</sub> H <sub>12</sub> O <sub>2</sub> S <sub>2</sub> |
| Formula weight                              | 348.42                                                        |
| Temperature/K                               | 273.15                                                        |
| Crystal system                              | orthorhombic                                                  |
| Space group                                 | Pbca                                                          |
| a/Å                                         | 7.8957(4)                                                     |
| b/Å                                         | 16.3997(7)                                                    |
| c/Å                                         | 24.1206(10)                                                   |
| α/°                                         | 90                                                            |
| β/°                                         | 90                                                            |
| γ/°                                         | 90                                                            |
| Volume/Å <sup>3</sup>                       | 3123.3(2)                                                     |
| Z                                           | 8                                                             |
| ρ <sub>calc</sub> /cm <sup>3</sup>          | 1.482                                                         |
| μ/mm <sup>-1</sup>                          | 3.164                                                         |
| F(000)                                      | 1440.0                                                        |
| Crystal size/mm <sup>3</sup>                | 0.2 × 0.15 × 0.12                                             |
| Radiation                                   | CuKα (λ = 1.54178)                                            |
| 2θ range for data collection/°              | 7.33 to 133.174                                               |
| Index ranges                                | -9 ≤ h ≤ 9, -19 ≤ k ≤ 18, -28 ≤ l ≤ 27                        |
| Reflections collected                       | 19098                                                         |
| Independent reflections                     | 2746 [R <sub>int</sub> = 0.0582, R <sub>sigma</sub> = 0.0405] |
| Data/restraints/parameters                  | 2746/0/217                                                    |
| Goodness-of-fit on F <sup>2</sup>           | 1.081                                                         |
| Final R indexes [I ≥ 2σ (I)]                | R <sub>1</sub> = 0.0503, wR <sub>2</sub> = 0.1414             |
| Final R indexes [all data]                  | R <sub>1</sub> = 0.0567, wR <sub>2</sub> = 0.1449             |
| Largest diff. peak/hole / e Å <sup>-3</sup> | 0.40/-0.45                                                    |

**Table S21.** Crystal data and structure refinement for **10**.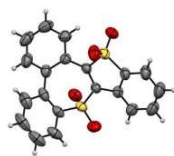

|                                             |                                                               |
|---------------------------------------------|---------------------------------------------------------------|
| Identification code                         | <b>10</b>                                                     |
| Empirical formula                           | C <sub>20</sub> H <sub>12</sub> O <sub>4</sub> S <sub>2</sub> |
| Formula weight                              | 380.42                                                        |
| Temperature/K                               | 293                                                           |
| Crystal system                              | orthorhombic                                                  |
| Space group                                 | Pbca                                                          |
| a/Å                                         | 8.02320(10)                                                   |
| b/Å                                         | 16.8258(3)                                                    |
| c/Å                                         | 25.0537(4)                                                    |
| α/°                                         | 90                                                            |
| β/°                                         | 90                                                            |
| γ/°                                         | 90                                                            |
| Volume/Å <sup>3</sup>                       | 3382.17(9)                                                    |
| Z                                           | 8                                                             |
| ρ <sub>calc</sub> /cm <sup>3</sup>          | 1.494                                                         |
| μ/mm <sup>-1</sup>                          | 3.066                                                         |
| F(000)                                      | 1568.0                                                        |
| Crystal size/mm <sup>3</sup>                | 0.15 × 0.1 × 0.05                                             |
| Radiation                                   | Cu Kα (λ = 1.54184)                                           |
| 2θ range for data collection/°              | 7.056 to 136.646                                              |
| Index ranges                                | -6 ≤ h ≤ 9, -20 ≤ k ≤ 17, -30 ≤ l ≤ 29                        |
| Reflections collected                       | 12149                                                         |
| Independent reflections                     | 3077 [R <sub>int</sub> = 0.0439, R <sub>sigma</sub> = 0.0401] |
| Data/restraints/parameters                  | 3077/0/235                                                    |
| Goodness-of-fit on F <sup>2</sup>           | 1.101                                                         |
| Final R indexes [I ≥ 2σ (I)]                | R <sub>1</sub> = 0.0655, wR <sub>2</sub> = 0.1826             |
| Final R indexes [all data]                  | R <sub>1</sub> = 0.0703, wR <sub>2</sub> = 0.1864             |
| Largest diff. peak/hole / e Å <sup>-3</sup> | 0.96/-0.41                                                    |

## XI. Theoretical calculations

Theoretical calculations were carried out using Gaussian 09 software.<sup>[8]</sup> The ground-state structures were optimized by density functional theory (DFT) at B3LYP/6-31G\* level.<sup>[9,10]</sup> The electrostatic potentials and FMO distributions were visualized using Gaussview 5.0 software.

(i) Calculated FMO distributions and orbital energy levels

**Table S22.** FMO distributions of sulfur-embedded polycyclic aromatics.

| Compounds | HOMO                                                                                | LUMO                                                                                  |
|-----------|-------------------------------------------------------------------------------------|---------------------------------------------------------------------------------------|
| 7a        | 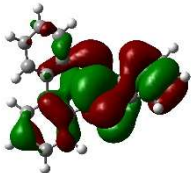  |   |
| 7b        |  |  |
| 8a        |  |  |
| 8b        |  |  |

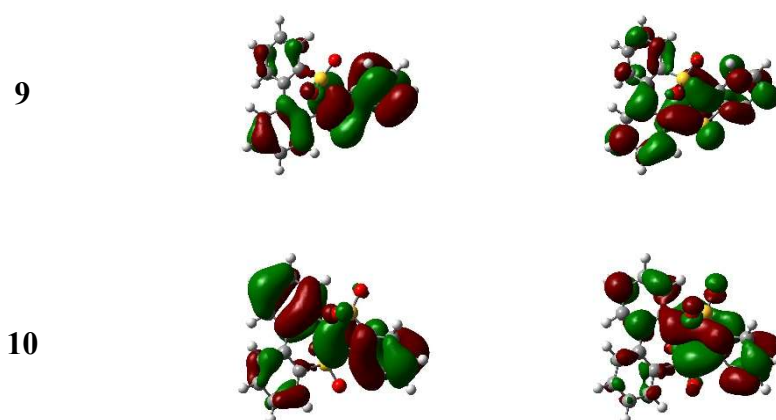

**Table S23.** Calculated orbital energy levels of sulfur-embedded polycyclic aromatics

| Compounds | HOMO (eV) | LUMO (eV) | E <sub>g</sub> (eV) |
|-----------|-----------|-----------|---------------------|
| <b>7a</b> | -5.63     | -1.33     | 4.30                |
| <b>7b</b> | -5.55     | -1.56     | 3.99                |
| <b>8a</b> | -5.54     | -1.35     | 4.19                |
| <b>8b</b> | -5.33     | -1.66     | 3.67                |
| <b>9</b>  | -6.15     | -1.71     | 4.44                |
| <b>10</b> | -6.64     | -2.62     | 4.02                |

(ii) The electrostatic potential maps

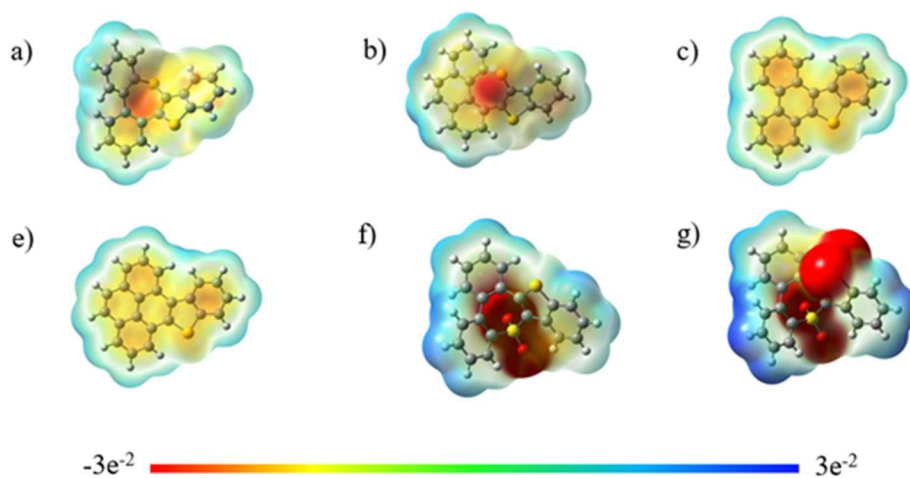

**Figure S9.** Electrostatic potential maps of (a) **7a**, (b) **7b**, (c) **8a**, (d) **8b**, (e) **9**, (f) **10**.

(iii) Hirshfeld surfaces analysis

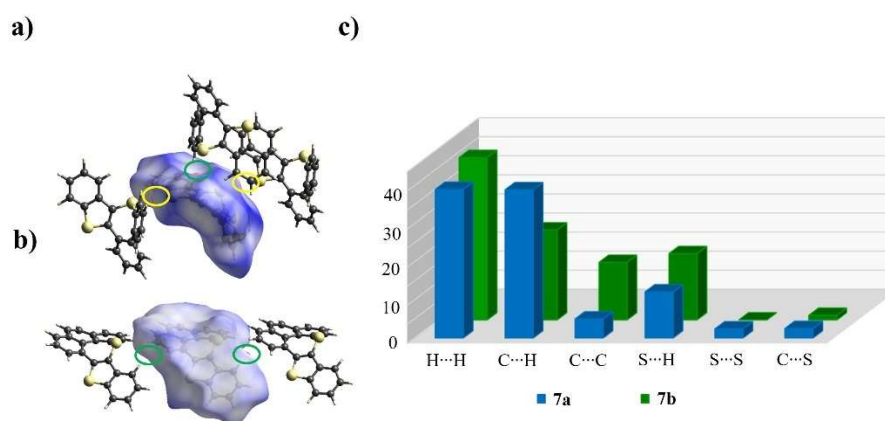

**Figure S10.** Hirshfeld  $d_{\text{norm}}$  surfaces of the crystals consisting of (a) **7a**, (b) **7b**; (c) Relative contributions to the Hirshfeld  $d_{\text{norm}}$  surfaces for the various intermolecular contacts of **7a** and **7b**. The green and yellow circles correspond to the C-H... $\pi$  interactions and S...S interactions, respectively.

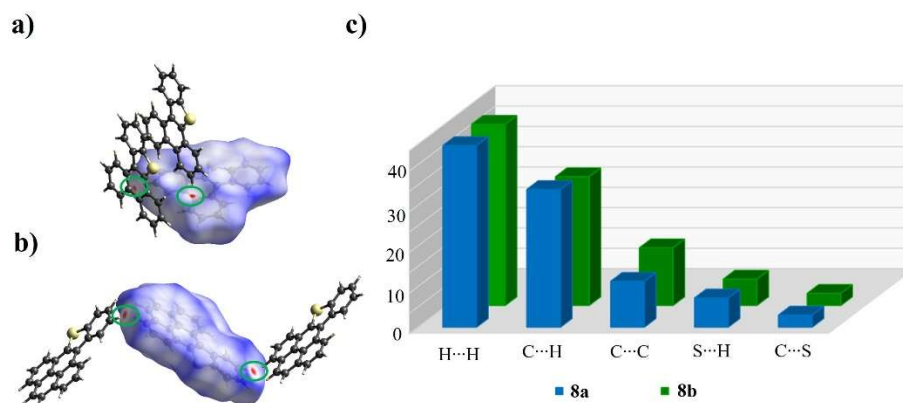

**Figure S11.** Hirshfeld  $d_{\text{norm}}$  surfaces of the crystals consisting of (a) **8a**, (b) **8b**; (c) Relative contributions to the Hirshfeld  $d_{\text{norm}}$  surfaces for the various intermolecular contacts of **8a** and **8b**. The green circles correspond to the C–H $\cdots$  $\pi$  interactions.

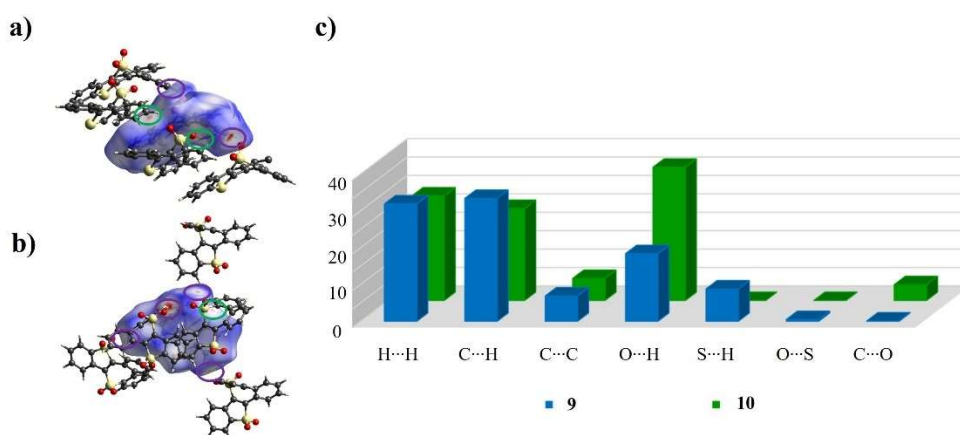

**Figure S12.** Hirshfeld  $d_{\text{norm}}$  surfaces of the crystals consisting of (a) **9**, (b) **10**; (c) Relative contributions to the Hirshfeld  $d_{\text{norm}}$  surfaces for the various intermolecular contacts of **9** and **10**. The green and red circles correspond to the C–H $\cdots$  $\pi$  and hydrogen bond interactions, respectively.



## XII. References

- [1]. Y. Li, B.-J. Li, W.-H. Wang, W.-P. Huang, X.-S. Zhang, K. Chen, Z.-J. Shi, *Angew. Chem. Int. Ed.*, **2011**, 50, 2115–2119.
- [2]. G. Liao, T. Zhang, L. Jin, B.-J. Wang, C.-K. Xu, Y. Lan, Y. Zhao, B. Shi, *Angew. Chem. Int. Ed.*, **2022**, 61, e202115221.
- [3]. P. L. McGinley, J. T. Koh, *J. Am. Chem. Soc.*, **2007**, 129, 3822–3823.
- [4]. N. X. Gu, P. H. Oyala, J. C. Peters, *J. Am. Chem. Soc.*, **2018**, 140, 6374–6382.
- [5]. C. Duan, J. Zhang, J. Xiang, X. Yang, X. Gao, *Angew. Chem. Int. Ed.*, **2022**, 61, e202201494.
- [6]. X.-S. Zhang, Y.-F. Zhang, K. Chen, Z.-J. Shi, *Org. Chem. Front.*, **2014**, 1, 1096–1100.
- [7]. Y. Ran, Y. Yang, H. You, J. You, *ACS Catal.*, **2018**, 8, 1796–1801.
- [8] M. J. Frisch, G. W. Trucks, H. B. Schlegel, G. E. Scuseria, M. A. Robb, J. R. Cheeseman, G. Scalmani, V. Barone, B. Mennucci, G. A. Petersson, H. Nakatsuji, M. Caricato, X. Li, H. P. Hratchian, A. F. Izmaylov, J. Bloino, G. Zheng, J. L. Sonnenberg, M. Hada, M. Ehara, K. Toyota, R. Fukuda, J. Hasegawa, M. Ishida, T. Nakajima, Y. Honda, O. Kitao, H. Nakai, T. Vreven, J. A. Jr. Montgomery, J. E. Peralta, F. Ogliaro, M. Bearpark, J. J. Heyd, E. Brothers, K. N. Kudin, V. N. Staroverov, R. Kobayashi, J. Normand, K. Raghavachari, A. Rendell, J. C. Burant, S. S. Iyengar, J. Tomasi, M. Cossi, N. Rega, N. J. Millam, M. Klene, J. E. Knox, J. B. Cross, V. Bakken, C. Adamo, J. Jaramillo, R. Gomperts, R. E. Stratmann, O. Yazyev, A. J. Austin, R. Cammi, C. Pomelli, J. W. Ochterski, R. L. Martin, K. Morokuma, V. G. Zakrzewski, G. A. Voth, P. Salvador, J. J. Dannenberg, S. Dapprich, A. D. Daniels, Ö. Farkas, J. B. Foresman, J. V. Ortiz, J. Cioslowski, D. J. Fox, Gaussian 09, Revision D.01, Gaussian, Inc., Wallingford CT, 2009.
- [9] A. D. Becke, *J. Chem. Phys.*, **1993**, 98, 5648–5652.
- [10] C. Lee, W. Yang, R. G. Parr, *Phys. Rev. B.*, **1988**, 37, 785–789.

### XIII. Copies of $^1\text{H}$ and $^{13}\text{C}\{^1\text{H}\}$ NMR spectra

$^1\text{H}$  NMR spectrum of **1r** in  $\text{CDCl}_3$  (300 MHz)

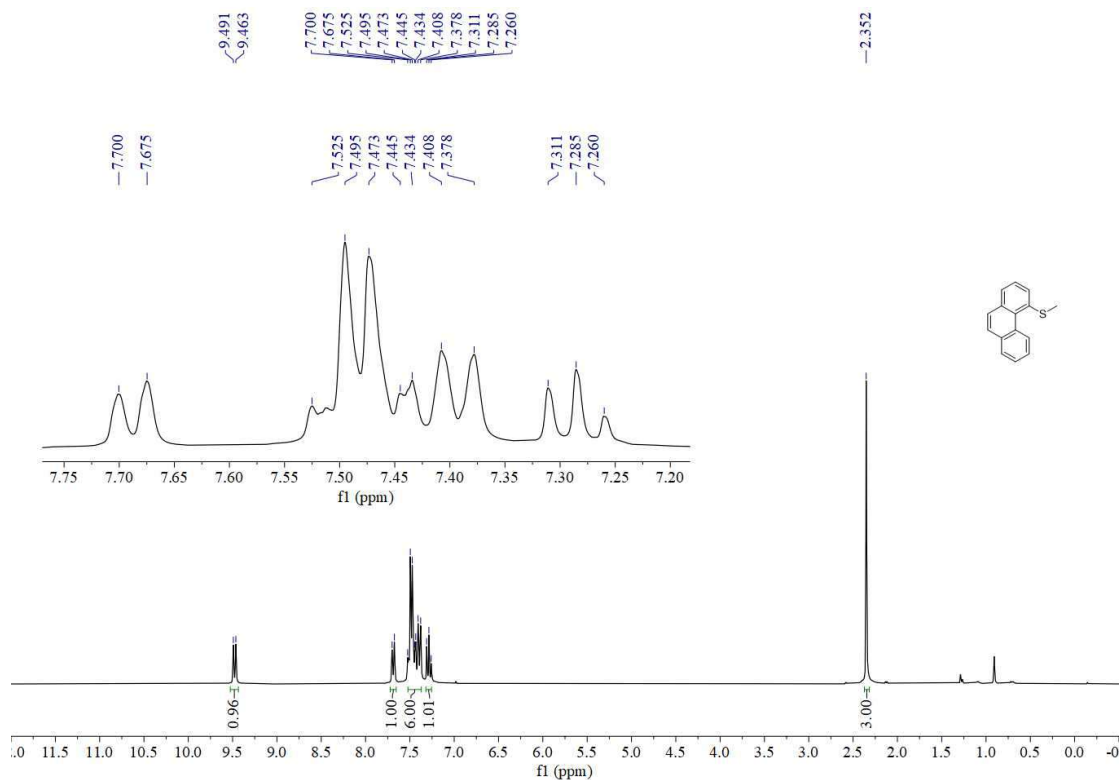

$^{13}\text{C}\{^1\text{H}\}$  NMR spectrum of **1r** in  $\text{CDCl}_3$  (75 MHz)

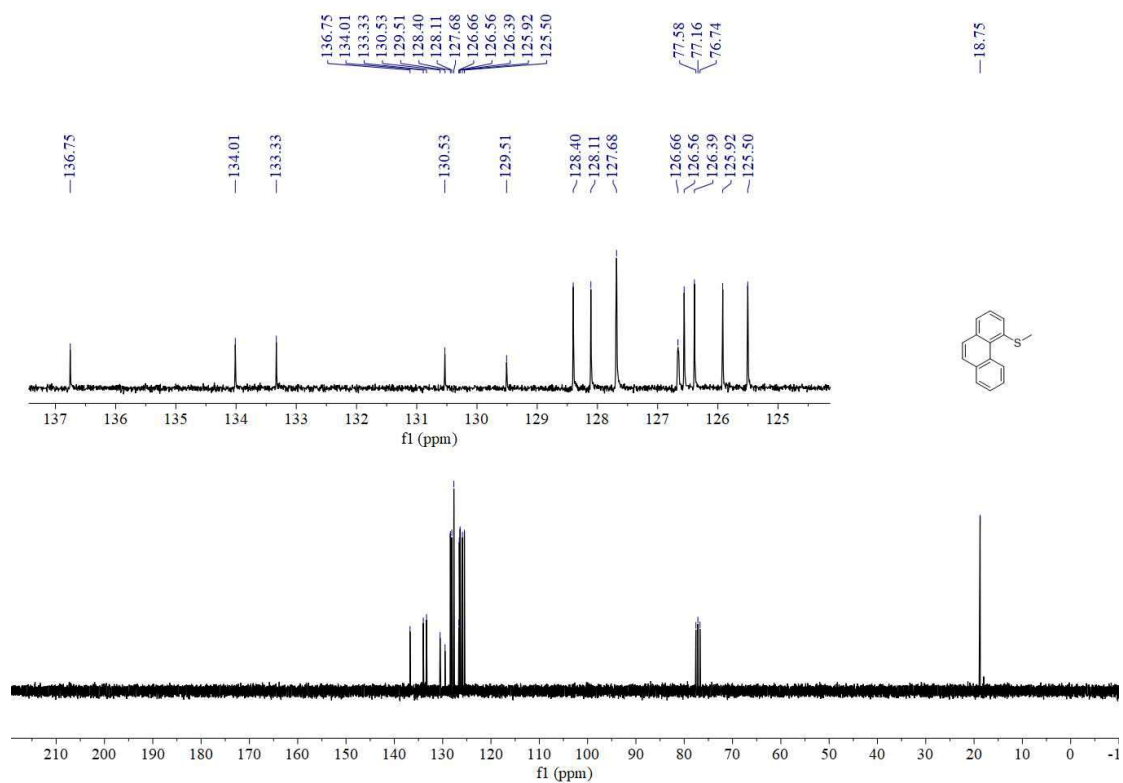

$^1\text{H}$  NMR spectrum of **5c** in  $\text{CDCl}_3$  (300 MHz)

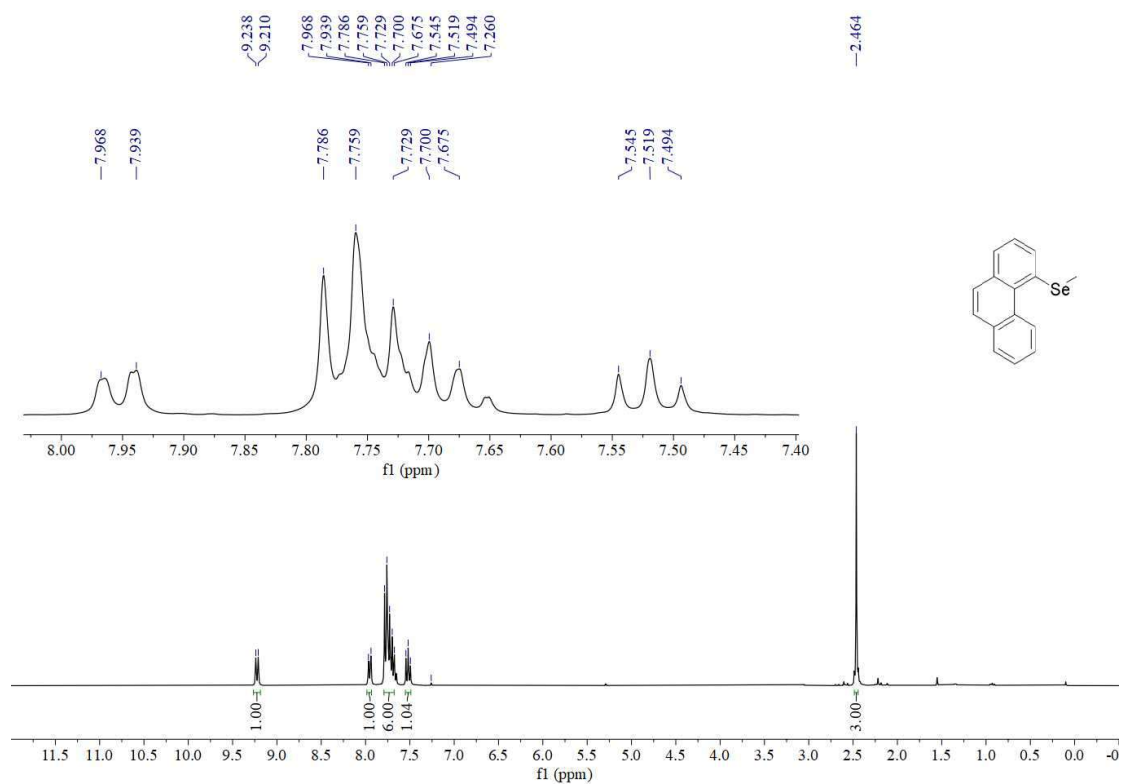

$^{13}\text{C}\{^1\text{H}\}$  NMR spectrum of **5c** in  $\text{CDCl}_3$  (75 MHz)

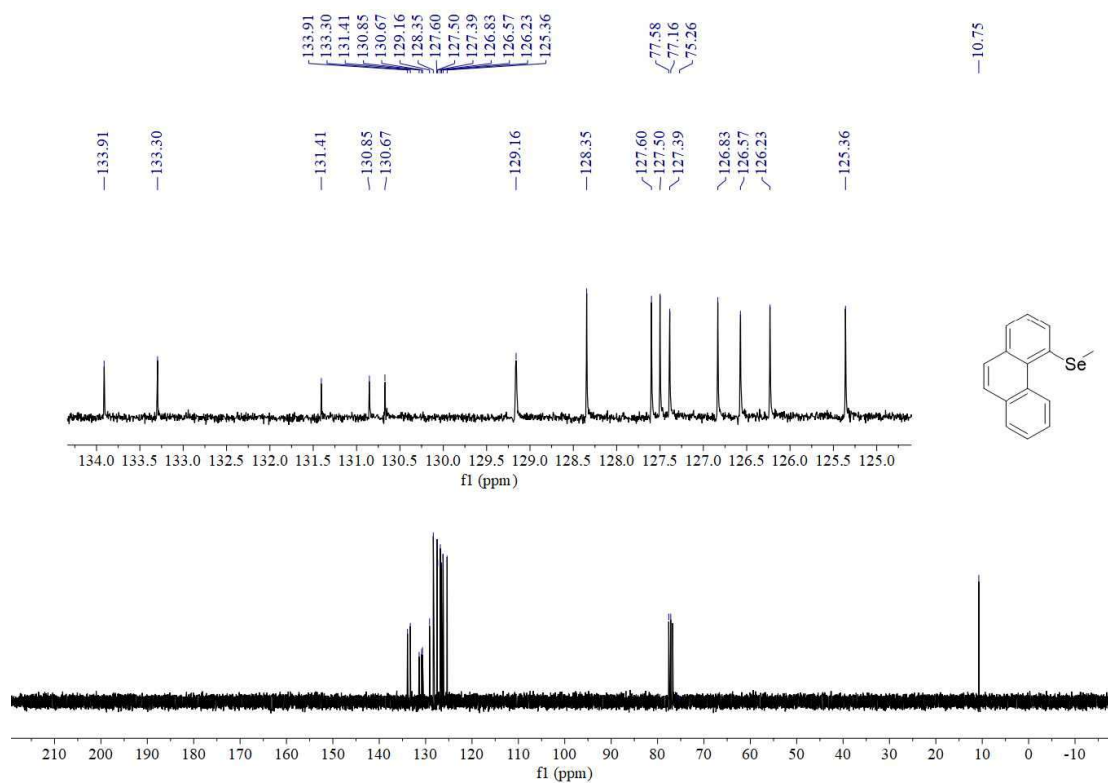

Chemical structure of **[D<sub>5</sub>]-1m** is shown as an inset. The structure is a benzene ring with a methylthio group (-SMe) at position 1 and deuterium atoms at positions 2, 3, 4, 5, and 6. The <sup>1</sup>H NMR spectrum (400 MHz, CDCl<sub>3</sub>) shows the following peaks (ppm):

- 7.431, 7.383, 7.356, 7.349, 7.329, 7.304, 7.278, 7.260, 7.229, 7.209, 7.184 (aromatic region)
- 2.380 (methylthio group)
- 0.0 (TMS)

Integration values are provided for the peaks: 1.03, 1.02, 2.00 for the aromatic region and 3.01 for the methylthio group.

**[D]-2a**

c1ccc2c(c1)sc(C)cc2

<sup>1</sup>H NMR spectrum (CDCl<sub>3</sub>) of compound **[D]-2a**. The spectrum displays aromatic signals in the range of 7.2–8.1 ppm and aliphatic signals in the range of 0.9–1.1 ppm. Integration values are provided below the baseline.

Chemical structure of **[D]-2a** is shown in the top right corner.

$^1\text{H}$  NMR spectrum of **3a** in  $\text{CDCl}_3$  (300 MHz)

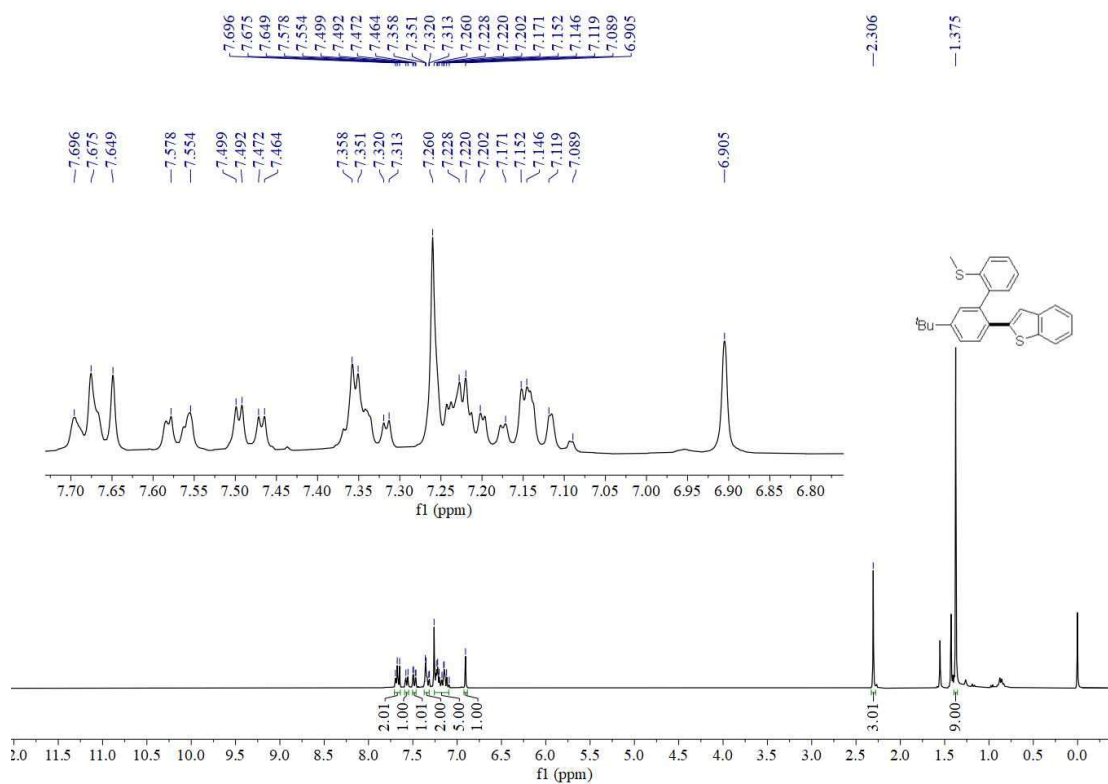

$^{13}\text{C}\{^1\text{H}\}$  NMR spectrum of **3a** in  $\text{CDCl}_3$  (75 MHz)

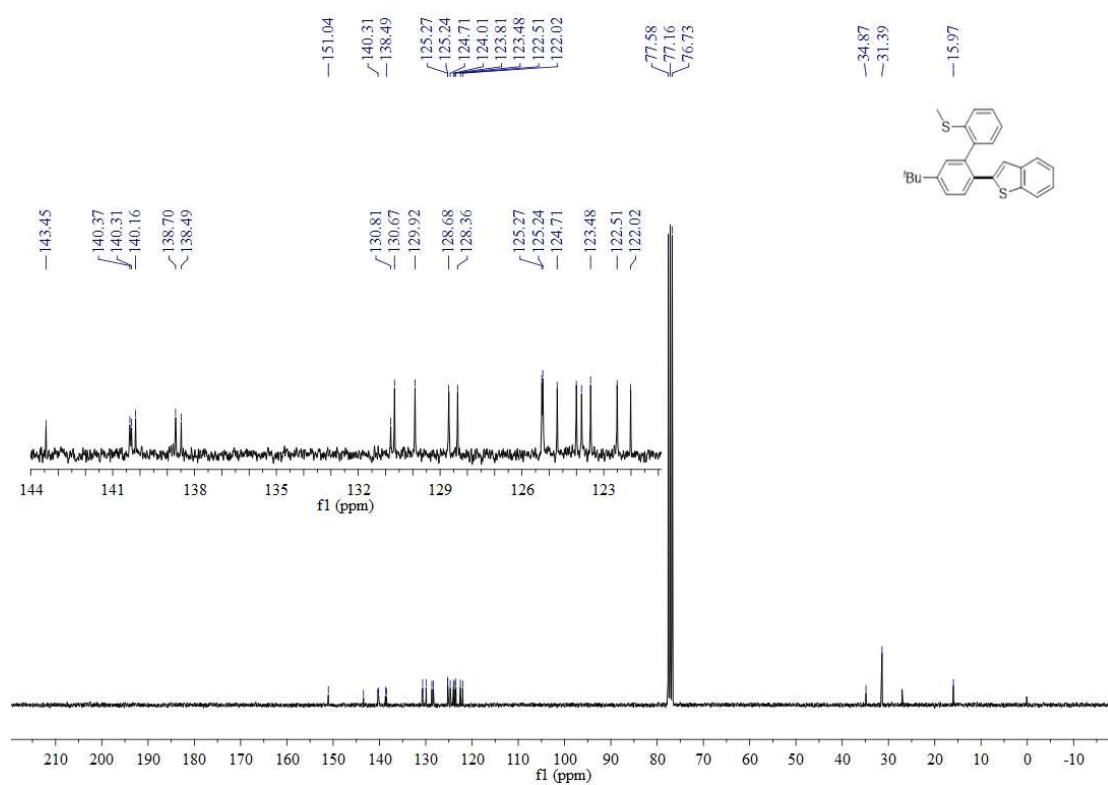

$^1\text{H}$  NMR spectrum of **3b** in  $\text{CDCl}_3$  (300 MHz)

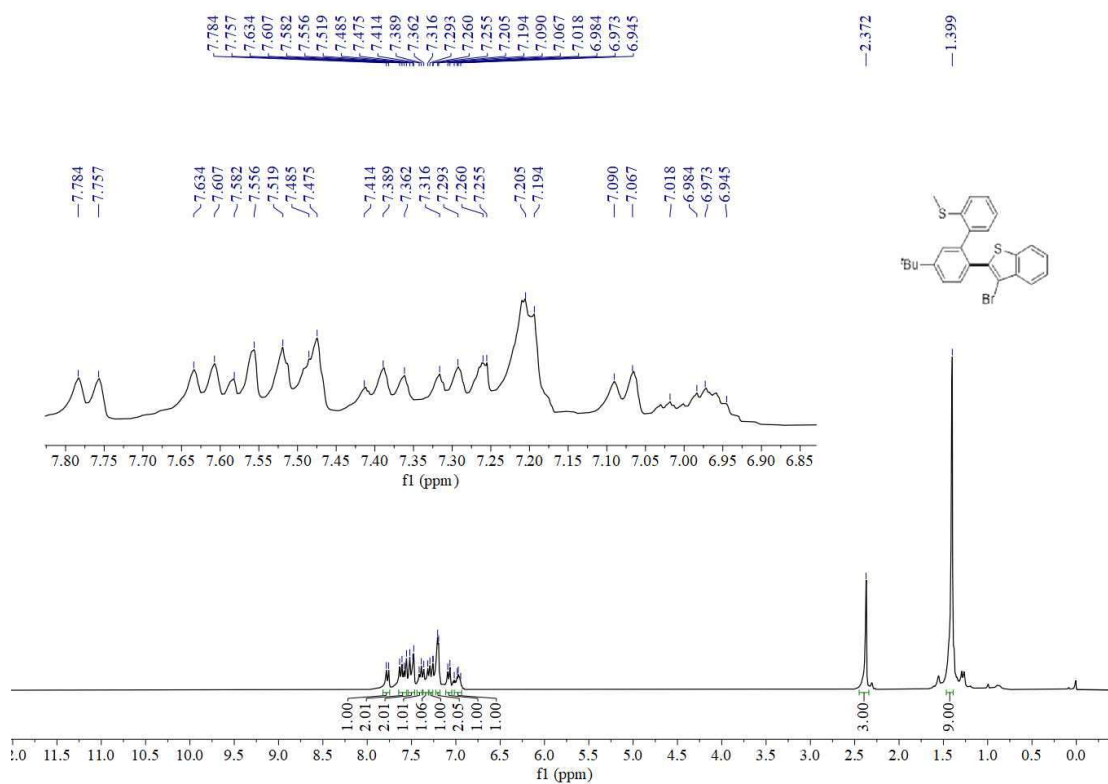

$^{13}\text{C}\{^1\text{H}\}$  NMR spectrum of **3b** in  $\text{CDCl}_3$  (75 MHz)

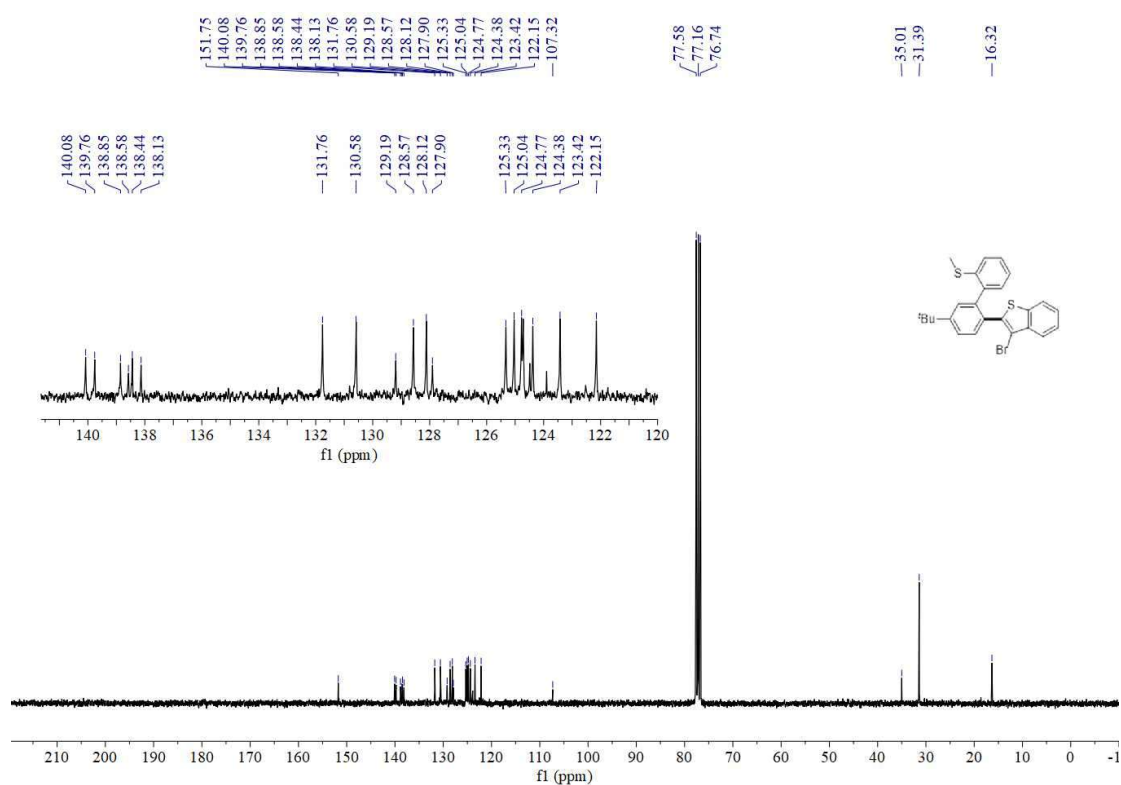

$^1\text{H}$  NMR spectrum of **3c** in  $\text{CDCl}_3$  (300 MHz)

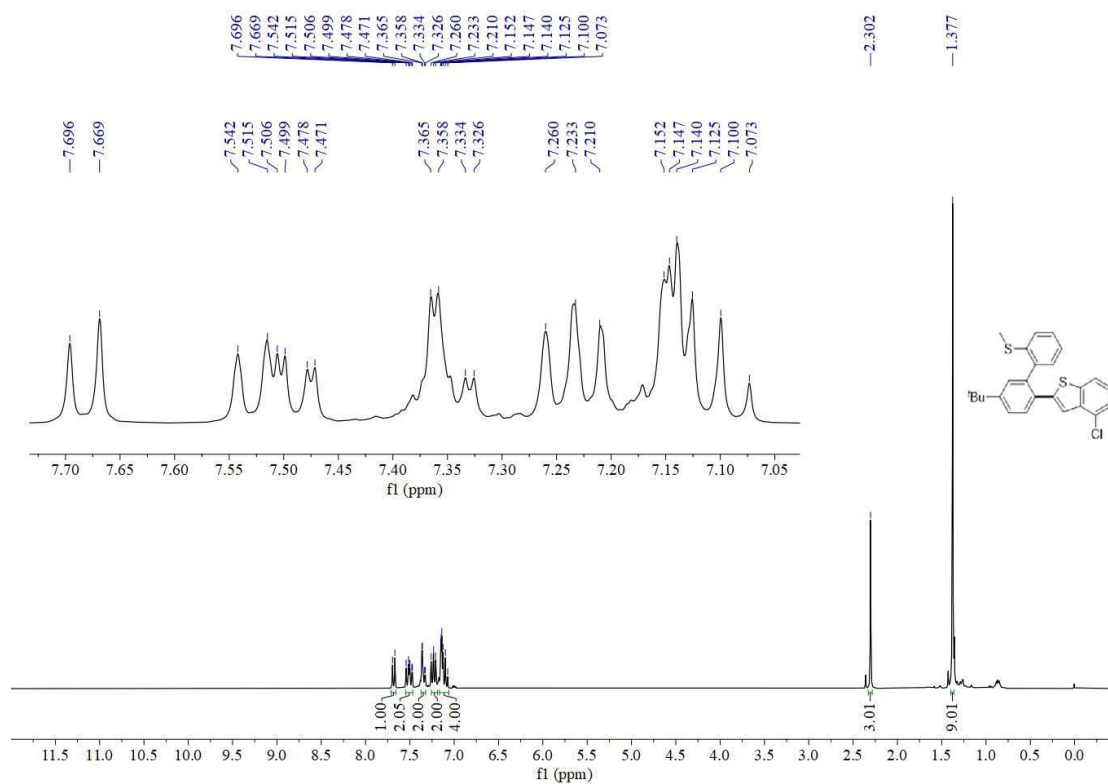

$^{13}\text{C}\{^1\text{H}\}$  NMR spectrum of **3c** in  $\text{CDCl}_3$  (75 MHz)

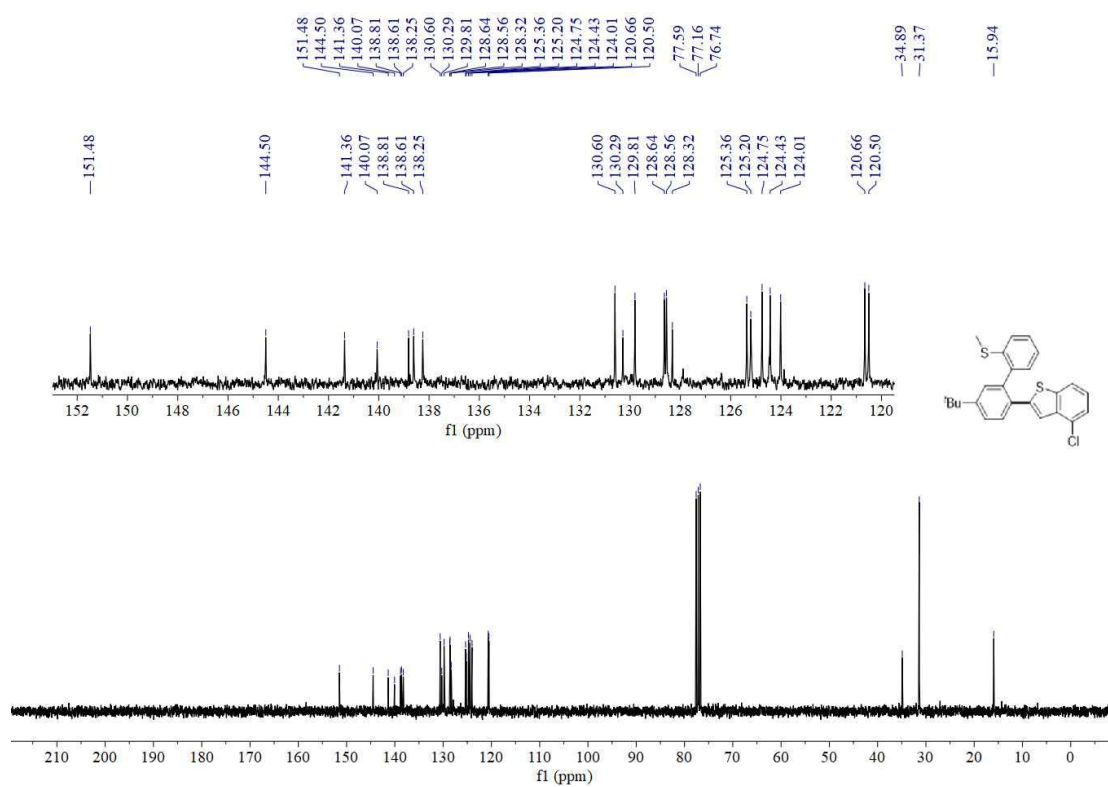

$^1\text{H}$  NMR spectrum of **3d** in  $\text{CDCl}_3$  (300 MHz)

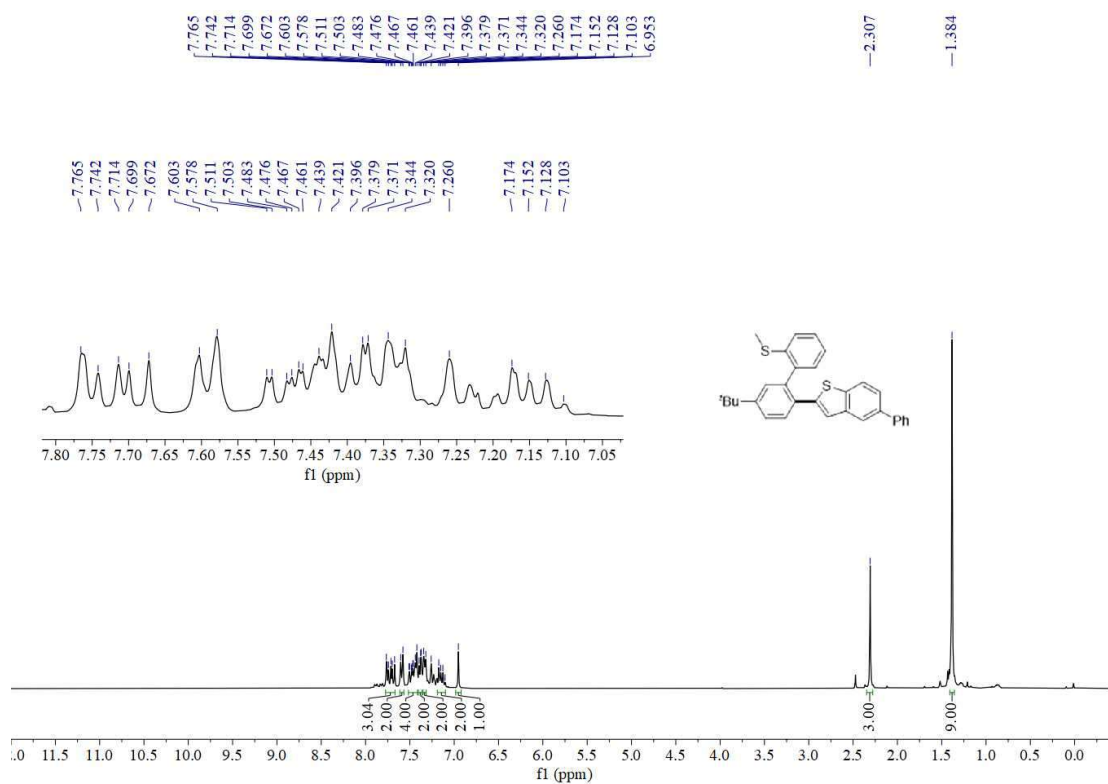

$^{13}\text{C}\{^1\text{H}\}$  NMR spectrum of **3d** in  $\text{CDCl}_3$  (75 MHz)

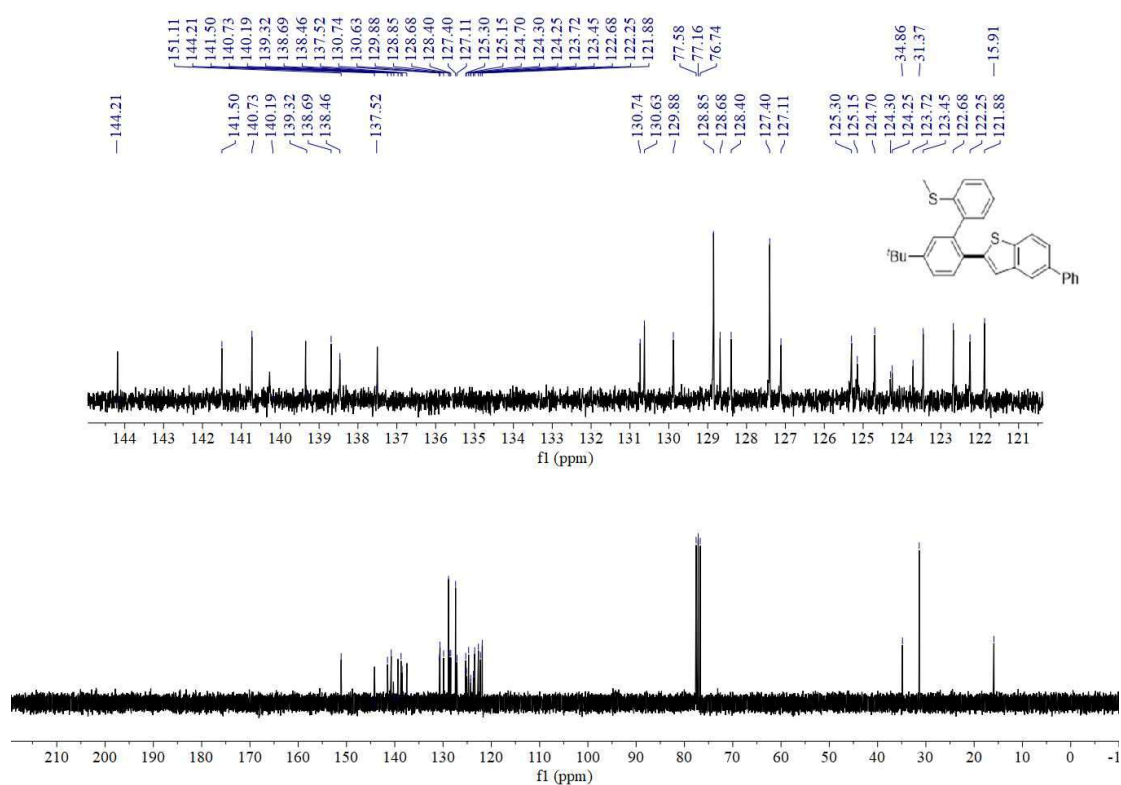



$^1\text{H}$  NMR spectrum of **3e** in  $\text{CDCl}_3$  (300 MHz)

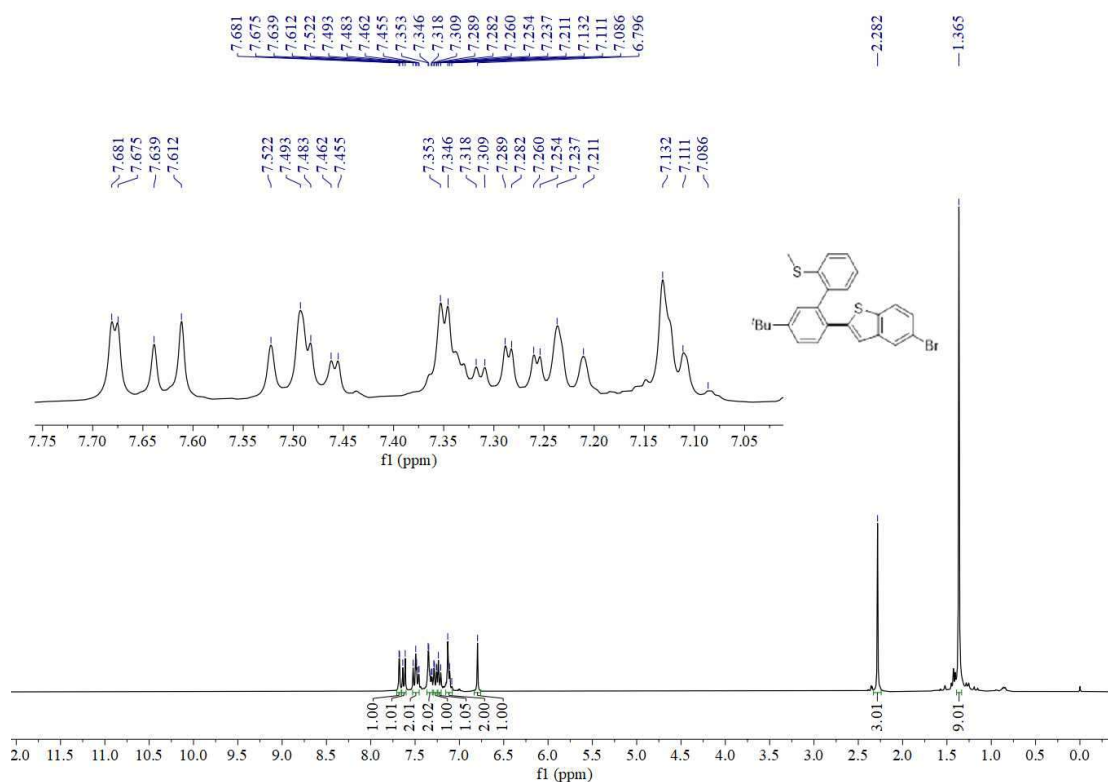

$^{13}\text{C}\{^1\text{H}\}$  NMR spectrum of **3e** in  $\text{CDCl}_3$  (75 MHz)

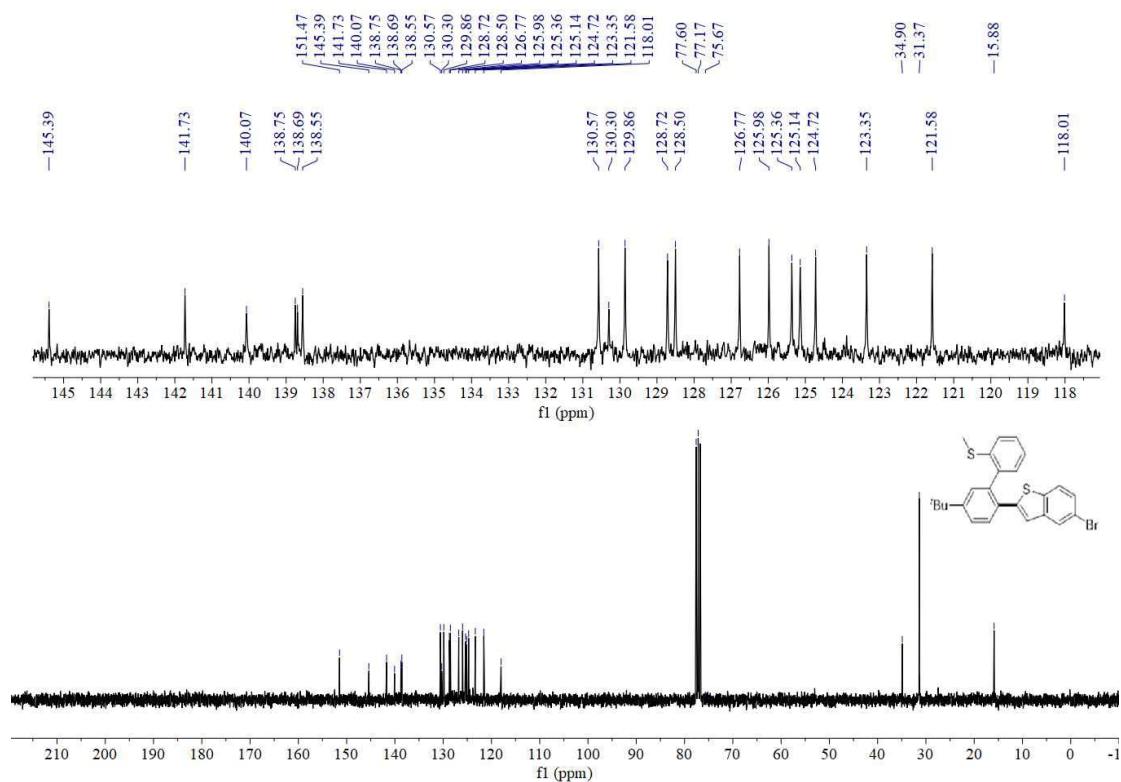

**Chemical structure of 10:** CC(C)(C)c1ccc(cc1-c2cc3ccccc3s2)S(=O)(=O)c4ccccc4

**<sup>1</sup>H NMR spectrum (CDCl<sub>3</sub>):**

- Chemical shift range:** 0.001 to 8.334 ppm.
- Integration values:** 0.90, 1.00, 1.00, 1.00, 1.01, 1.00, 2.00, 2.00, 2.93, 9.00, 3.03.
- Peak assignments (ppm):** 7.834, 7.829, 7.596, 7.568, 7.471, 7.464, 7.444, 7.437, 7.375, 7.355, 7.314, 7.307, 7.277, 7.273, 7.260, 7.247, 7.221, 7.166, 7.141, 7.120, 7.114, 7.088, 4.293, 4.269, 4.245, 4.221, 2.307, 1.358, 1.341, 1.317, 1.293, 0.001.

Chemical structure of compound 10 is shown as an inset:

CC1=CC=C(C=C1)S2C(=C(C(=O)OCC)C=C2)C3=CC=C(C=C3)C4=CC=C(C=C4)C5=CC=CC=C5C

$^1\text{H}$  NMR spectrum of **3g** in  $\text{CDCl}_3$  (300 MHz)

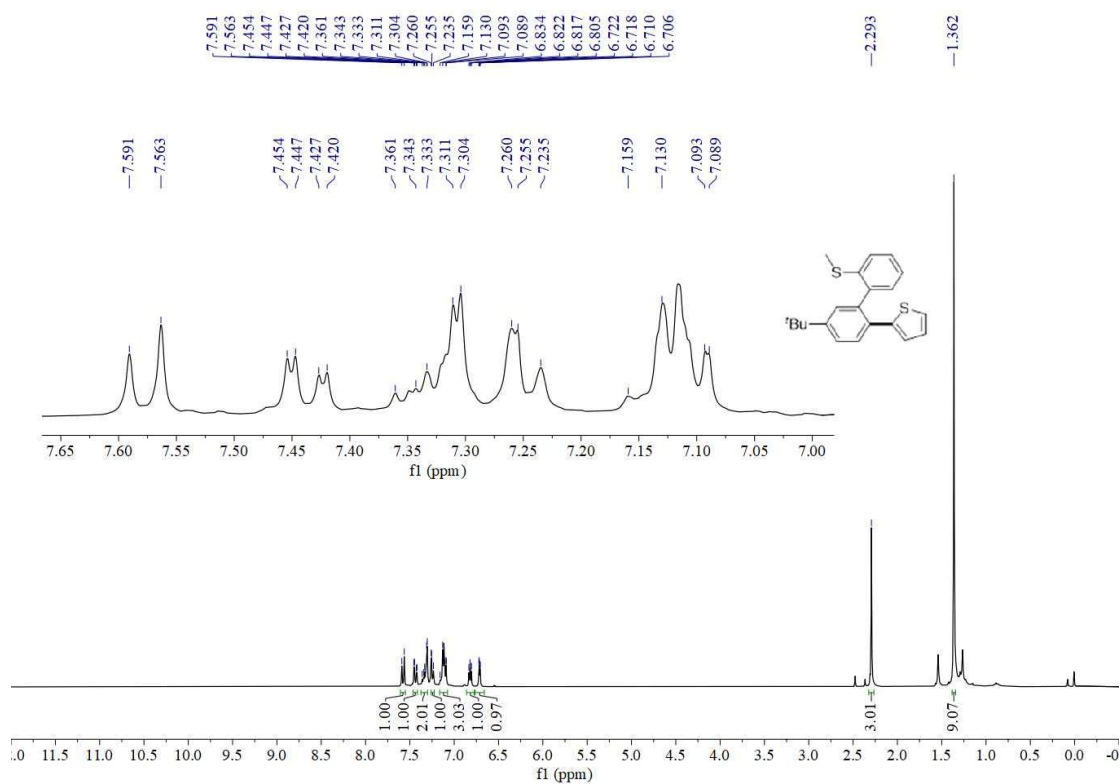

$^{13}\text{C}\{^1\text{H}\}$  NMR spectrum of **3g** in  $\text{CDCl}_3$  (75 MHz)

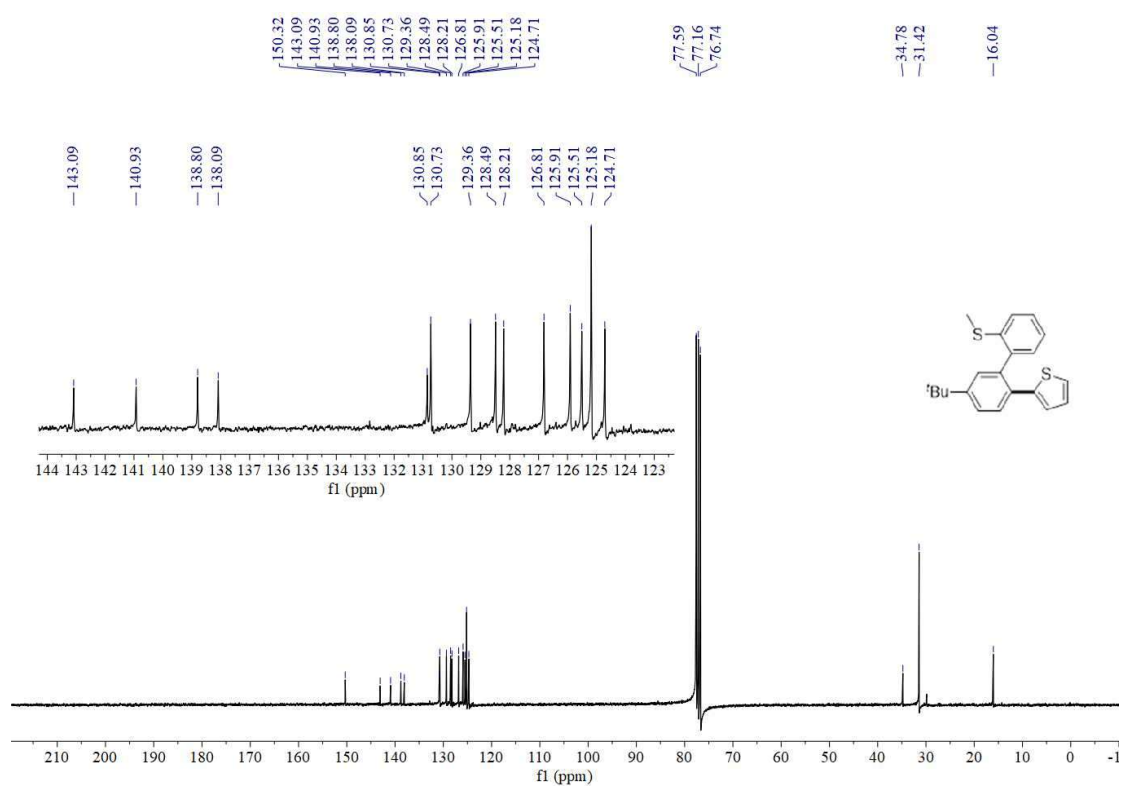

$^1\text{H}$  NMR spectrum of **3h** in  $\text{CDCl}_3$  (300 MHz)

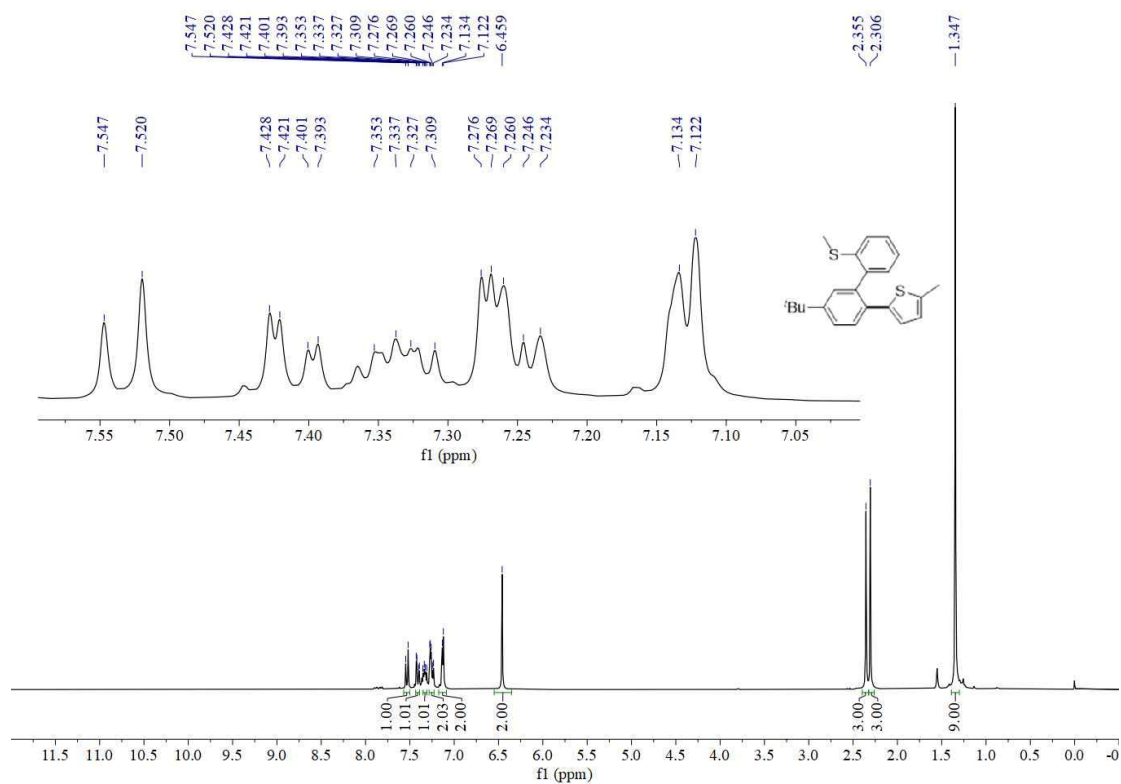

$^{13}\text{C}\{^1\text{H}\}$  NMR spectrum of **3h** in  $\text{CDCl}_3$  (75 MHz)

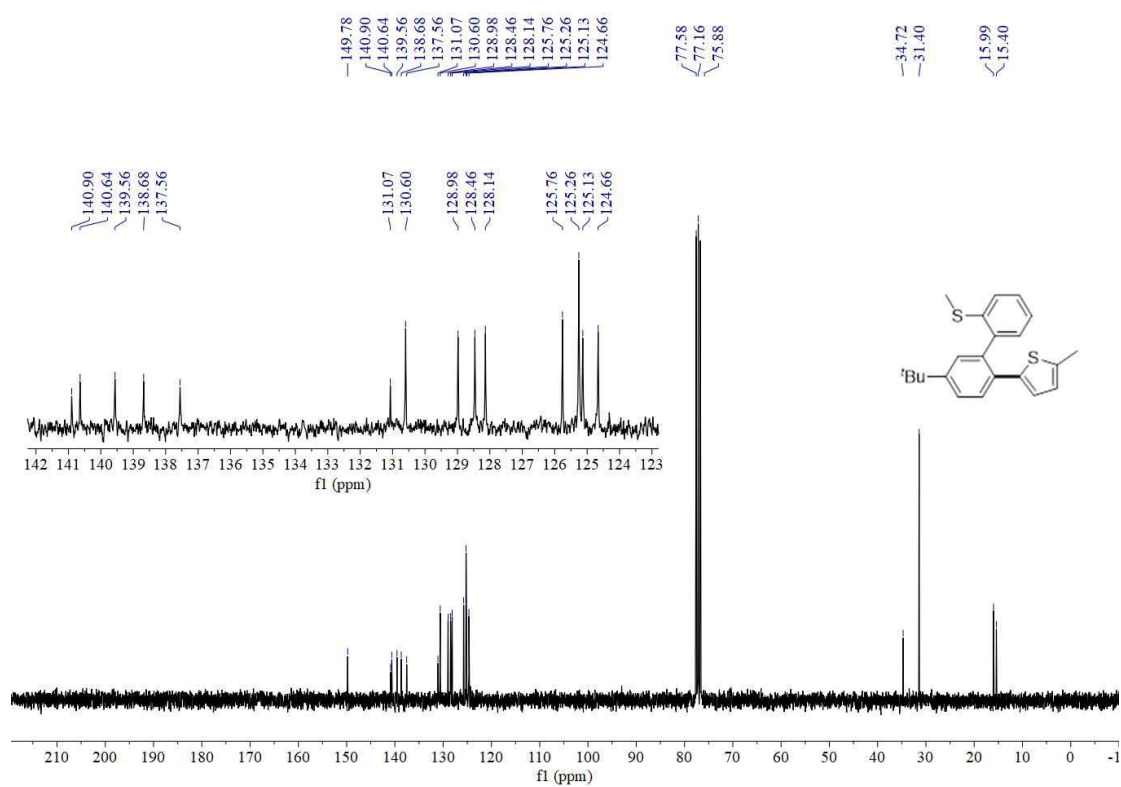

$^1\text{H}$  NMR spectrum of **3i** in  $\text{CDCl}_3$  (300 MHz)

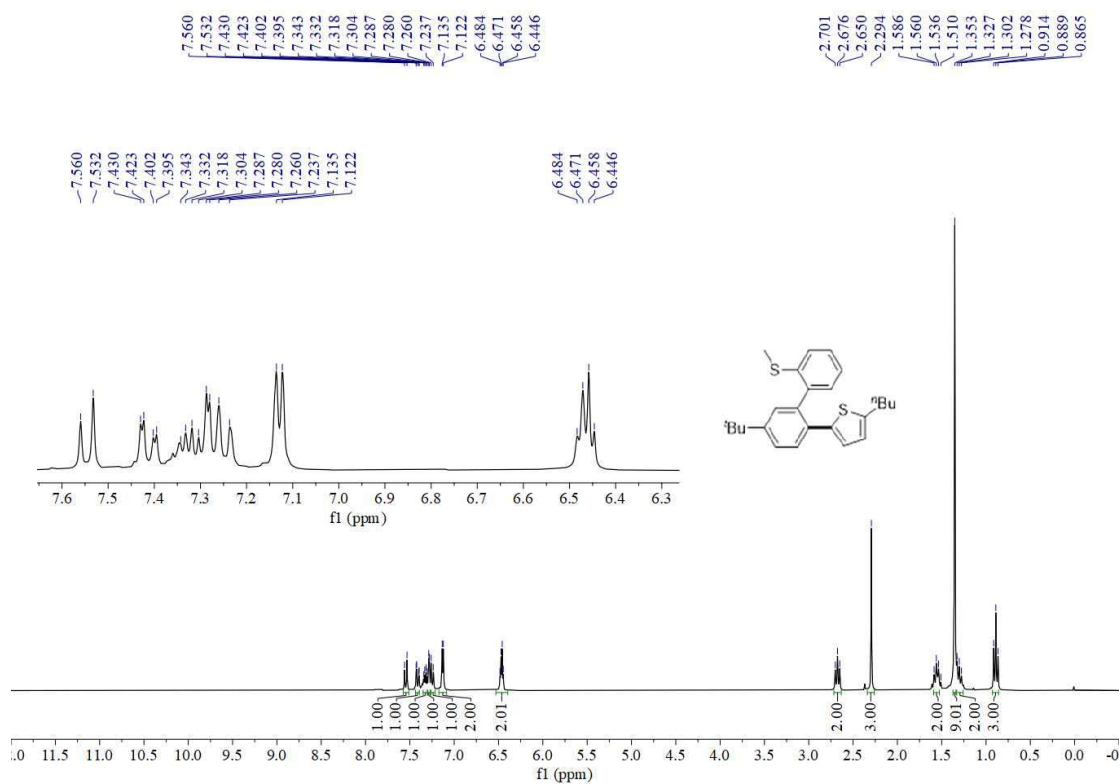

$^{13}\text{C}\{^1\text{H}\}$  NMR spectrum of **3i** in  $\text{CDCl}_3$  (75 MHz)

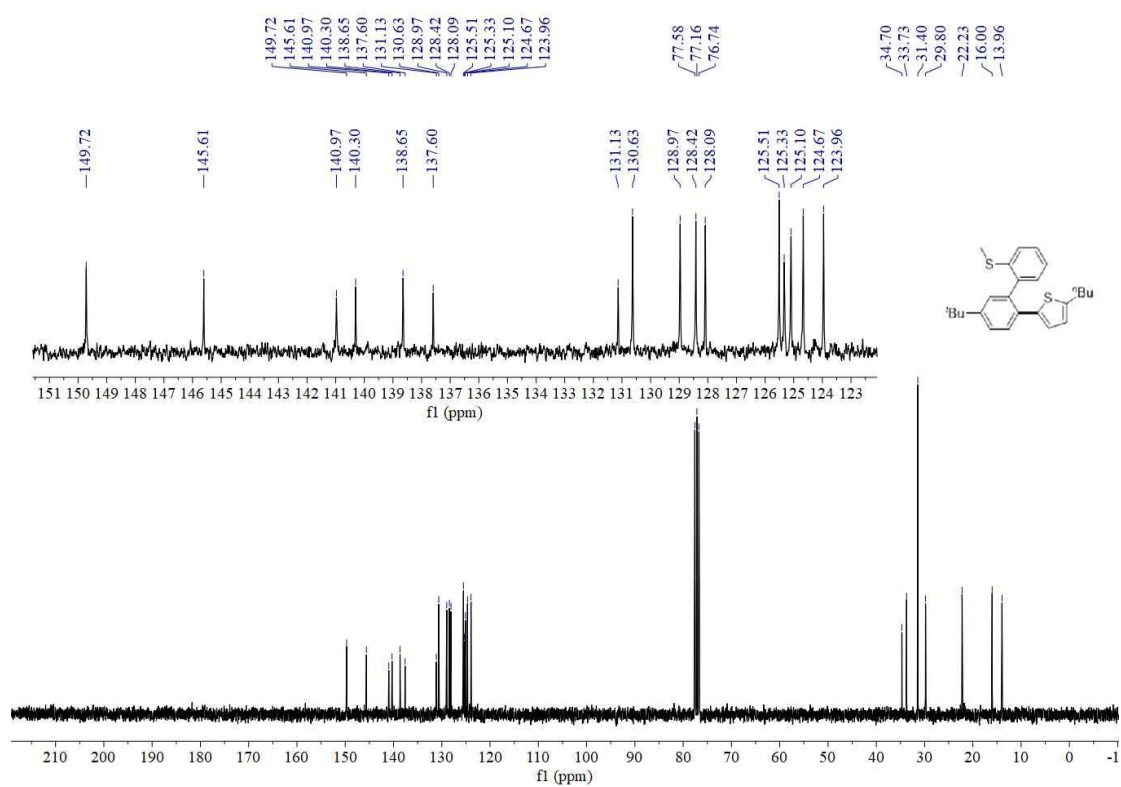

$^1\text{H}$  NMR spectrum of **3j** in  $\text{CDCl}_3$  (300 MHz)

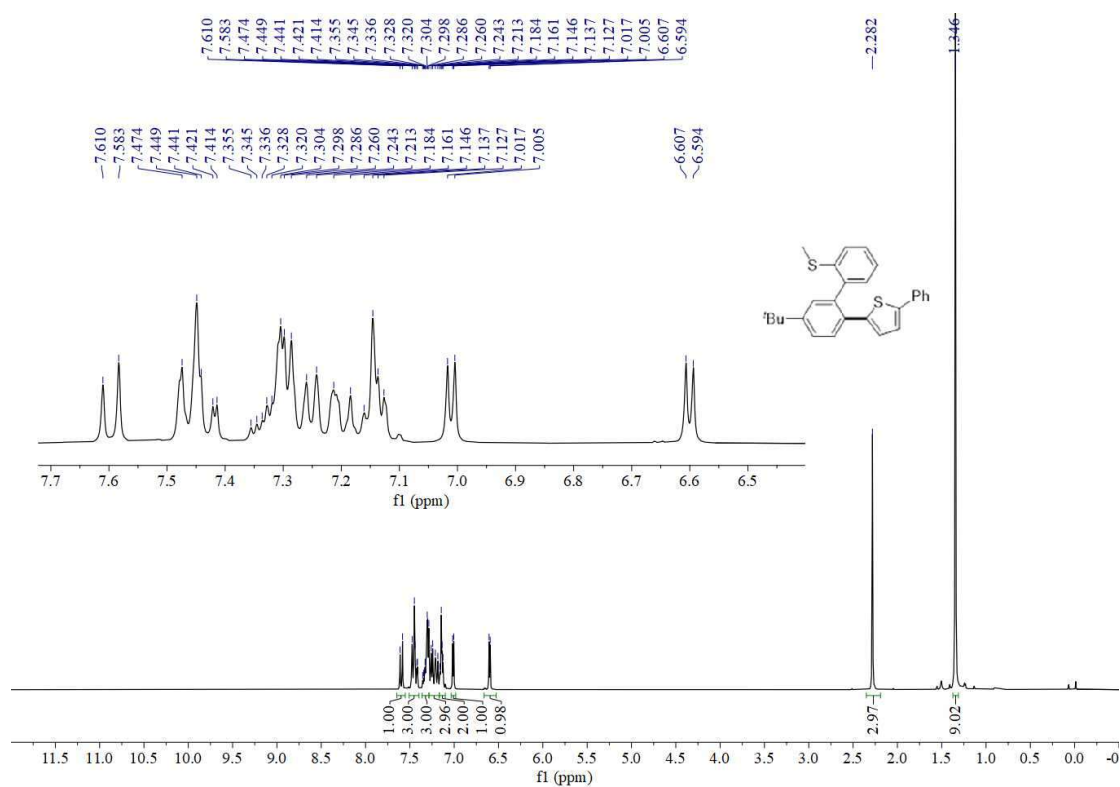

$^{13}\text{C}\{^1\text{H}\}$  NMR spectrum of **3j** in  $\text{CDCl}_3$  (75 MHz)

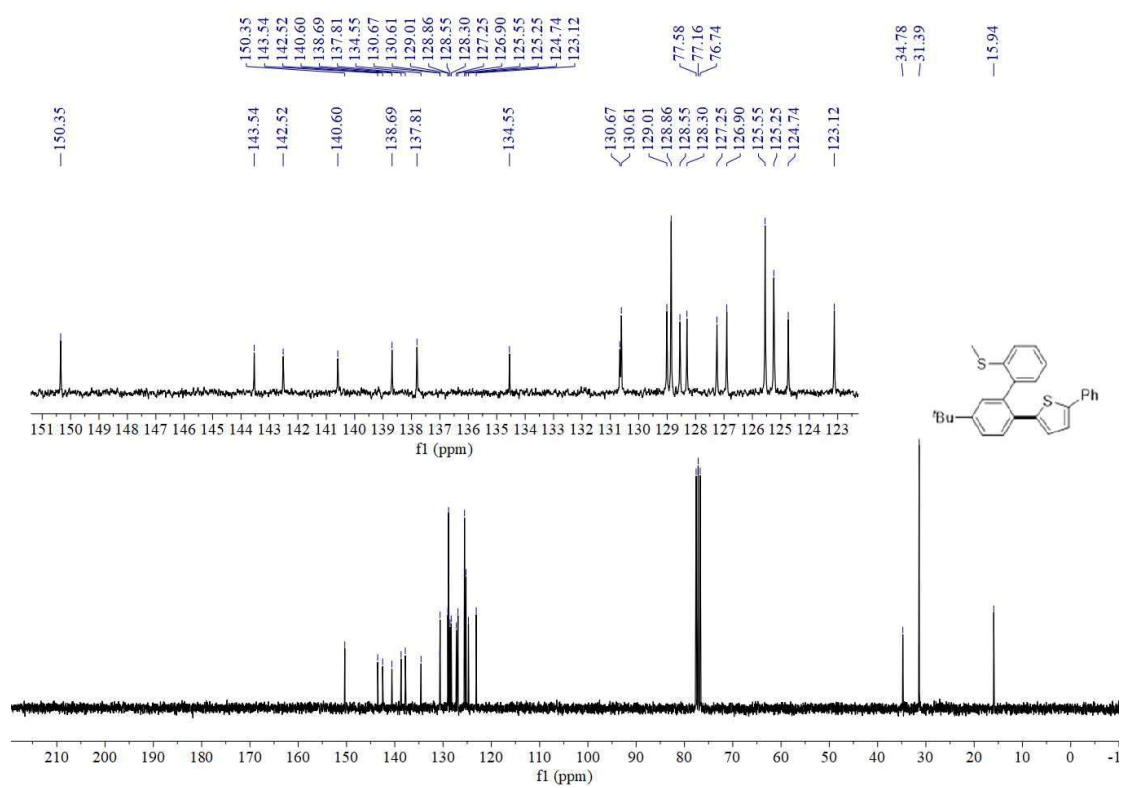



$^1\text{H}$  NMR spectrum of **3k** in  $\text{CDCl}_3$  (300 MHz)

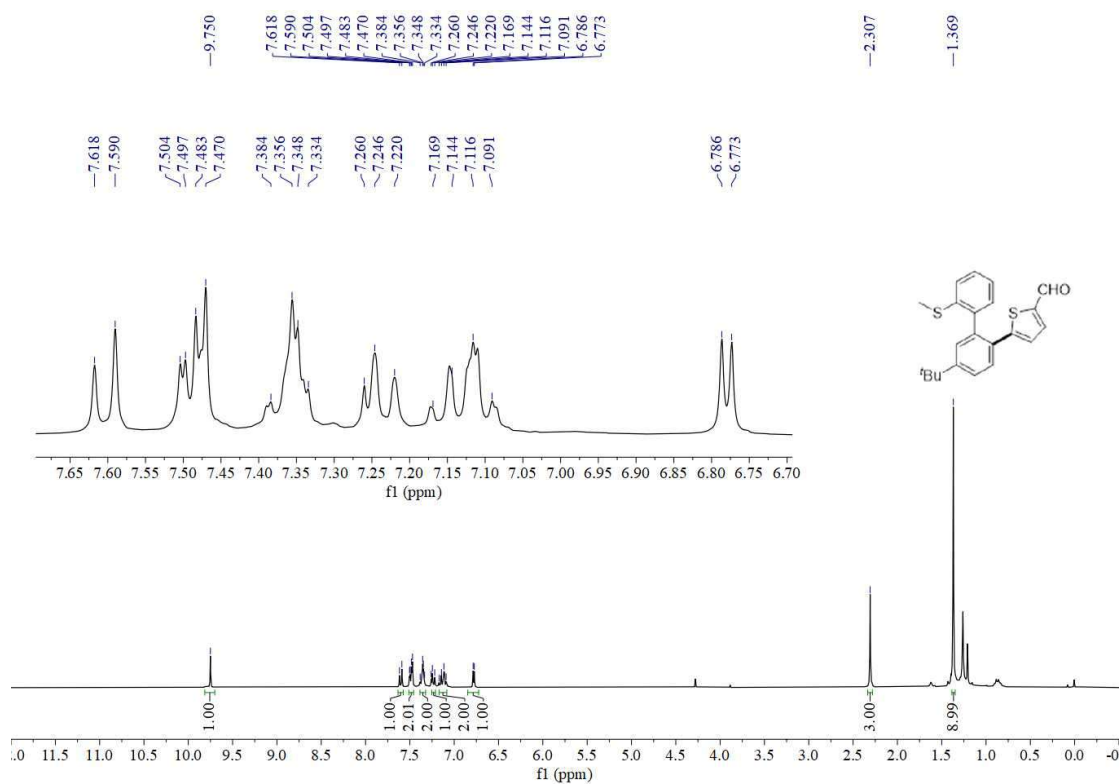

$^{13}\text{C}\{^1\text{H}\}$  NMR spectrum of **3k** in  $\text{CDCl}_3$  (75 MHz)

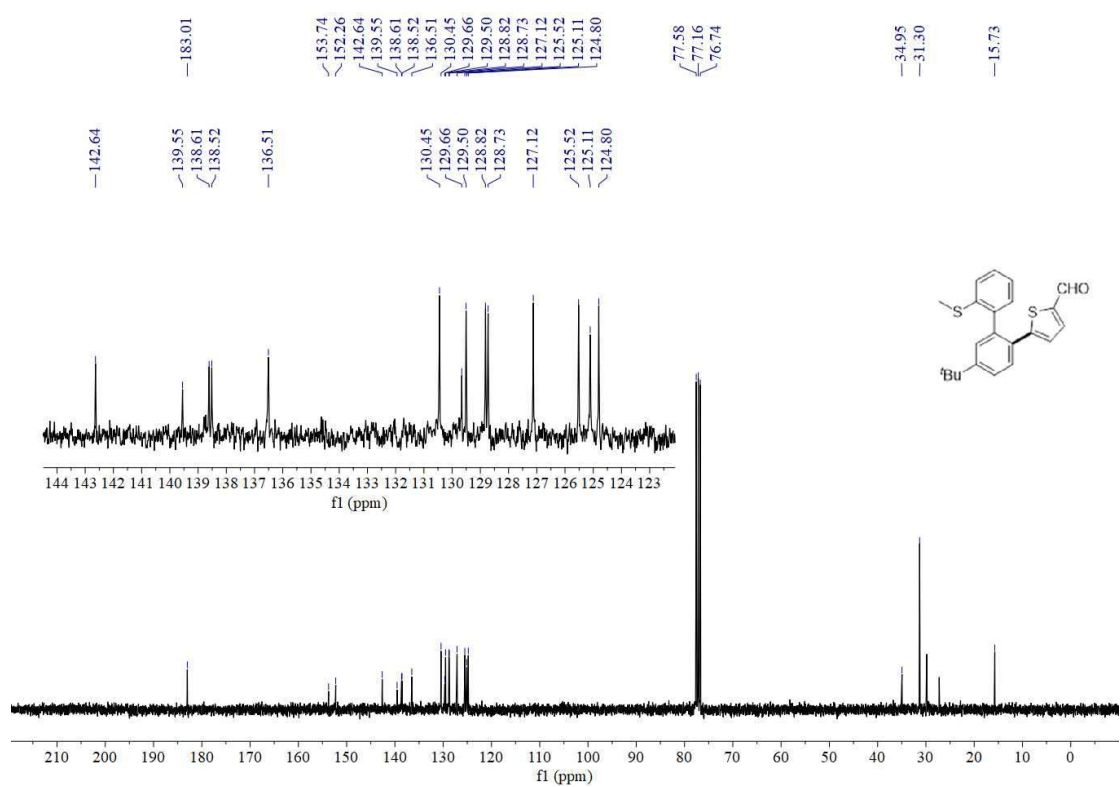

$^1\text{H}$  NMR spectrum of **31** in  $\text{CDCl}_3$  (300 MHz)

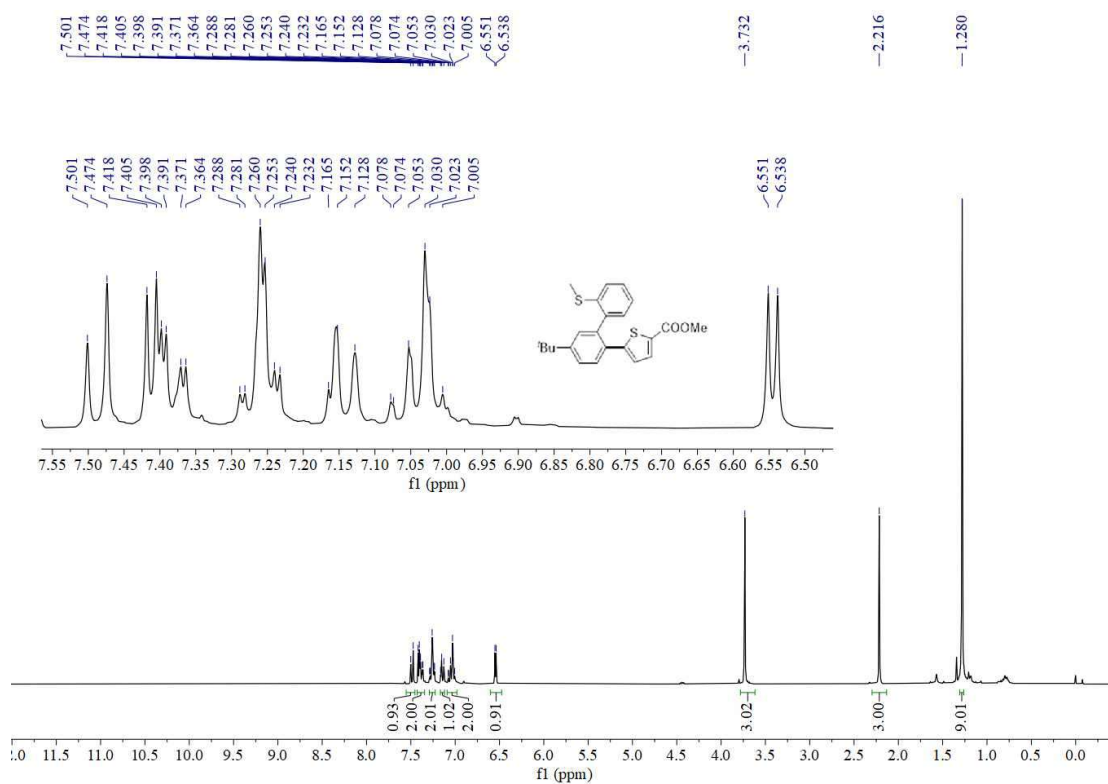

$^{13}\text{C}\{^1\text{H}\}$  NMR spectrum of **31** in  $\text{CDCl}_3$  (75 MHz)

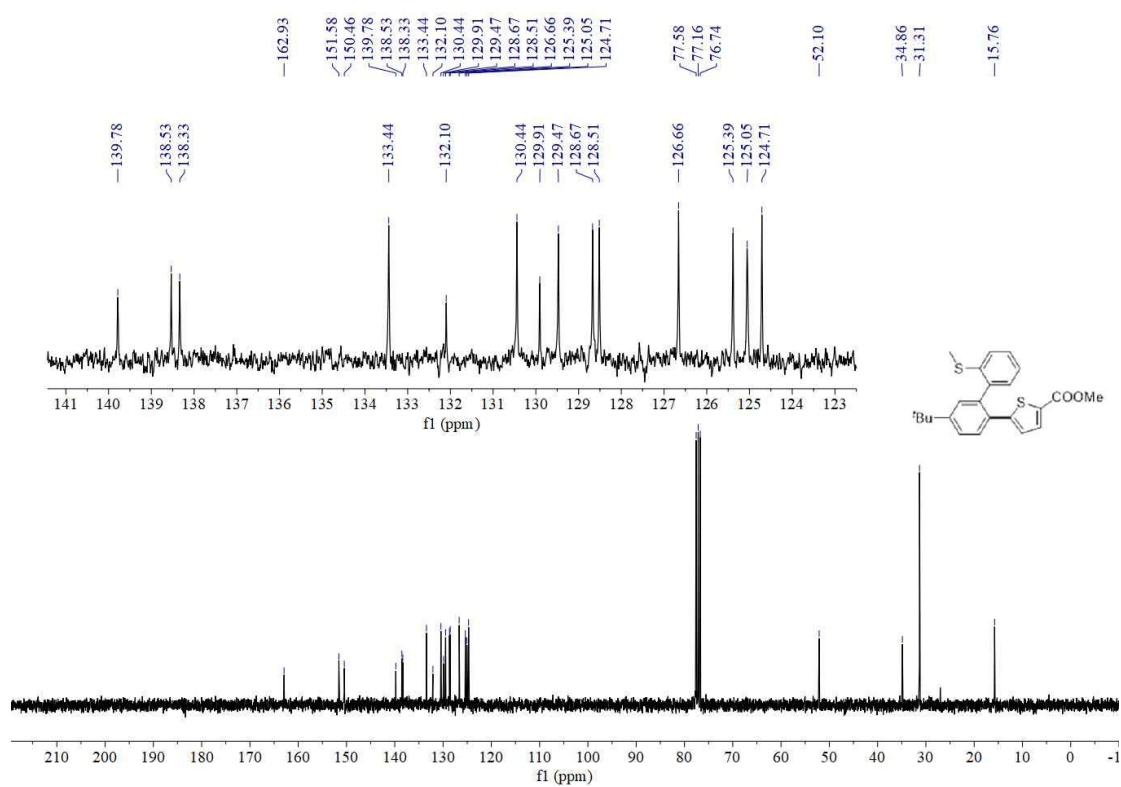



$^1\text{H}$  NMR spectrum of **3m** in  $\text{CDCl}_3$  (300 MHz)

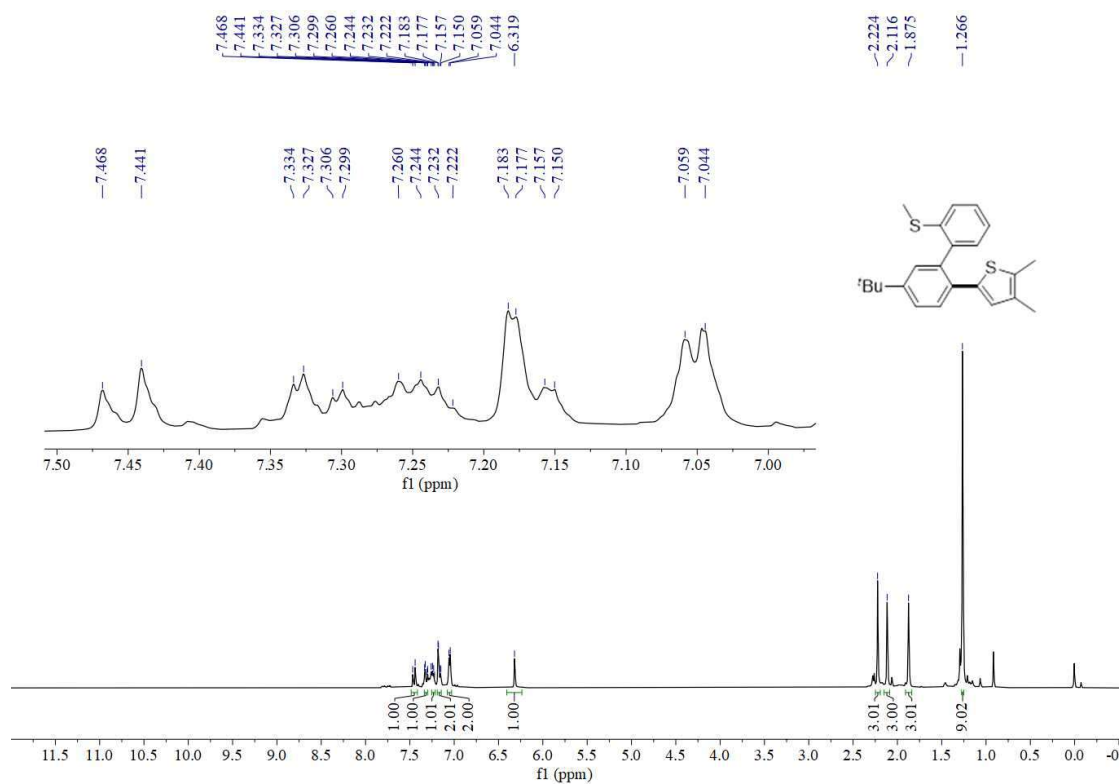

$^{13}\text{C}\{^1\text{H}\}$  NMR spectrum of **3m** in  $\text{CDCl}_3$  (75 MHz)

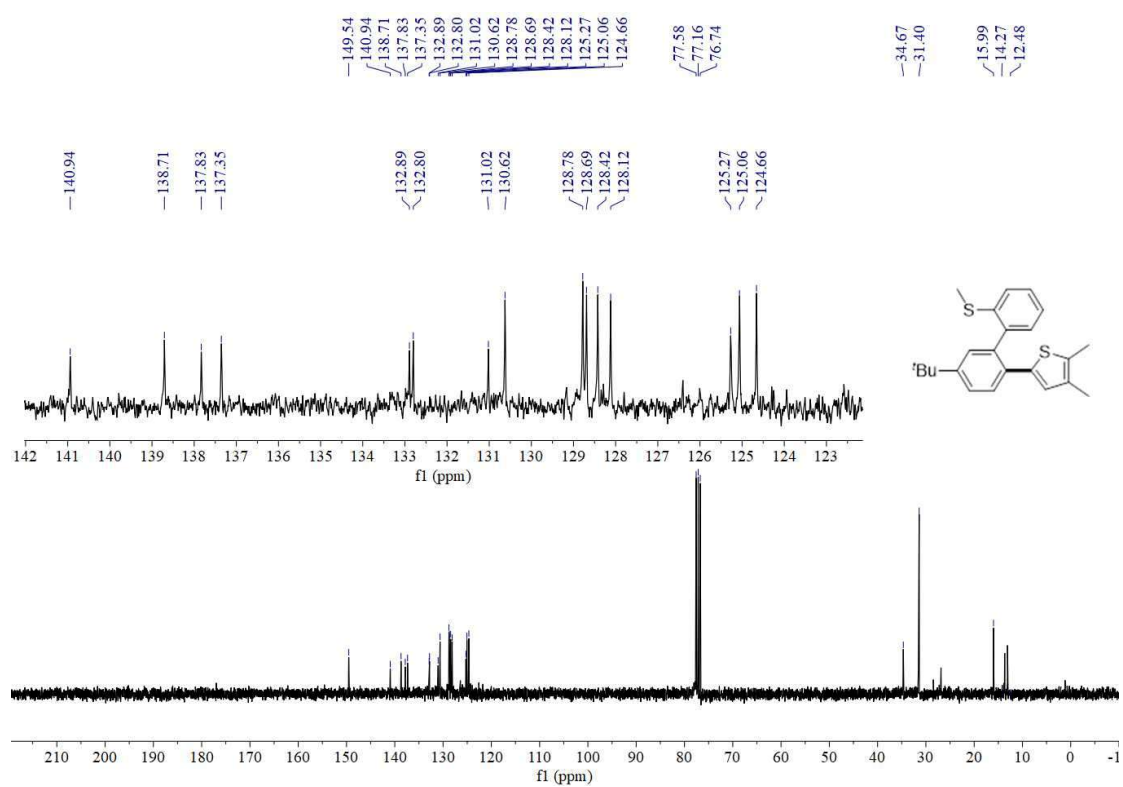

$^1\text{H}$  NMR spectrum of **3n** in  $\text{CDCl}_3$  (300 MHz)

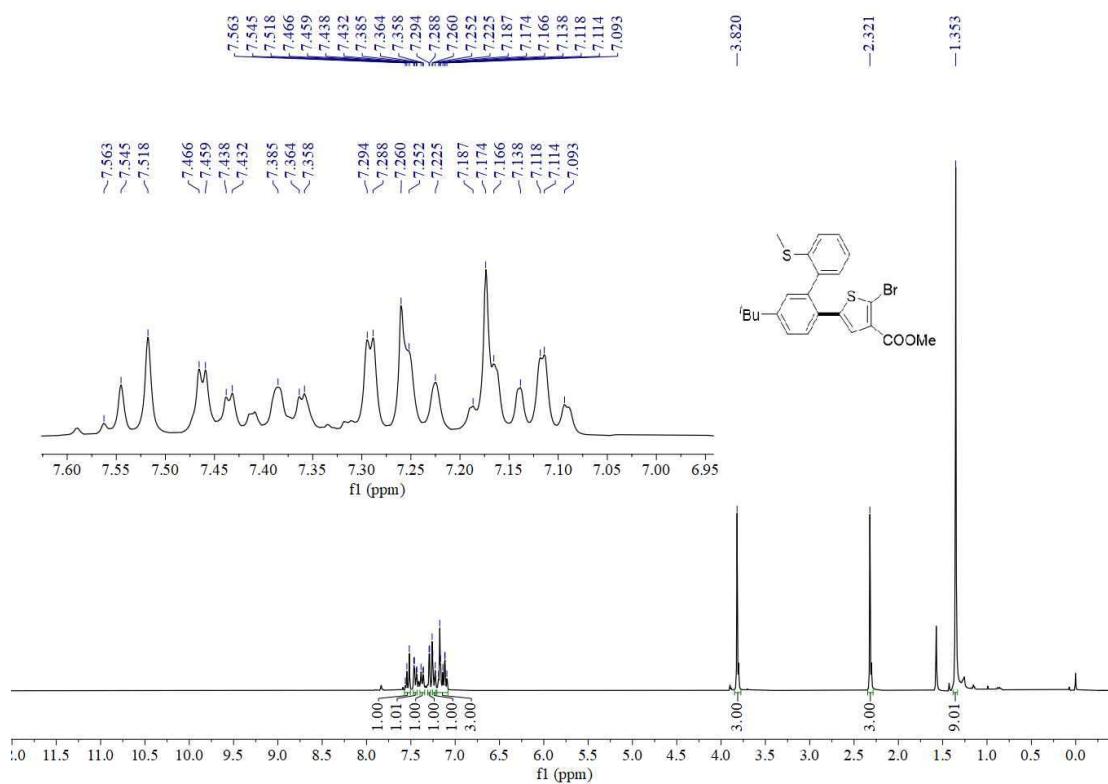

$^{13}\text{C}\{^1\text{H}\}$  NMR spectrum of **3n** in  $\text{CDCl}_3$  (75 MHz)

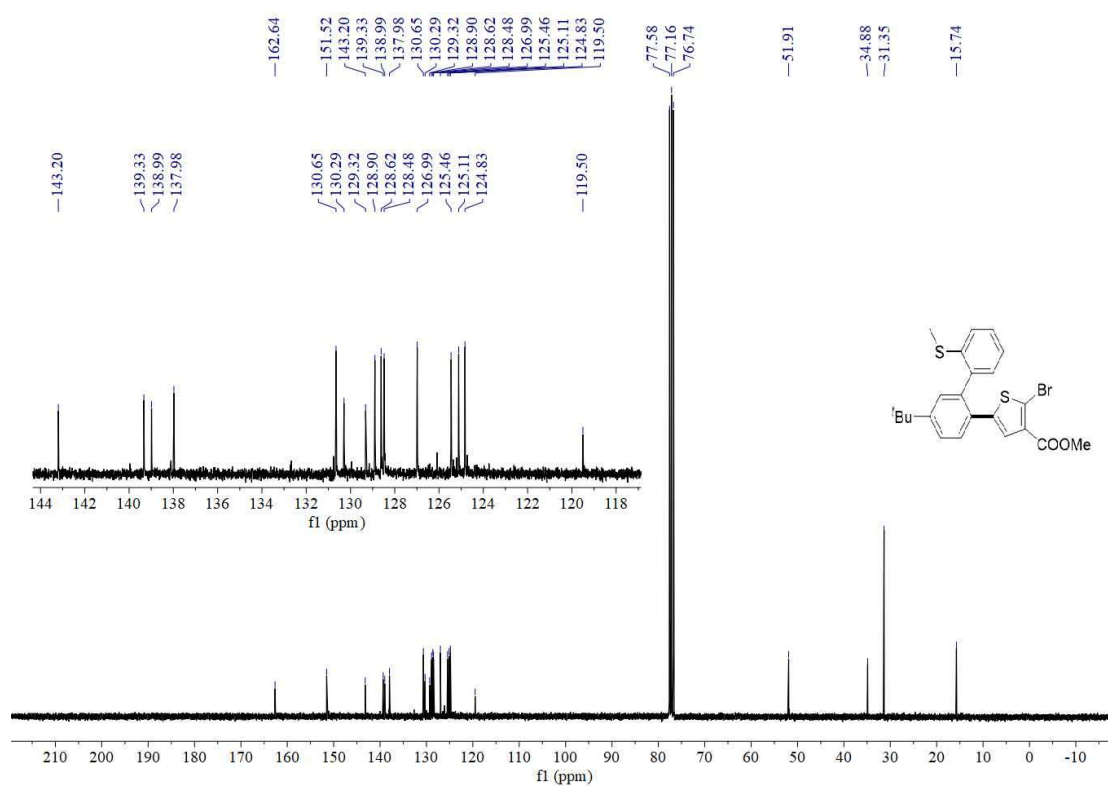

$^1\text{H}$  NMR spectrum of **3o** in  $\text{CDCl}_3$  (300 MHz)

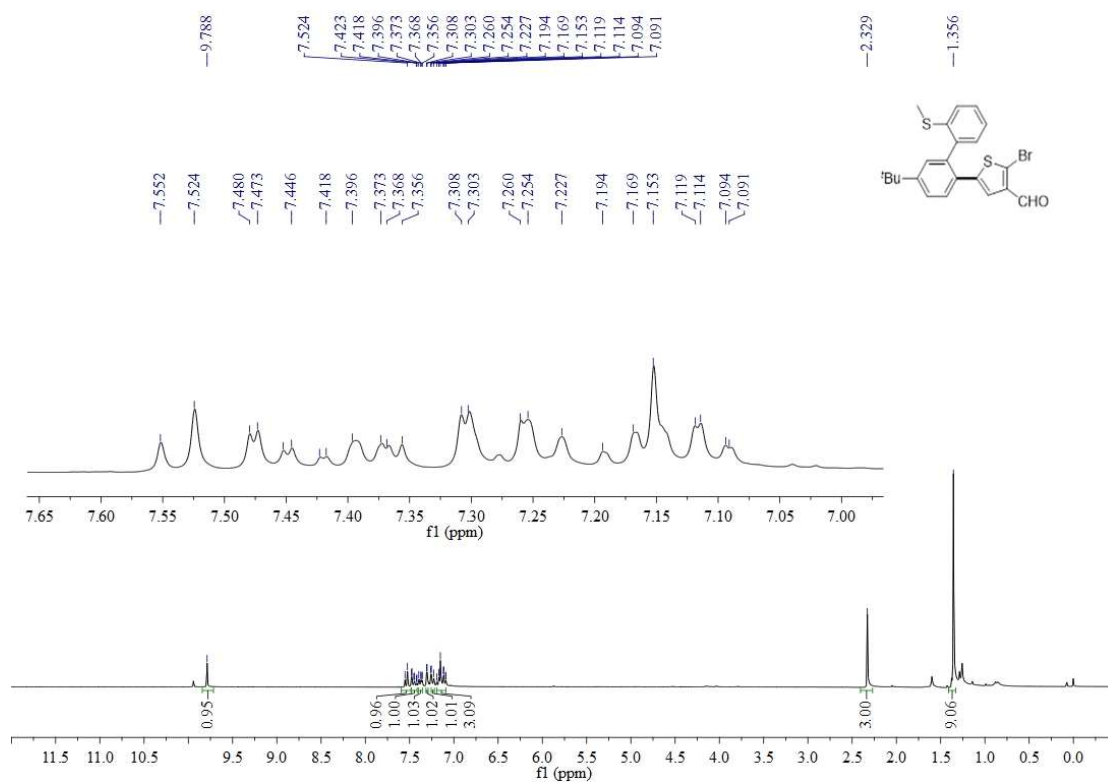

$^{13}\text{C}\{^1\text{H}\}$  NMR spectrum of **3o** in  $\text{CDCl}_3$  (75 MHz)

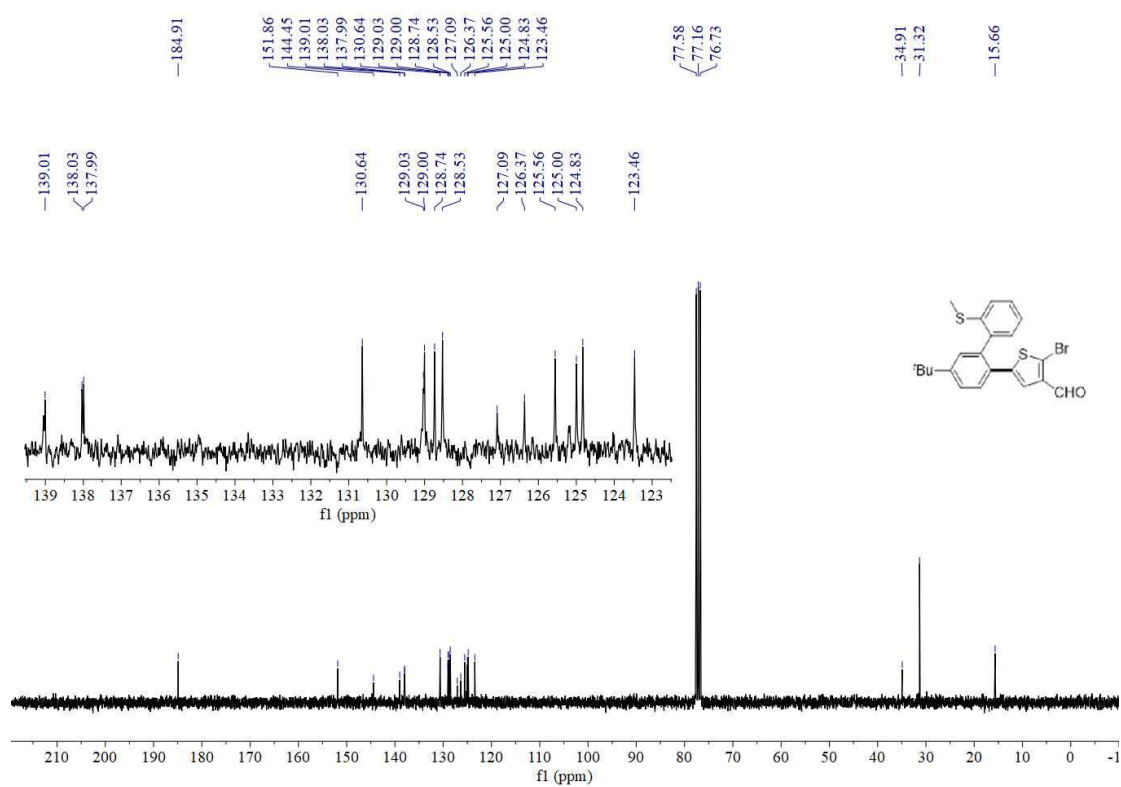

$^1\text{H}$  NMR spectrum of **3p** in  $\text{CDCl}_3$  (300 MHz)

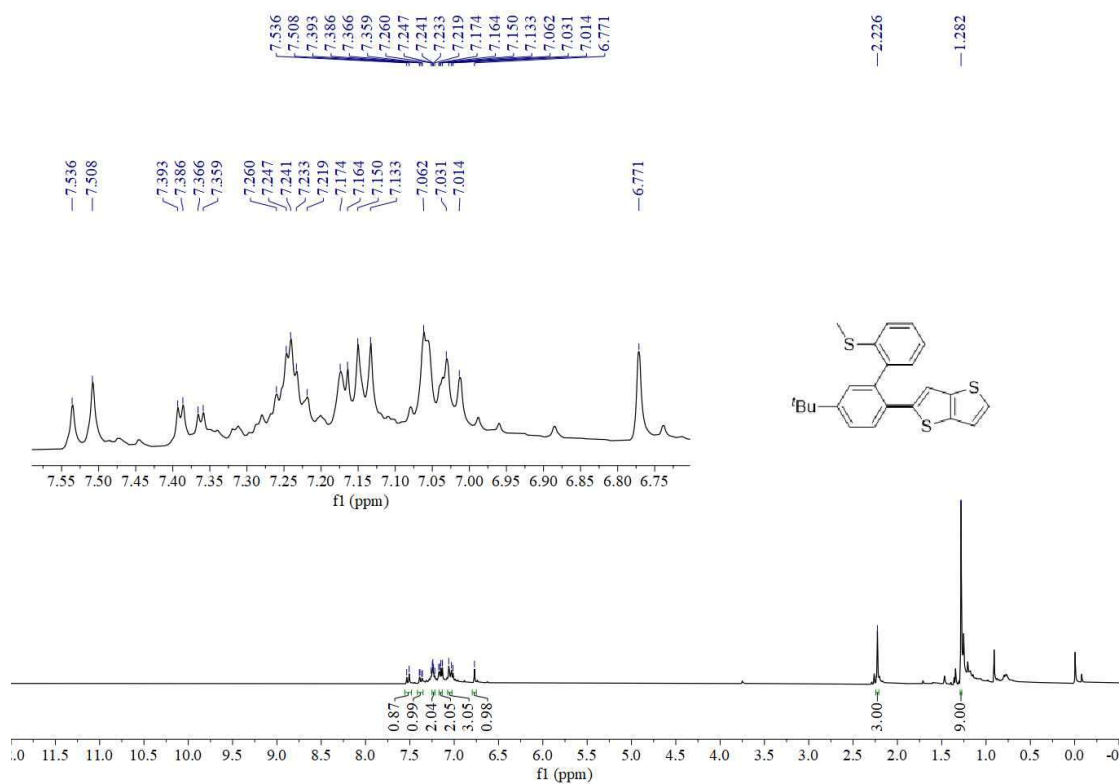

$^{13}\text{C}\{^1\text{H}\}$  NMR spectrum of **3p** in  $\text{CDCl}_3$  (75 MHz)

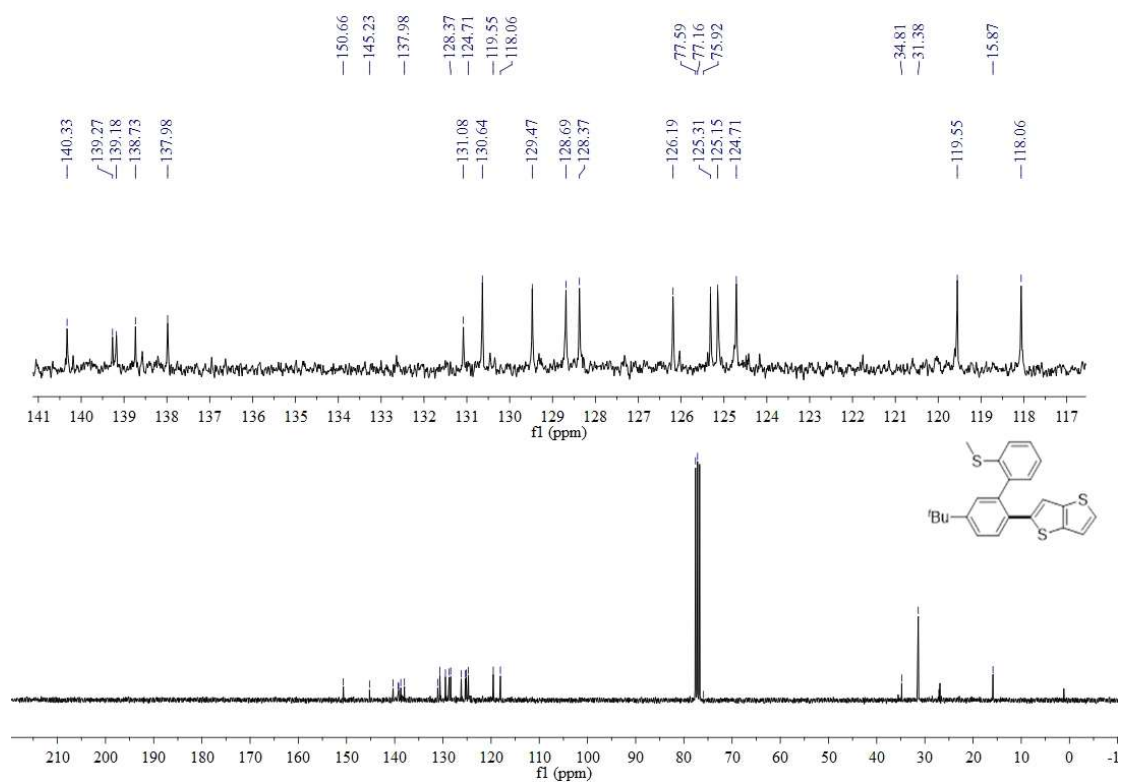

$^1\text{H}$  NMR spectrum of **3q** in  $\text{CDCl}_3$  (300 MHz)

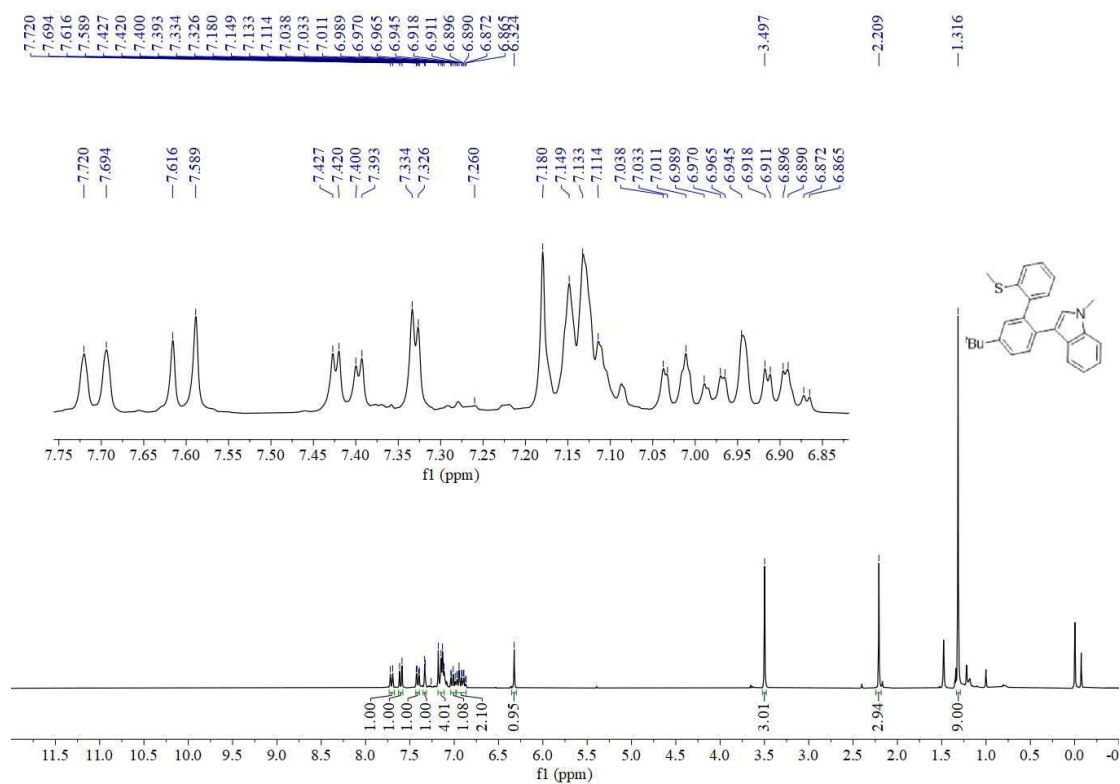

$^{13}\text{C}\{^1\text{H}\}$  NMR spectrum of **3q** in  $\text{CDCl}_3$  (75 MHz)

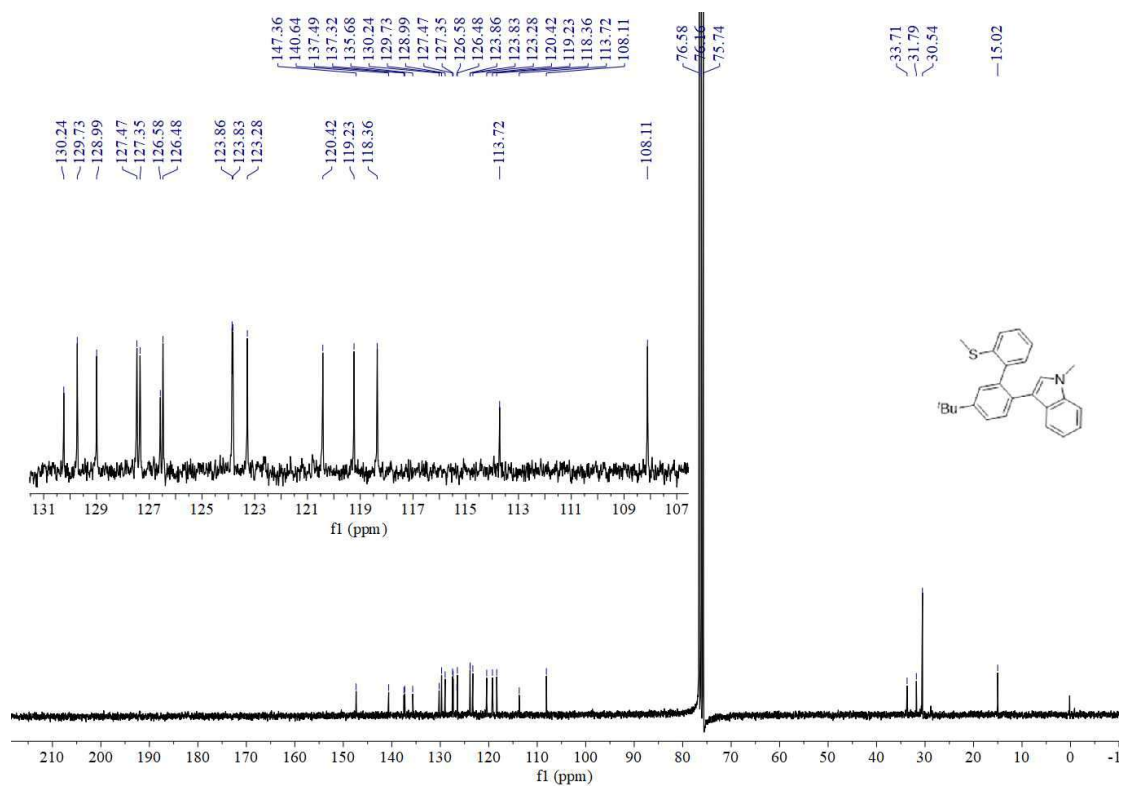

$^1\text{H}$  NMR spectrum of **4a** in  $\text{CDCl}_3$  (300 MHz)

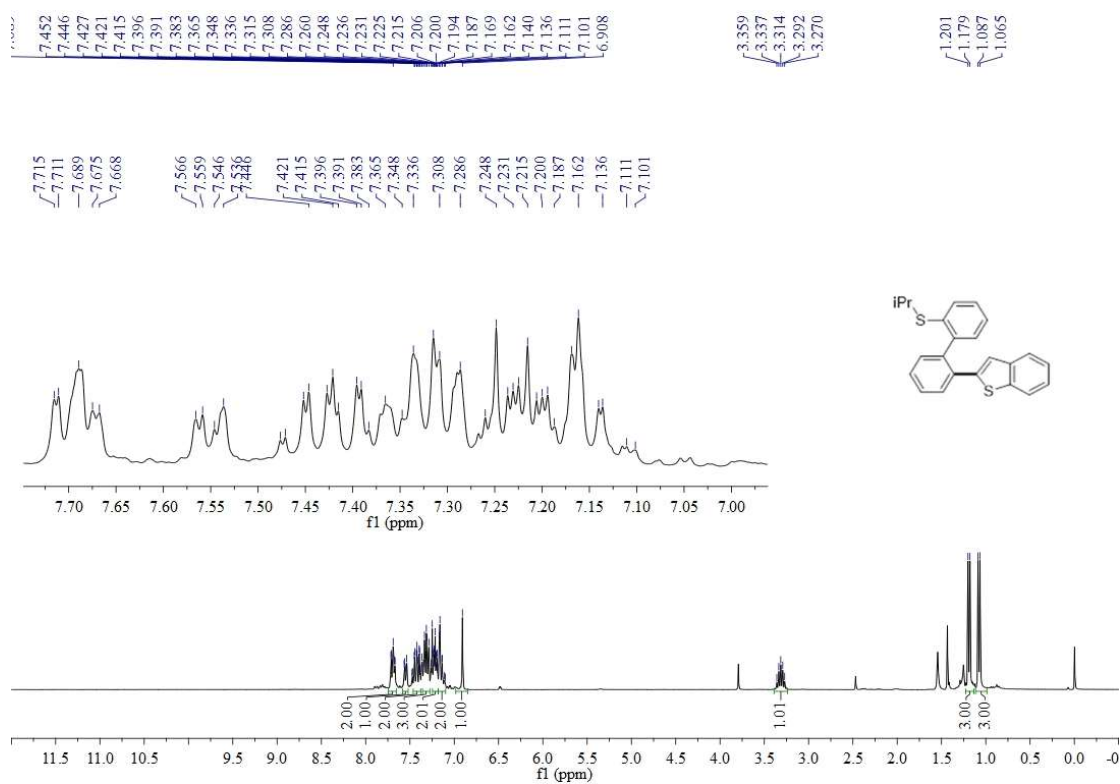

$^{13}\text{C}\{^1\text{H}\}$  NMR spectrum of **4a** in  $\text{CDCl}_3$  (75 MHz)

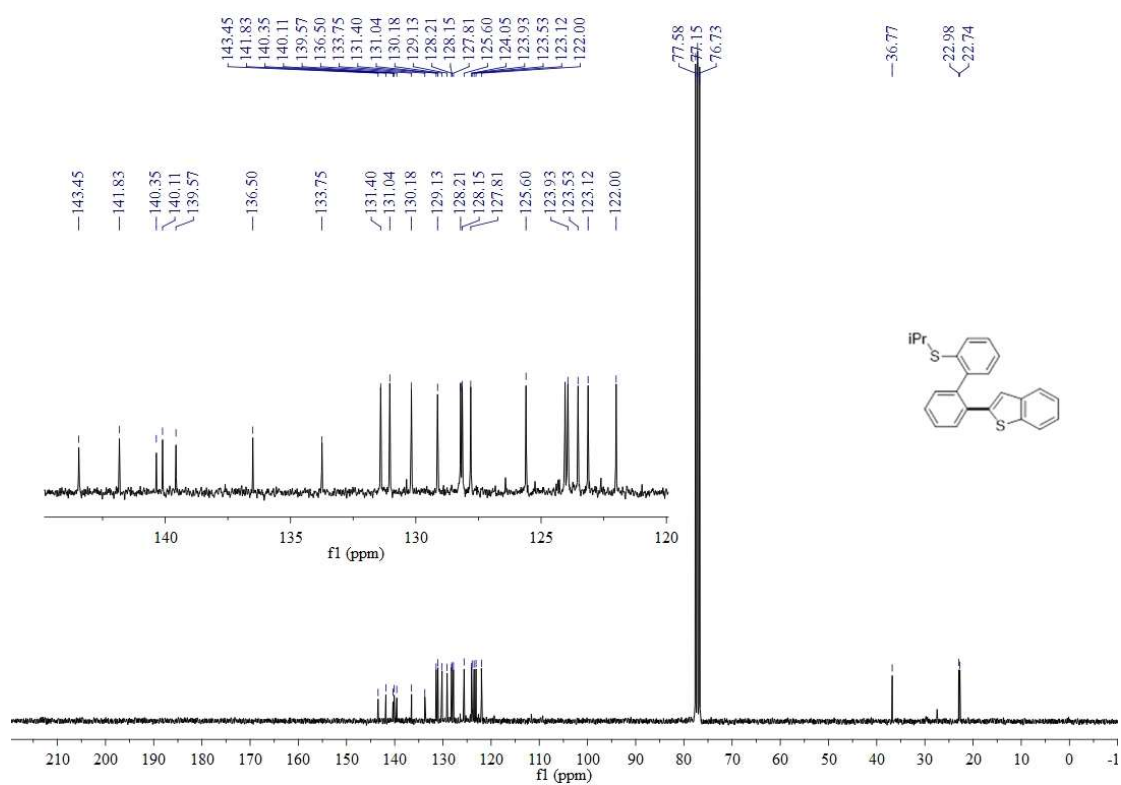



$^1\text{H}$  NMR spectrum of **4b** in  $\text{CDCl}_3$  (300 MHz)

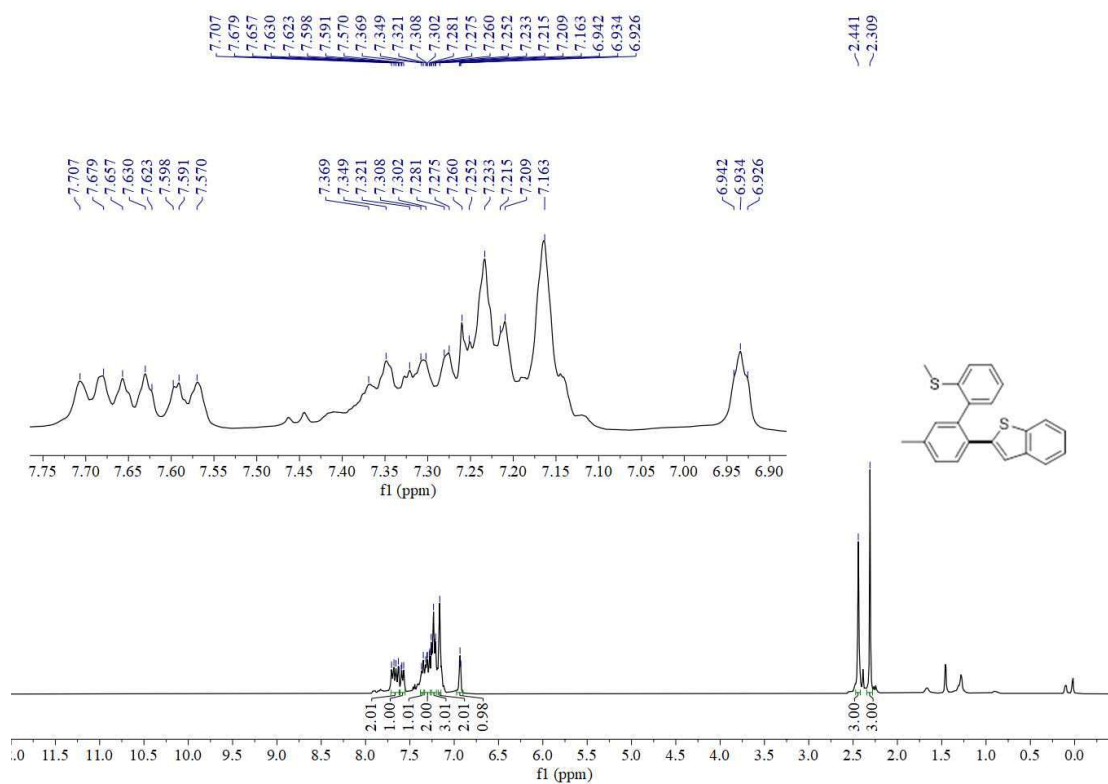

$^{13}\text{C}\{^1\text{H}\}$  NMR spectrum of **4b** in  $\text{CDCl}_3$  (75 MHz)

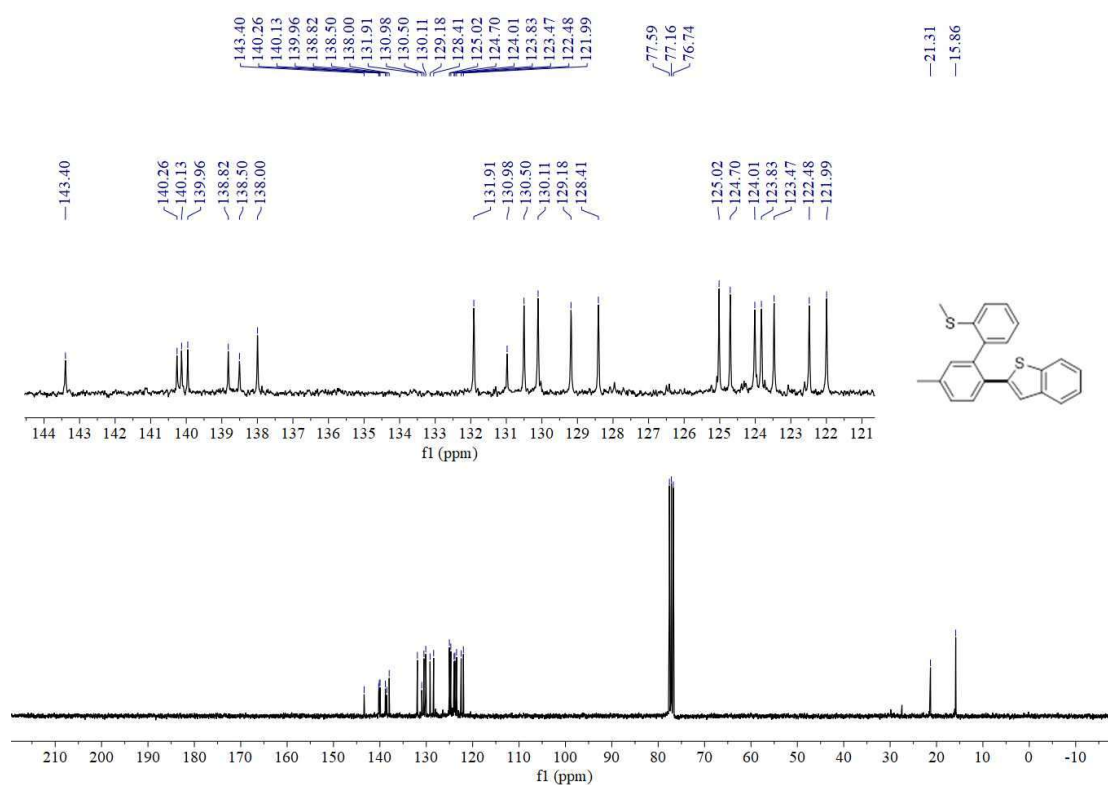

$^1\text{H}$  NMR spectrum of **4c** in  $\text{CDCl}_3$  (300 MHz)

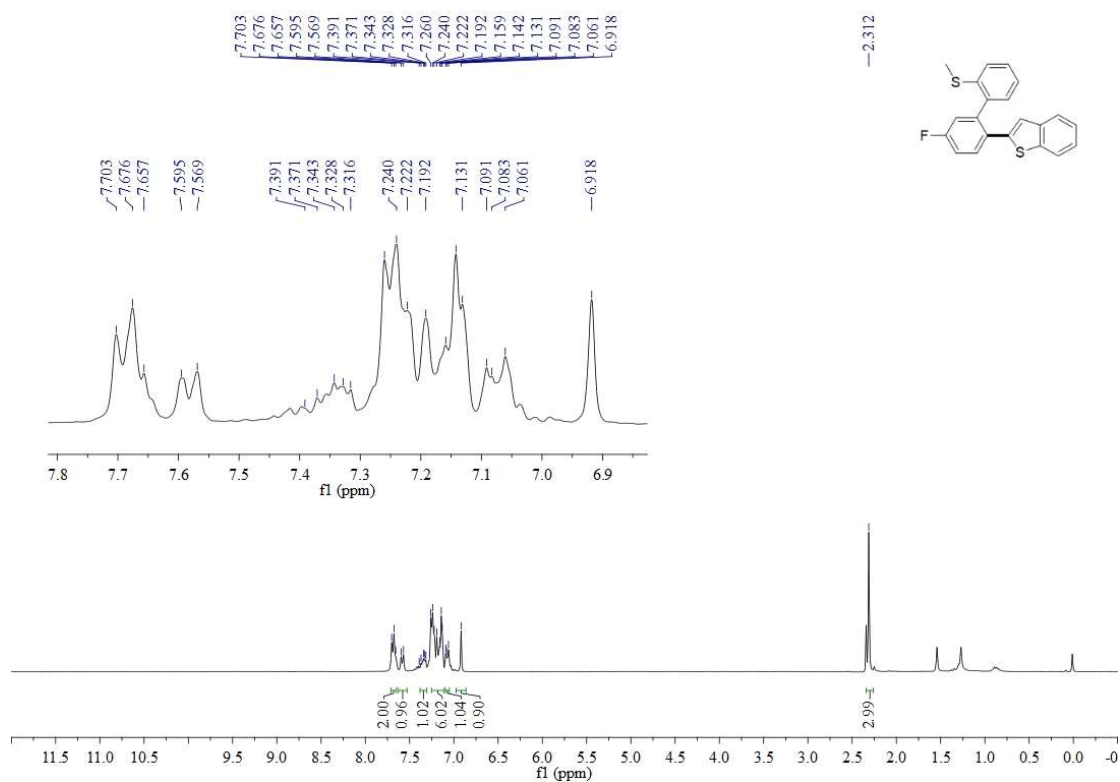

$^{13}\text{C}\{^1\text{H}\}$  NMR spectrum of **4c** in  $\text{CDCl}_3$  (75 MHz)

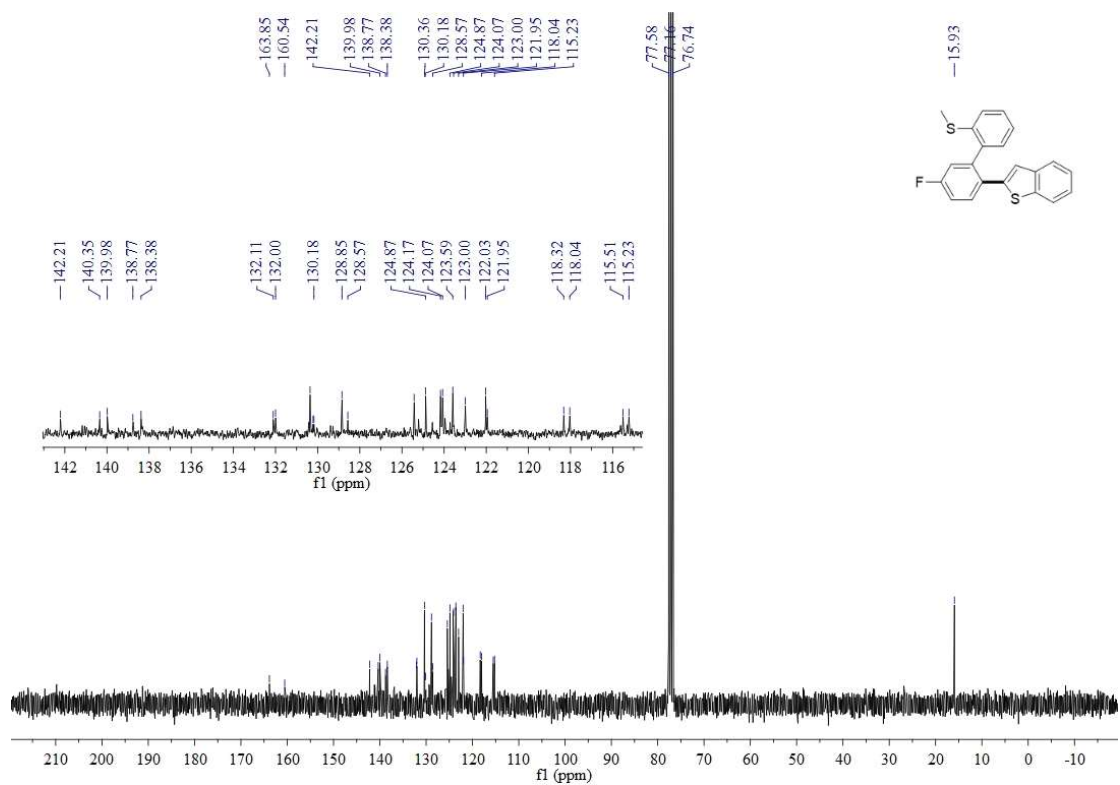



$^1\text{H}$  NMR spectrum of **4d** in  $\text{CDCl}_3$  (300 MHz)

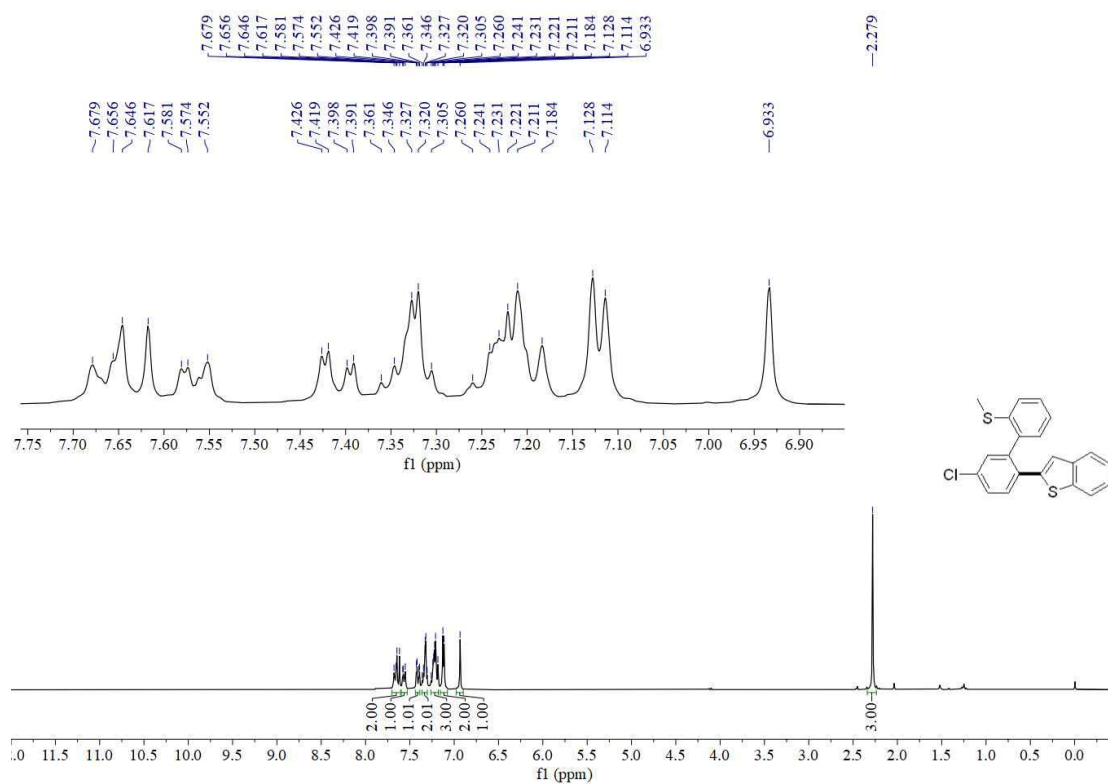

$^{13}\text{C}\{^1\text{H}\}$  NMR spectrum of **4d** in  $\text{CDCl}_3$  (75 MHz)

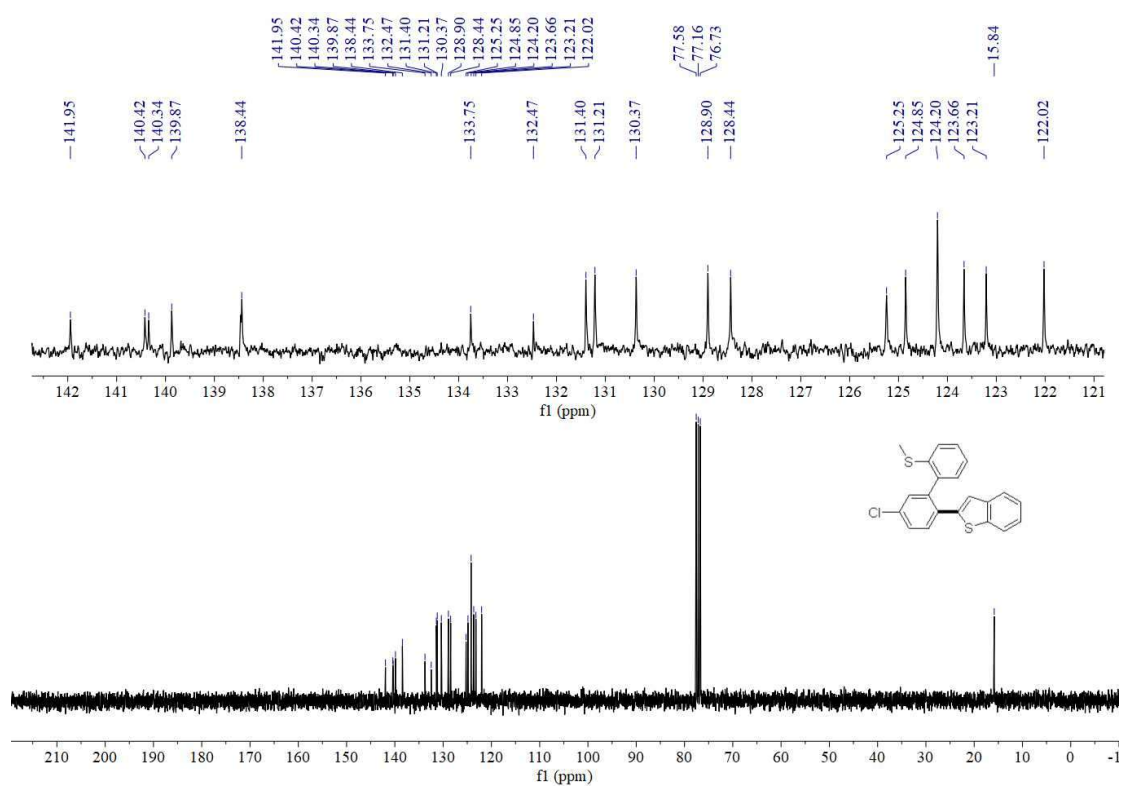

$^1\text{H}$  NMR spectrum of **4e** in  $\text{CDCl}_3$  (300 MHz)

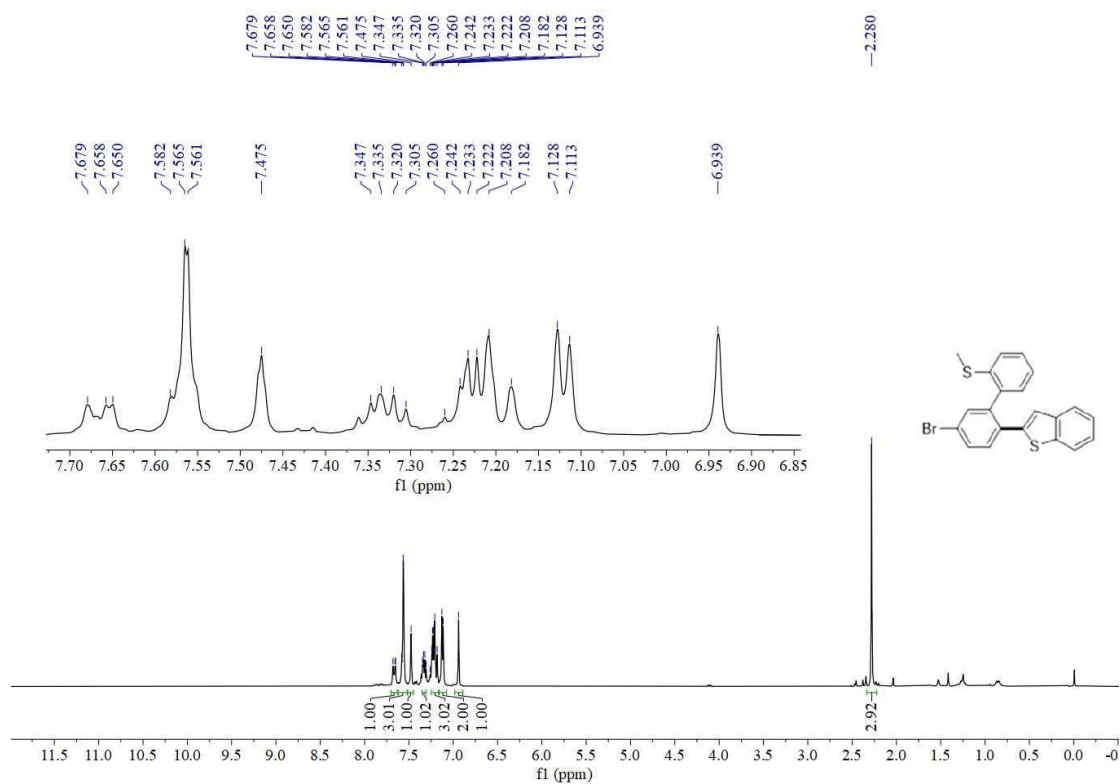

$^{13}\text{C}\{^1\text{H}\}$  NMR spectrum of **4e** in  $\text{CDCl}_3$  (75 MHz)

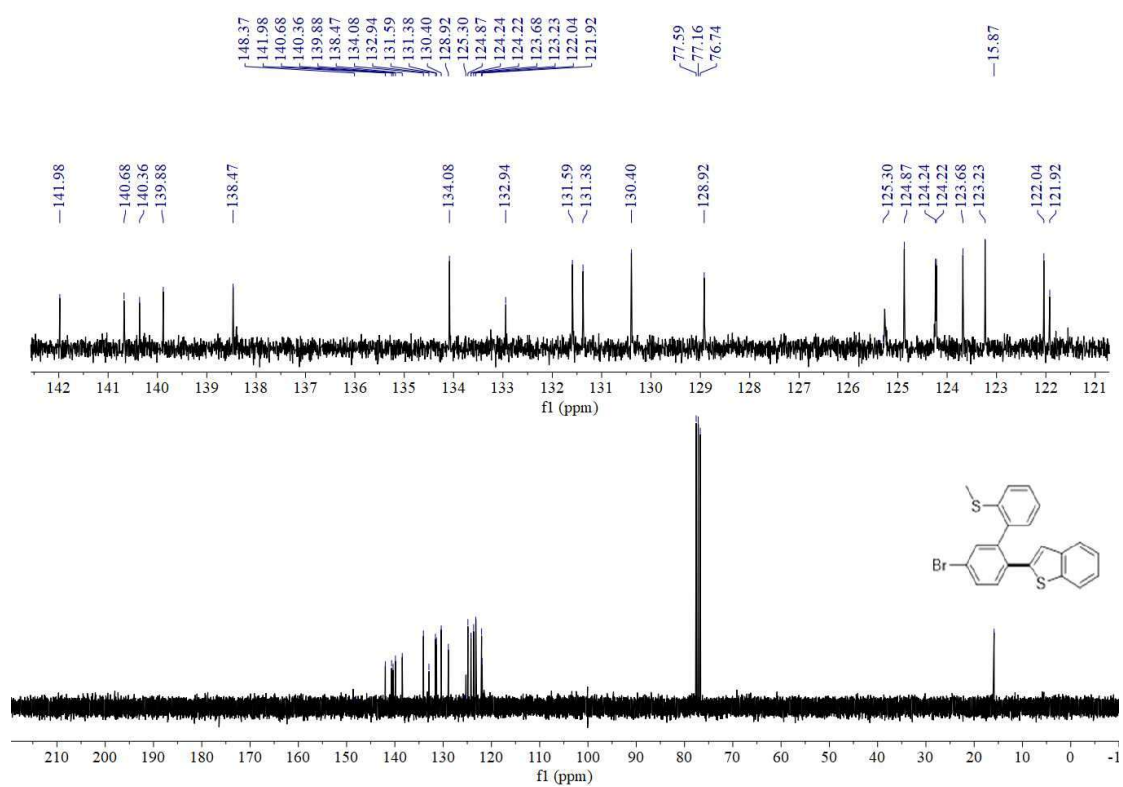

$^1\text{H}$  NMR spectrum of **4f** in  $\text{CDCl}_3$  (300 MHz)

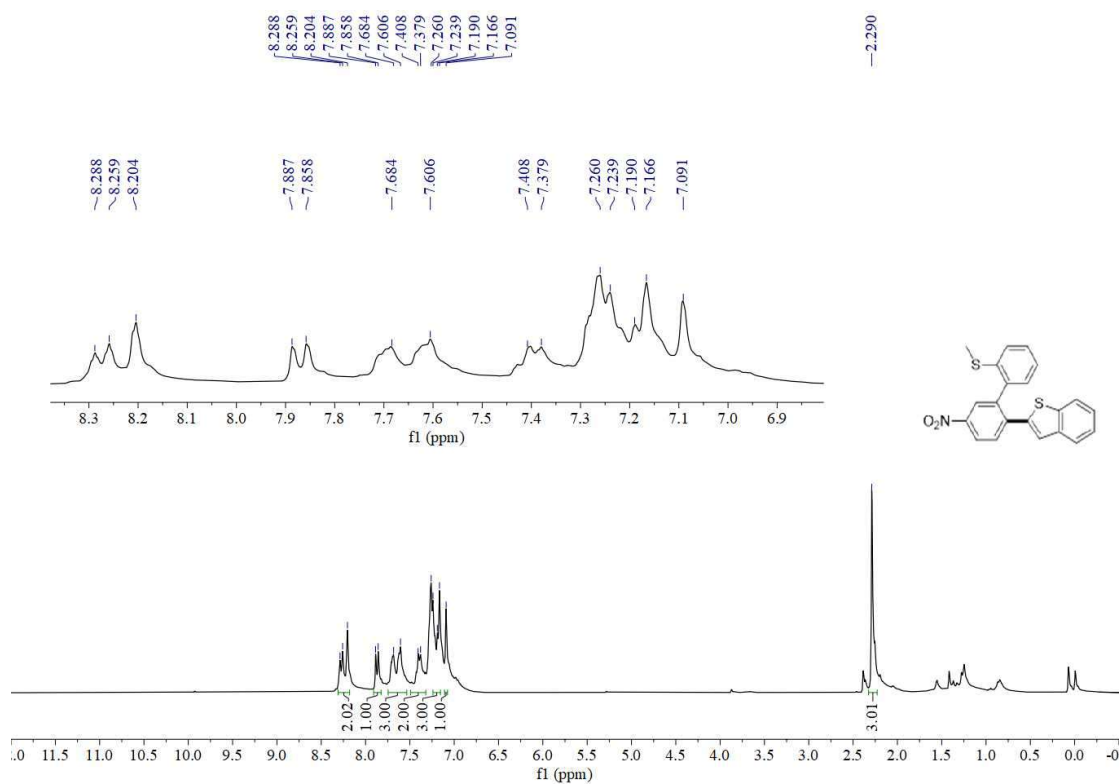

$^{13}\text{C}\{^1\text{H}\}$  NMR spectrum of **4f** in  $\text{CDCl}_3$  (75 MHz)

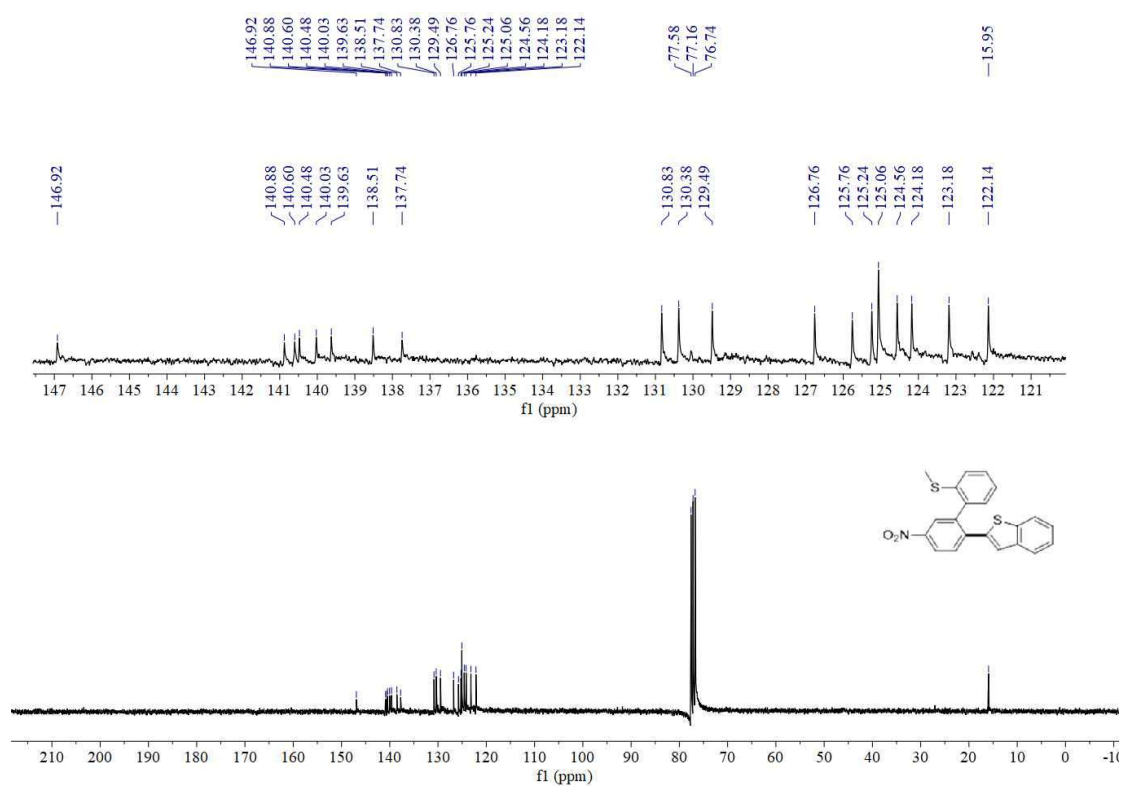

$^1\text{H}$  NMR spectrum of **4g** in  $\text{CDCl}_3$  (300 MHz)

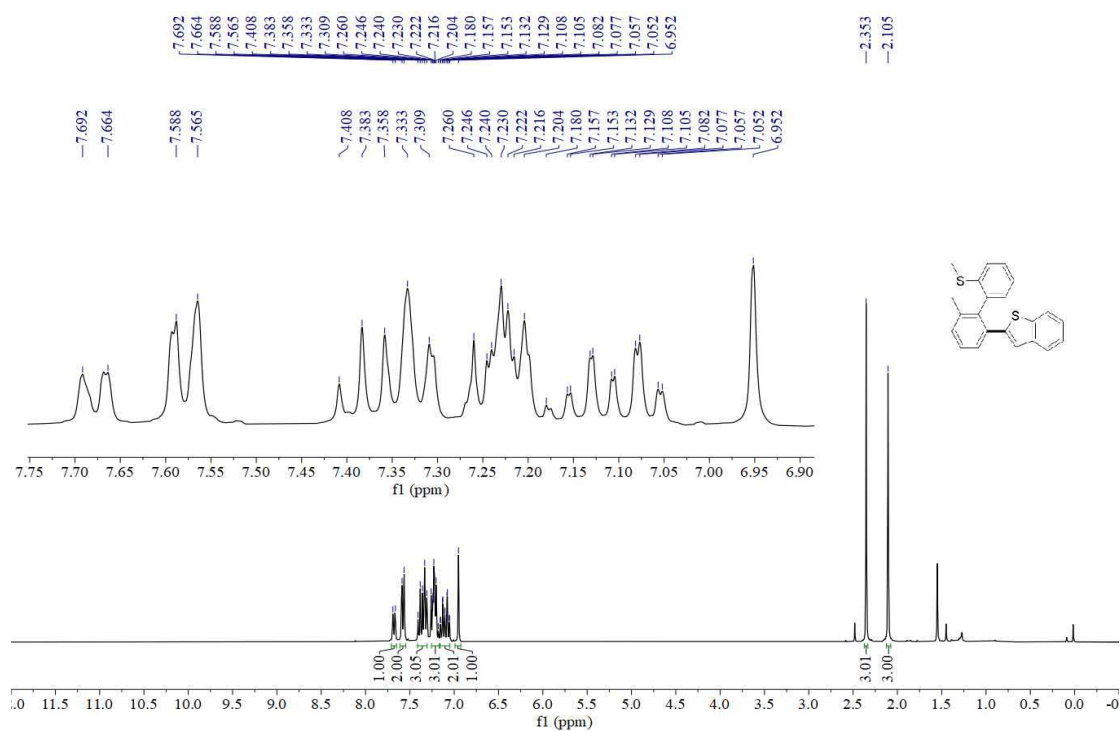

$^{13}\text{C}\{^1\text{H}\}$  NMR spectrum of **4g** in  $\text{CDCl}_3$  (75 MHz)

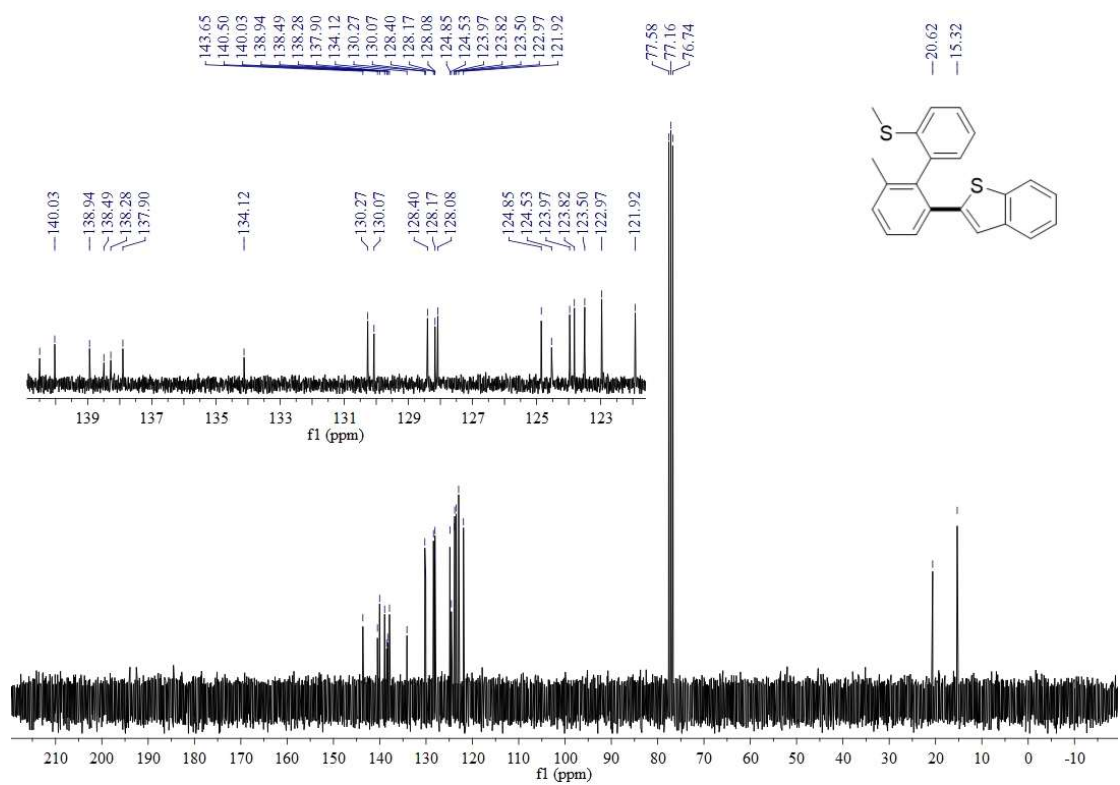

$^1\text{H}$  NMR spectrum of **4h** in  $\text{CDCl}_3$  (300 MHz)

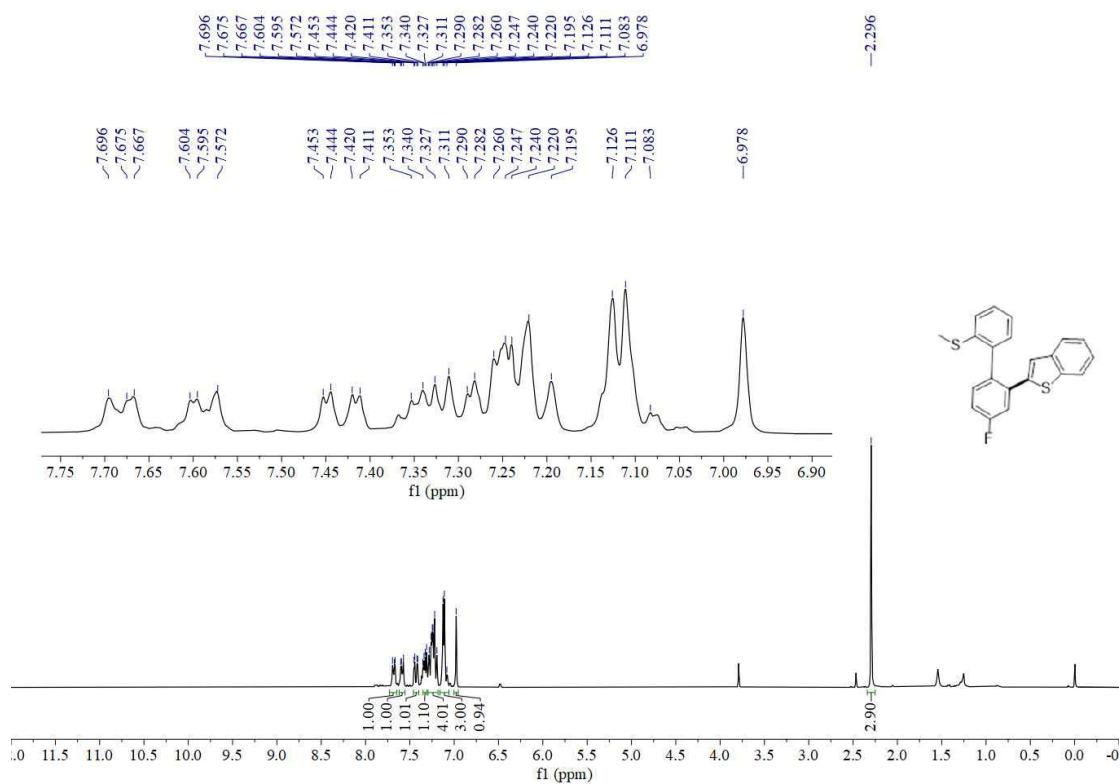

$^{13}\text{C}\{^1\text{H}\}$  NMR spectrum of **4h** in  $\text{CDCl}_3$  (75 MHz)

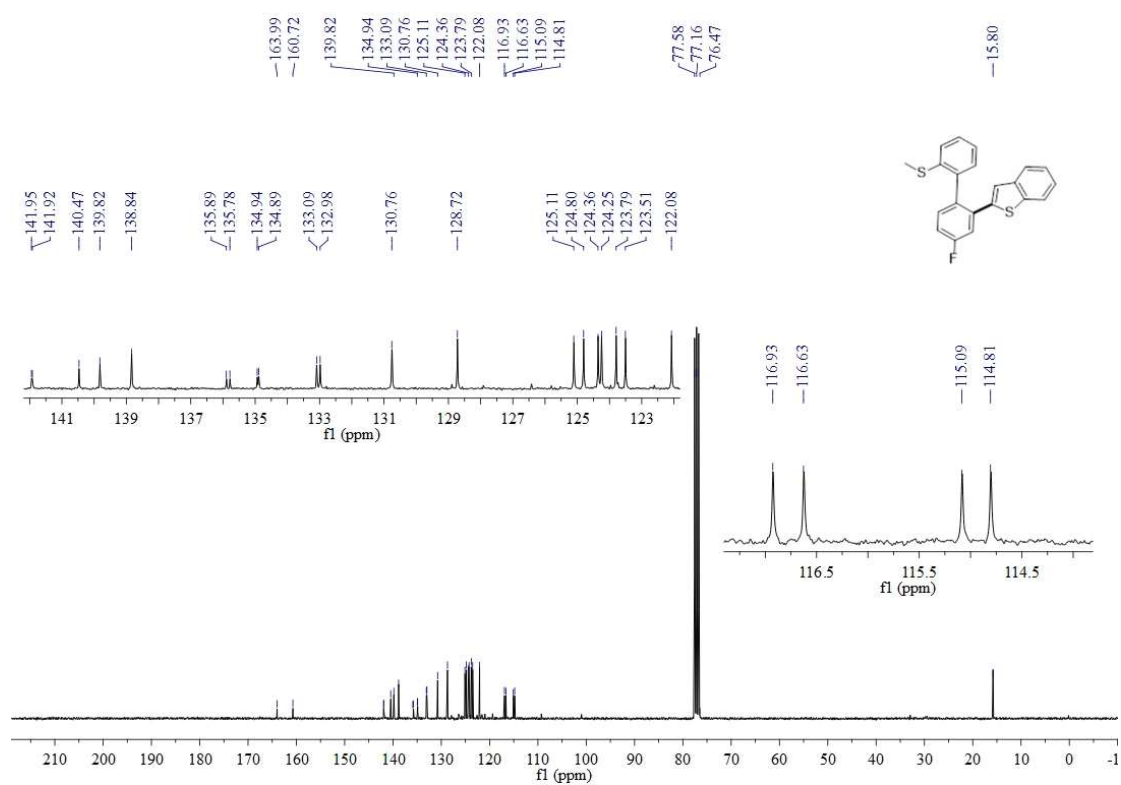

$^1\text{H}$  NMR spectrum of **4i** in  $\text{CDCl}_3$  (300 MHz)

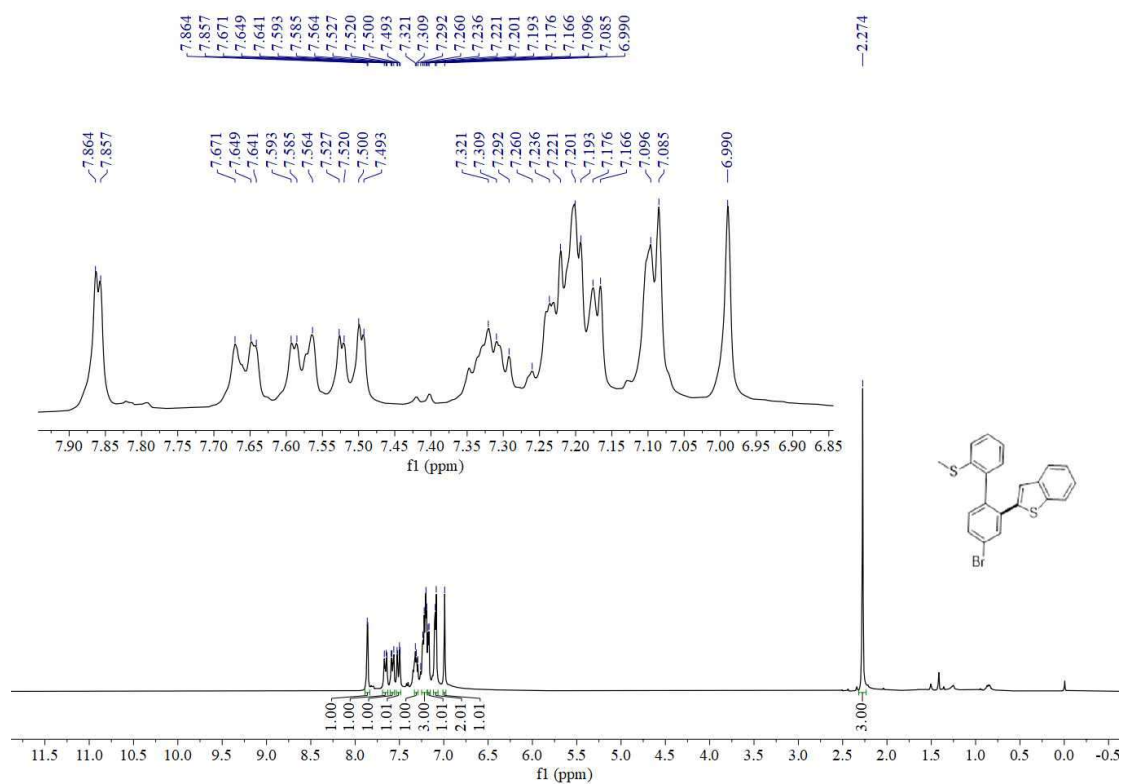

$^{13}\text{C}\{^1\text{H}\}$  NMR spectrum of **4i** in  $\text{CDCl}_3$  (75 MHz)

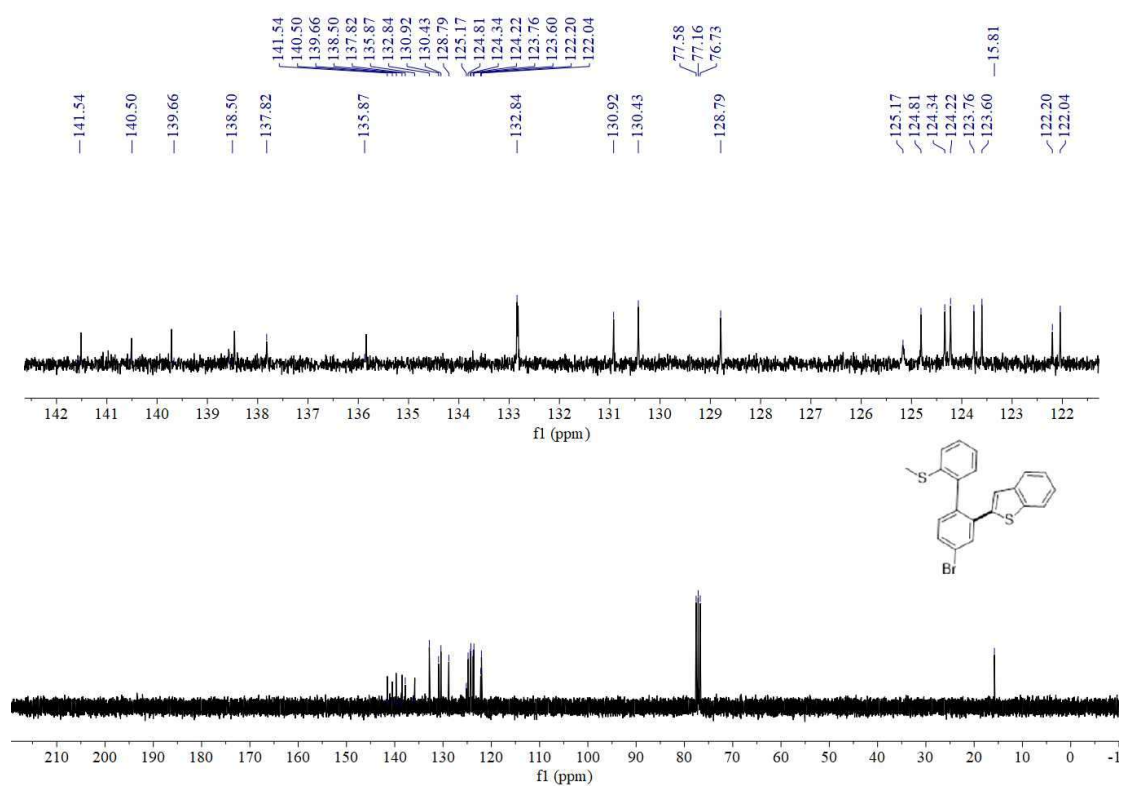



$^1\text{H}$  NMR spectrum of **4j** in  $\text{CDCl}_3$  (300 MHz)

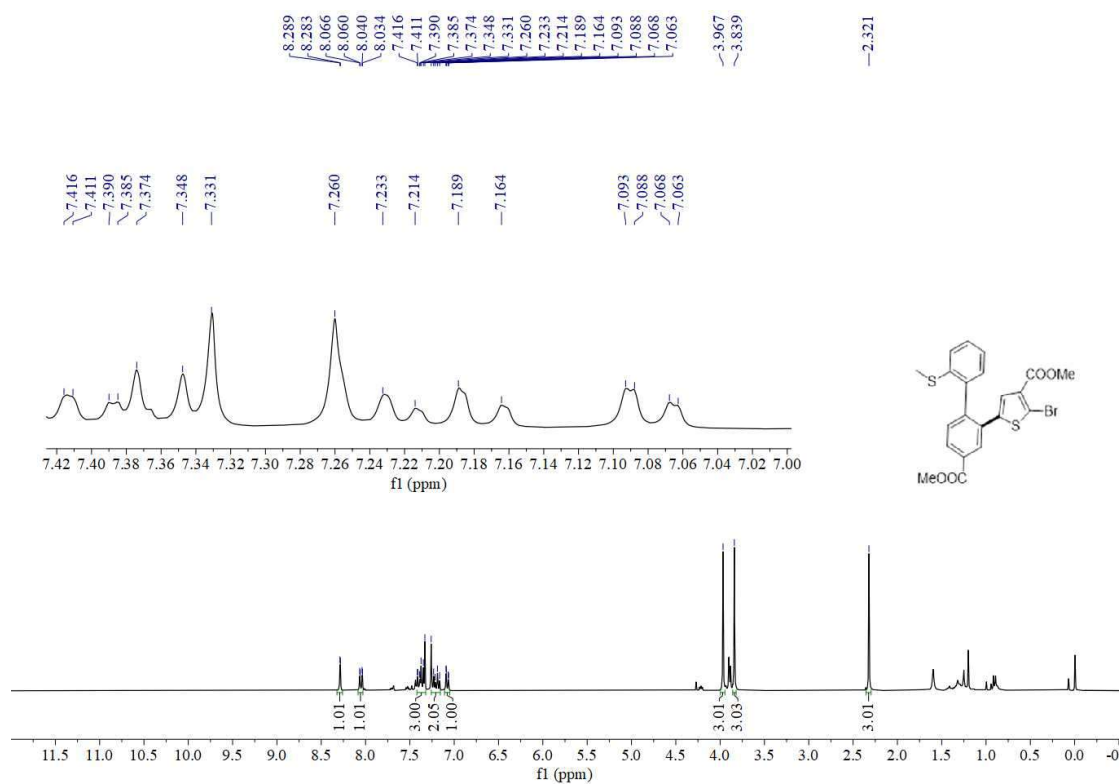

$^{13}\text{C}\{^1\text{H}\}$  NMR spectrum of **4j** in  $\text{CDCl}_3$  (75 MHz)

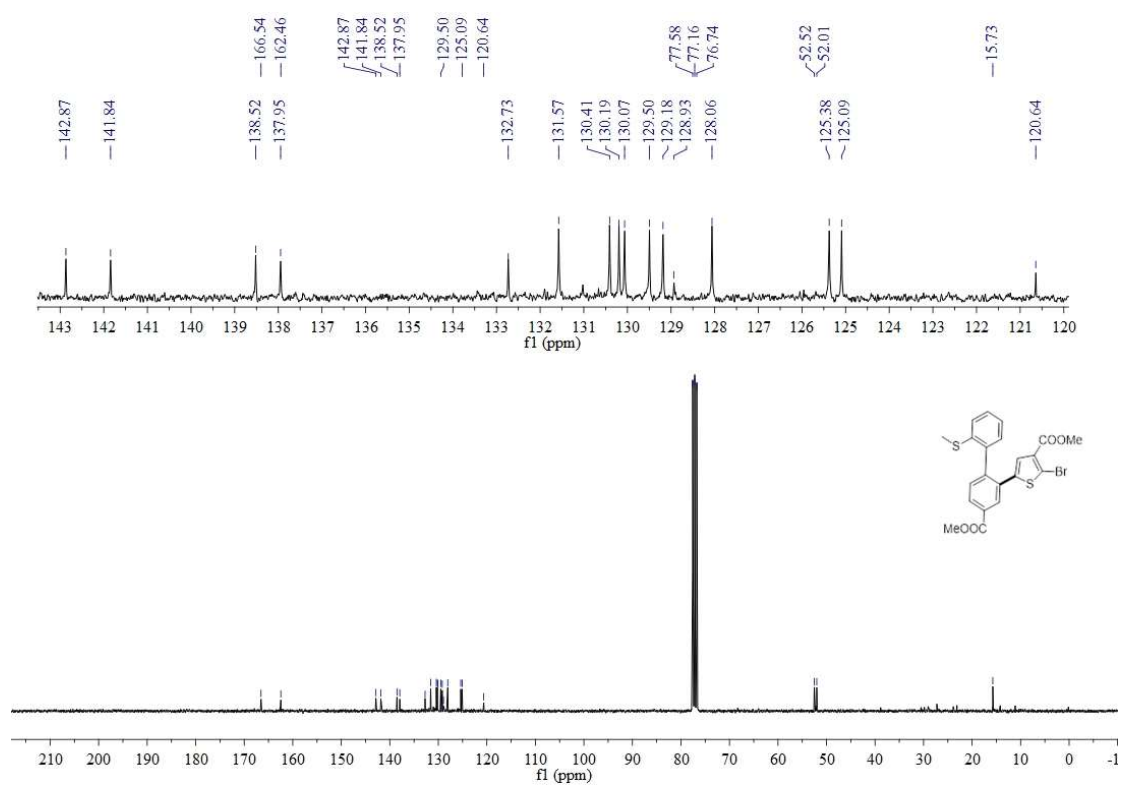

$^1\text{H}$  NMR spectrum of **4k** in  $\text{CDCl}_3$  (300 MHz)

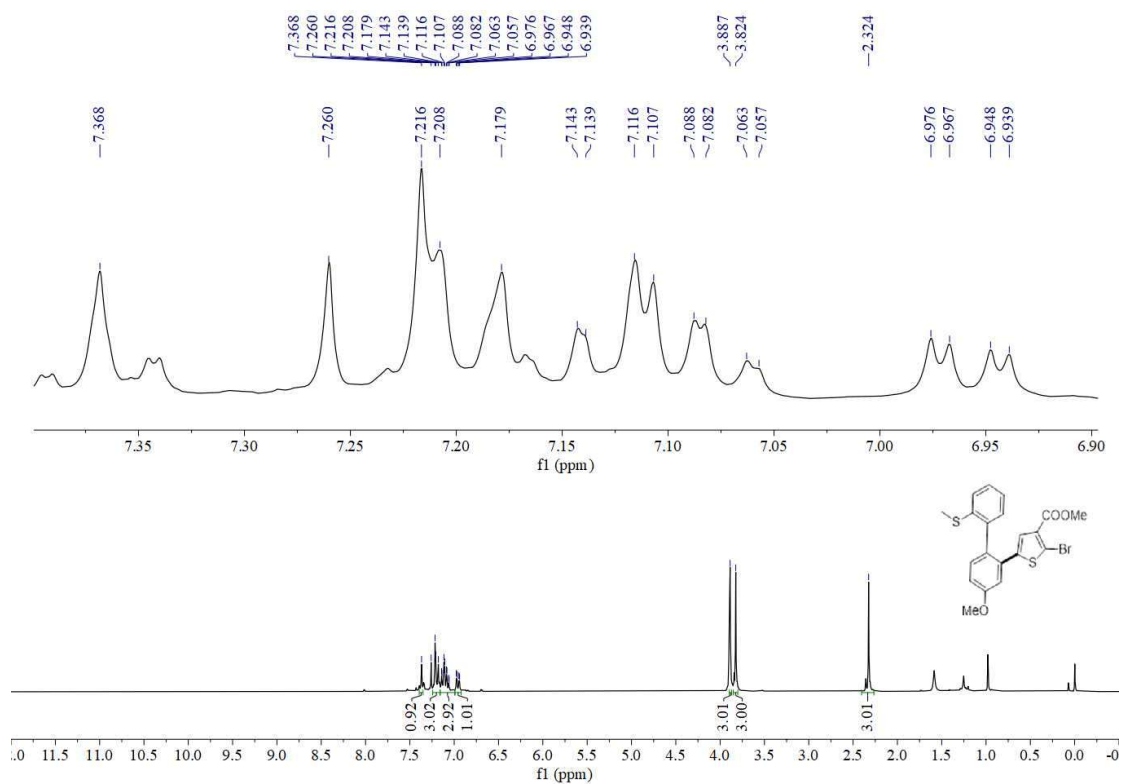

$^{13}\text{C}\{^1\text{H}\}$  NMR spectrum of **4k** in  $\text{CDCl}_3$  (75 MHz)

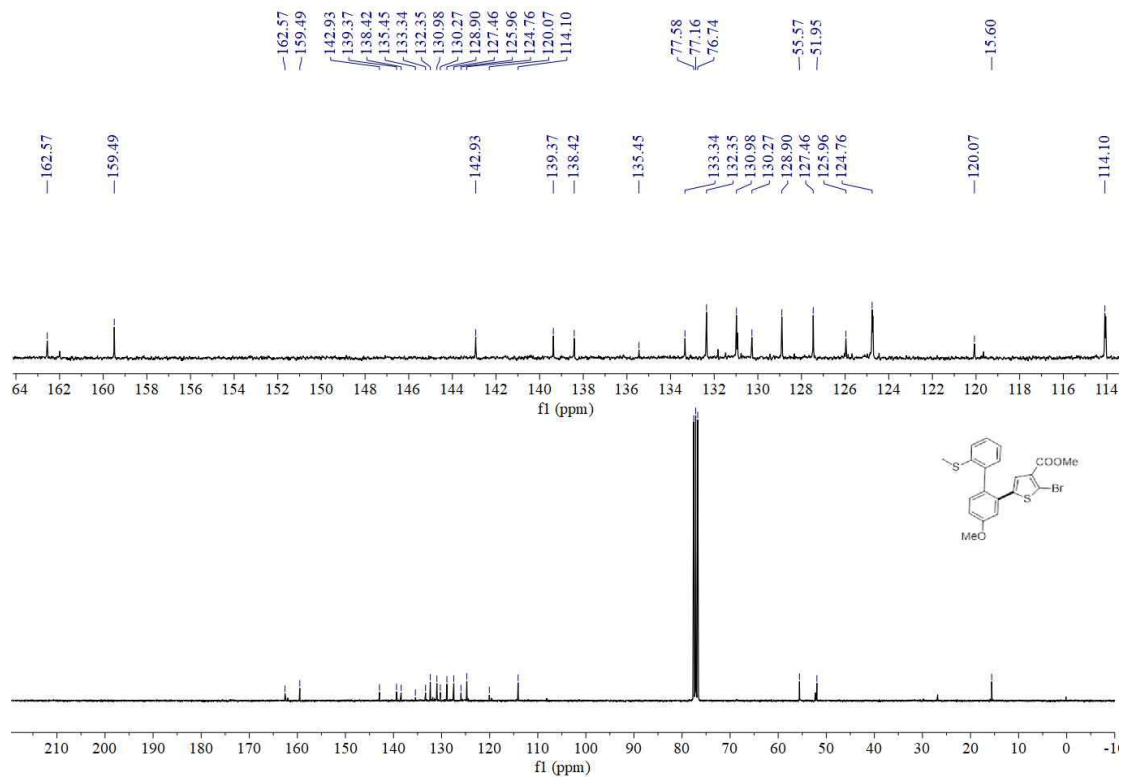



$^1\text{H}$  NMR spectrum of **4k'** in  $\text{CDCl}_3$  (300 MHz)

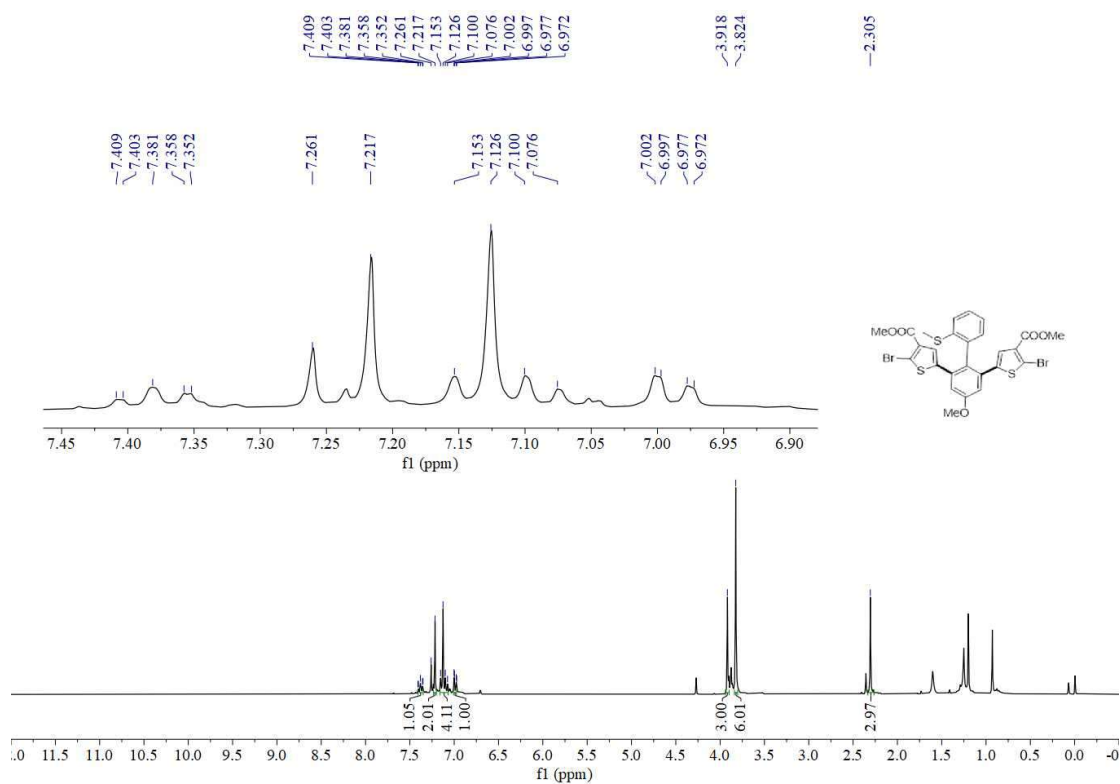

$^{13}\text{C}\{^1\text{H}\}$  NMR spectrum of **4k'** in  $\text{CDCl}_3$  (75 MHz)

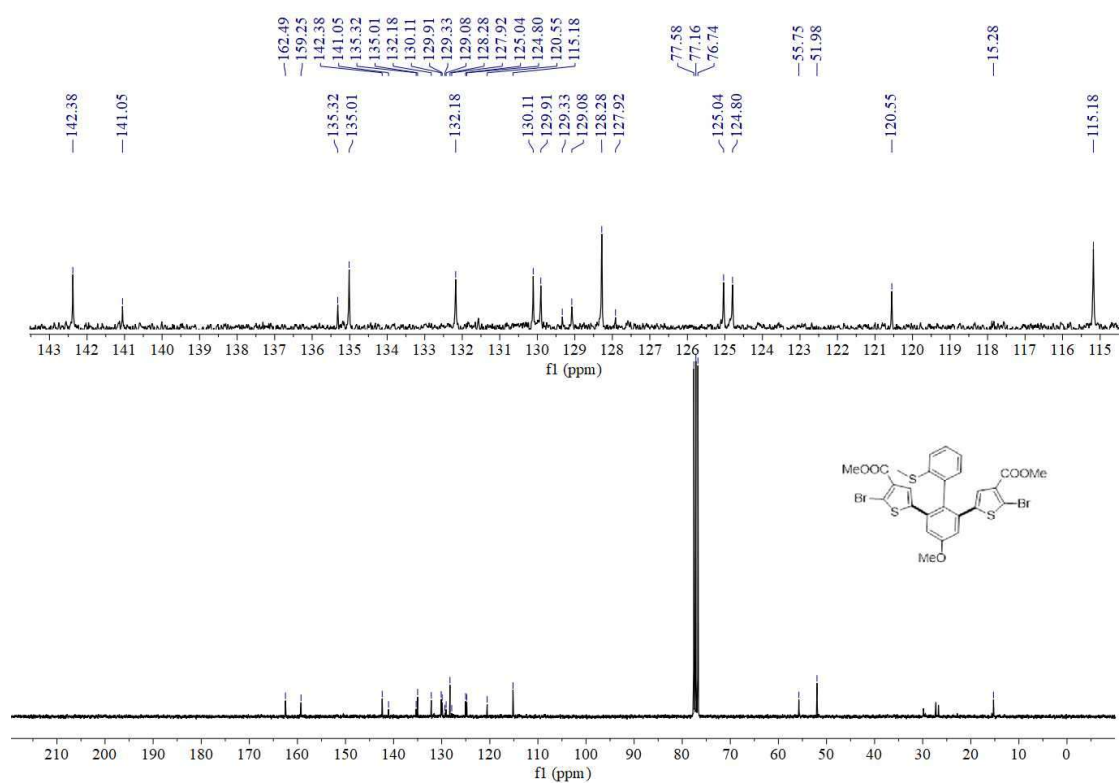

$^1\text{H}$  NMR spectrum of **4l** in  $\text{CDCl}_3$  (300 MHz)

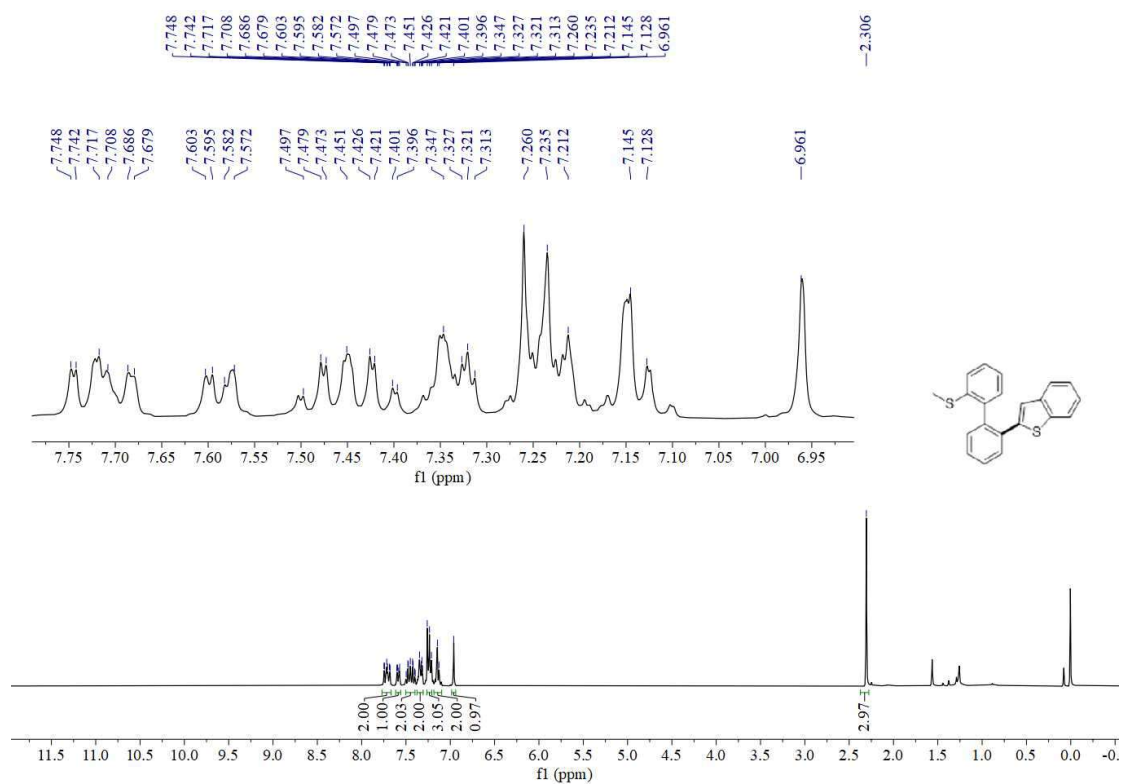

$^{13}\text{C}\{^1\text{H}\}$  NMR spectrum of **4l** in  $\text{CDCl}_3$  (75 MHz)

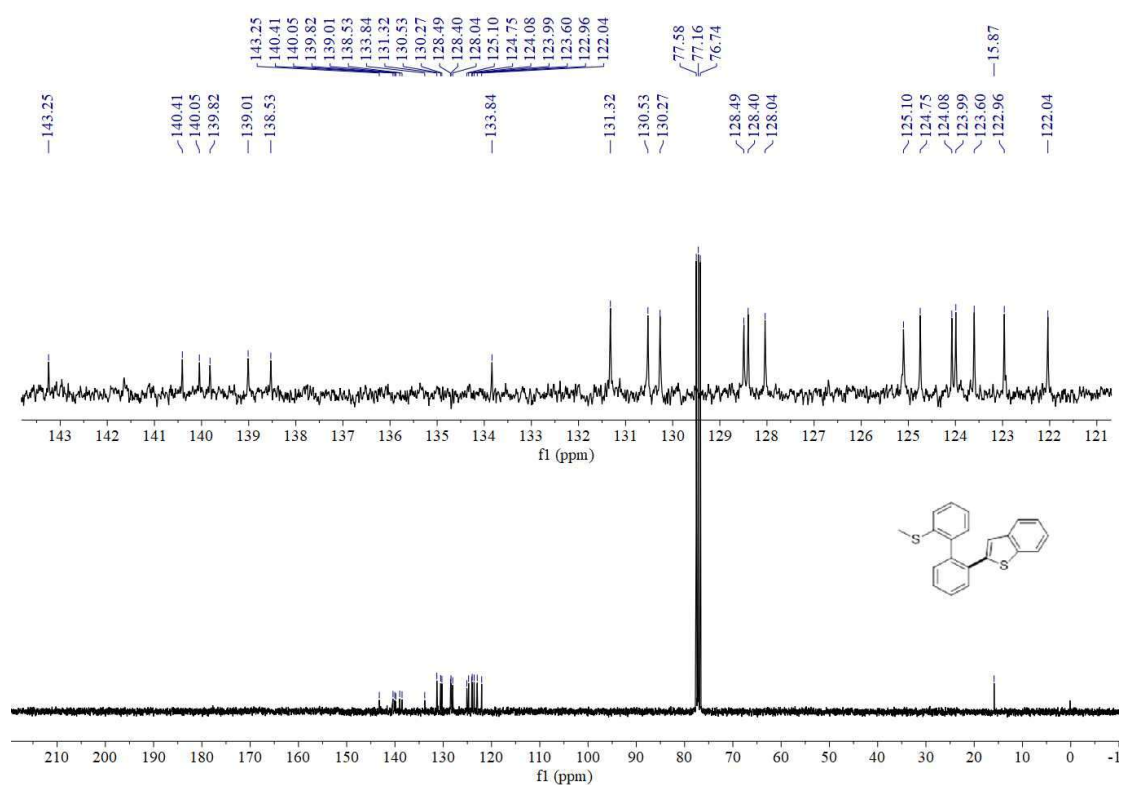

$^1\text{H}$  NMR spectrum of **4l'** in  $\text{CDCl}_3$  (300 MHz)

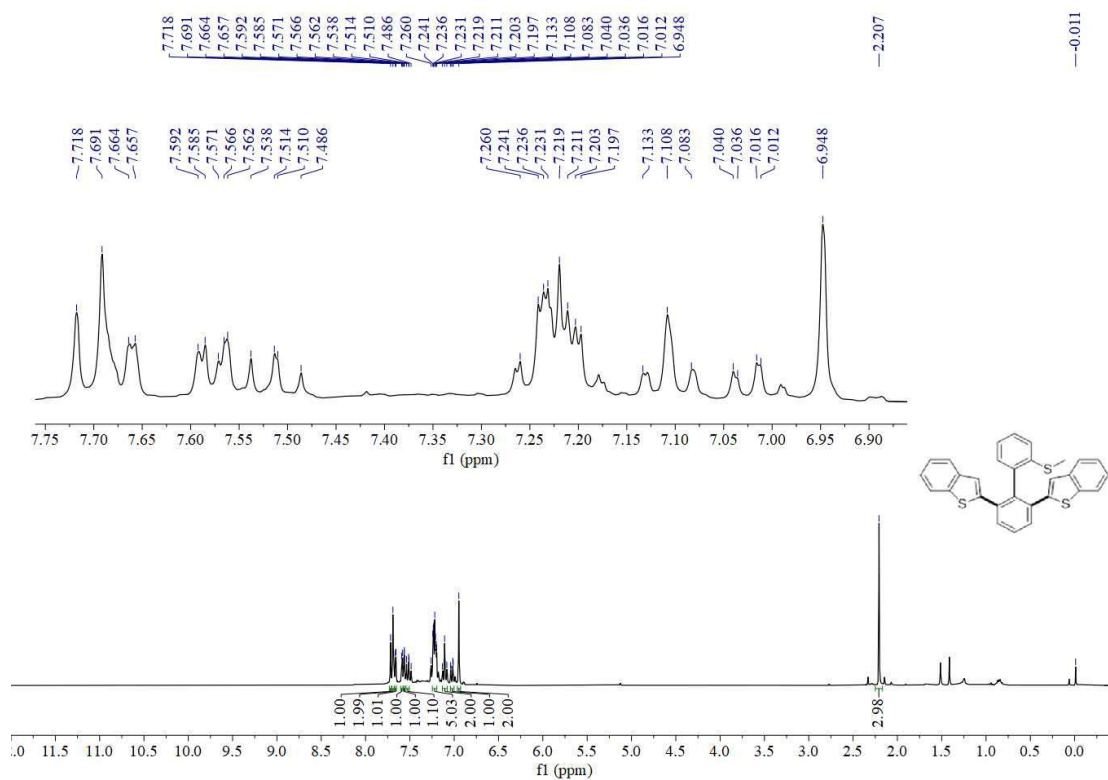

$^{13}\text{C}\{^1\text{H}\}$  NMR spectrum of **4l'** in  $\text{CDCl}_3$  (75 MHz)

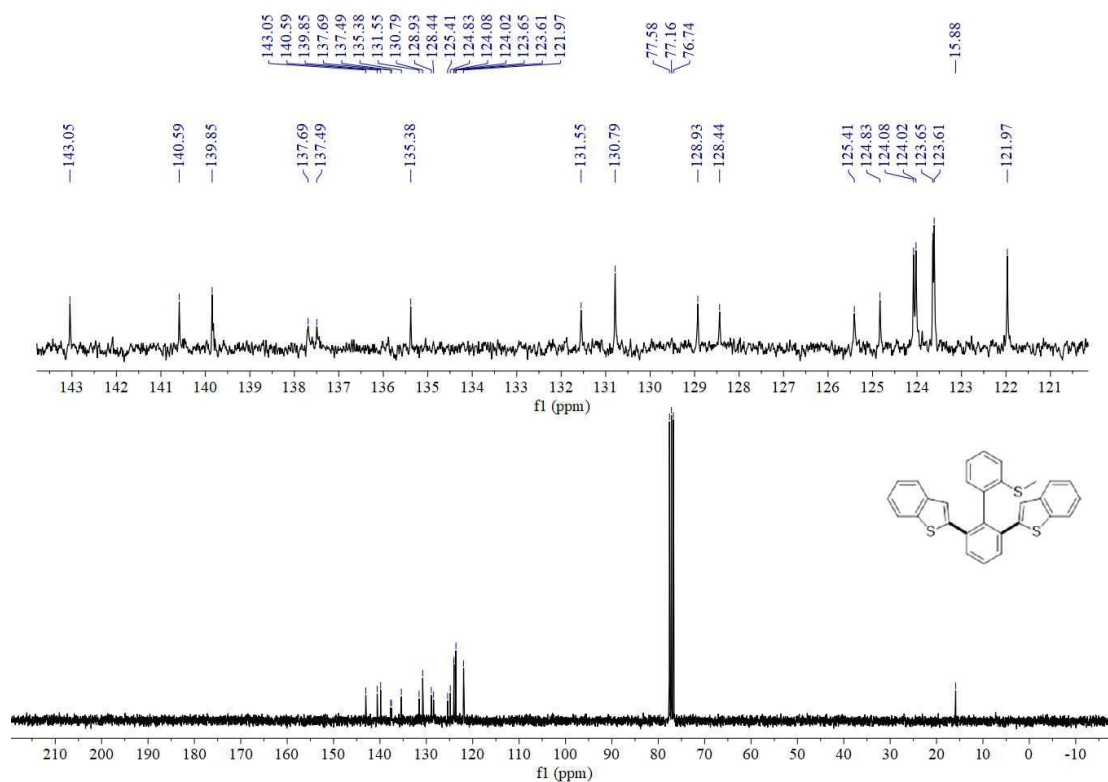

$^1\text{H}$  NMR spectrum of **4m** in  $\text{CDCl}_3$  (300 MHz)

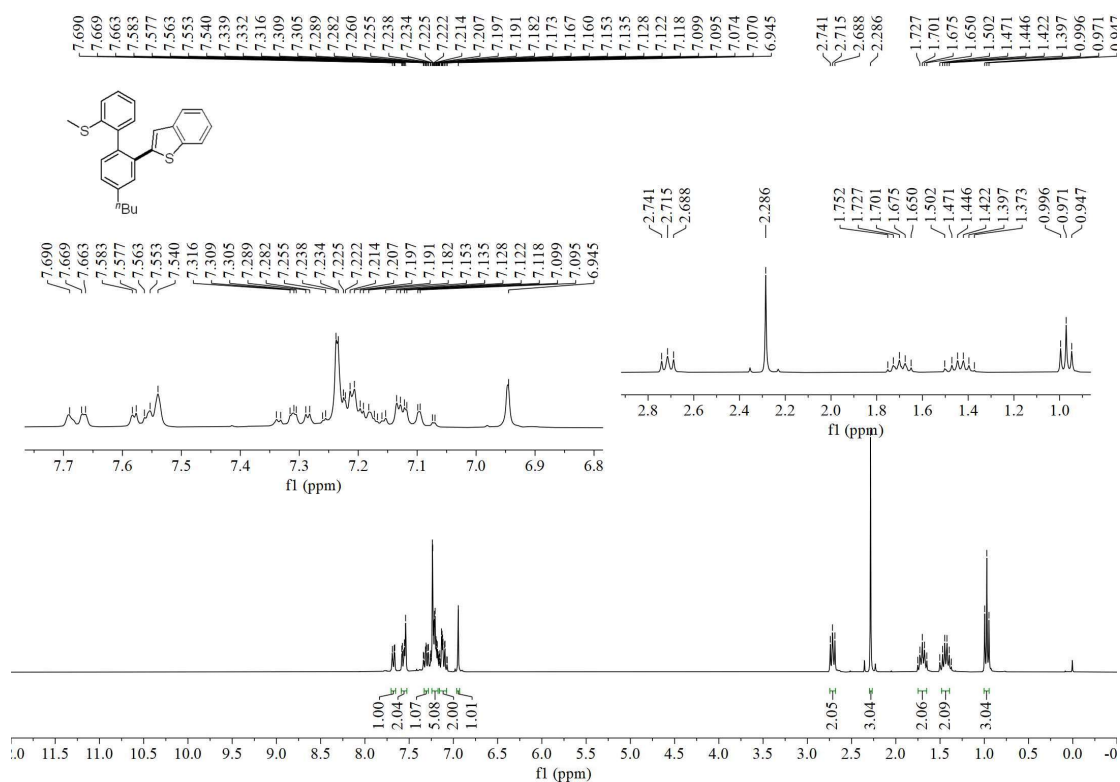

$^{13}\text{C}\{^1\text{H}\}$  NMR spectrum of **4m** in  $\text{CDCl}_3$  (75 MHz)

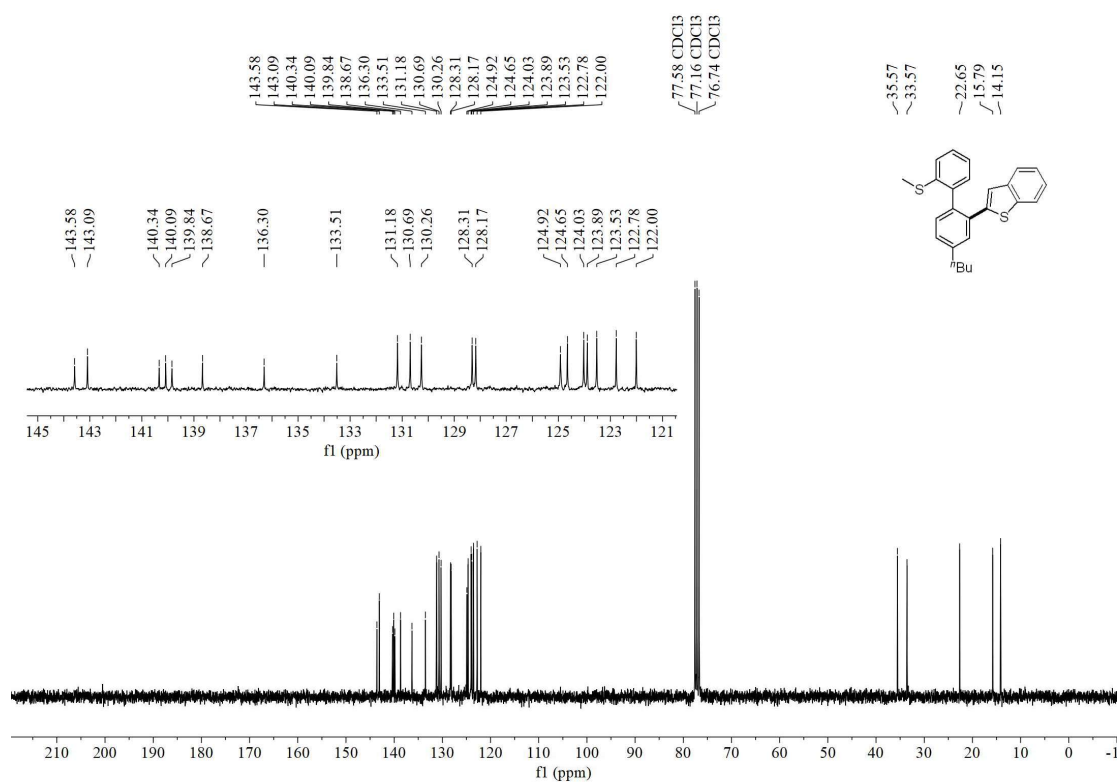

$^1\text{H}$  NMR spectrum of **4m'** in  $\text{CDCl}_3$  (300 MHz)

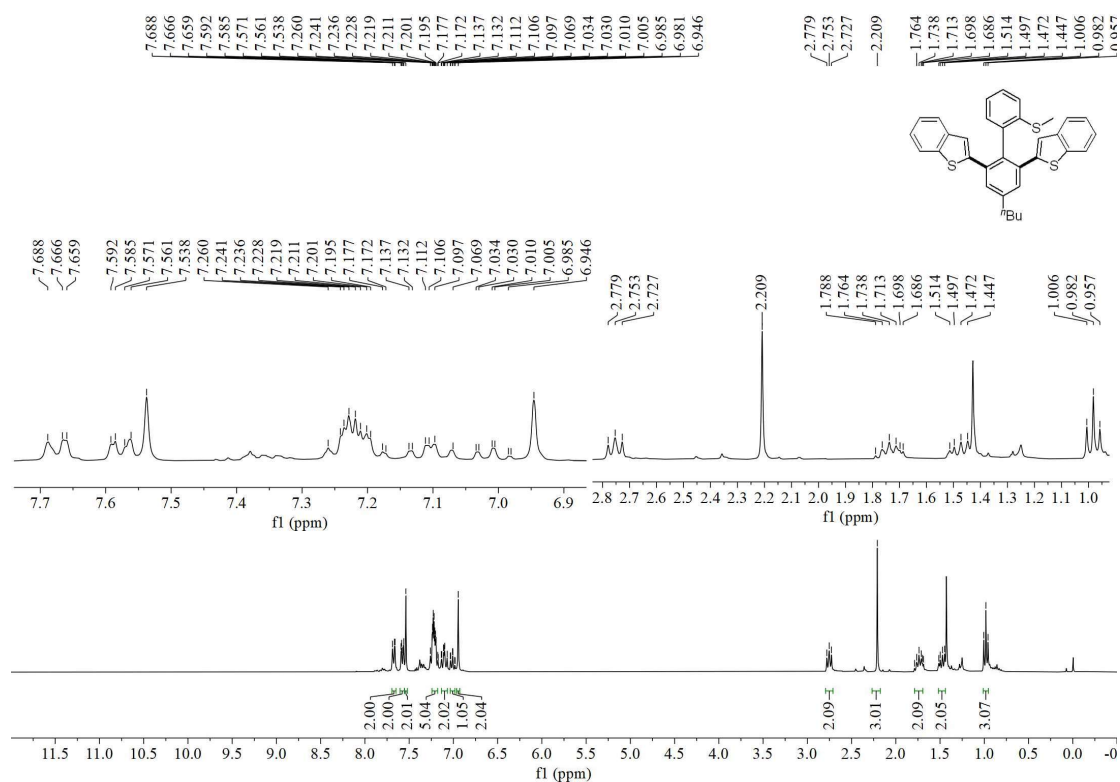

$^{13}\text{C}\{^1\text{H}\}$  NMR spectrum of **4m'** in  $\text{CDCl}_3$  (75 MHz)

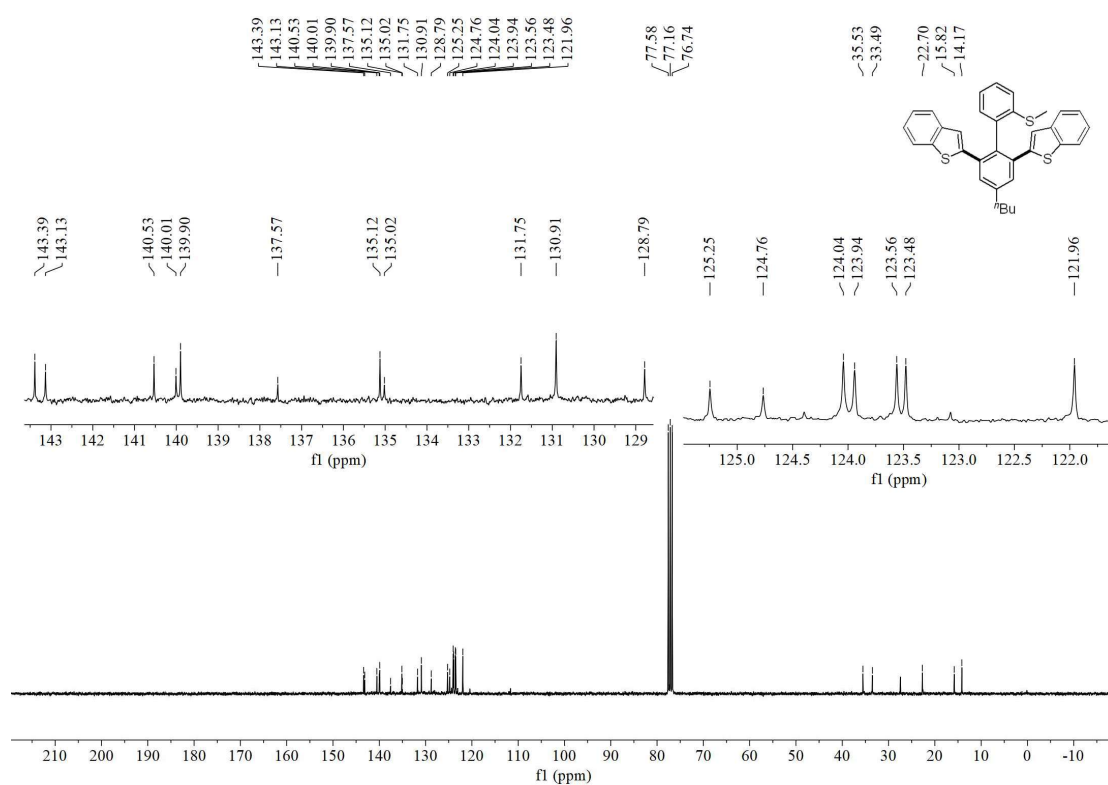

$^1\text{H}$  NMR spectrum of **4n** in  $\text{CDCl}_3$  (300 MHz)

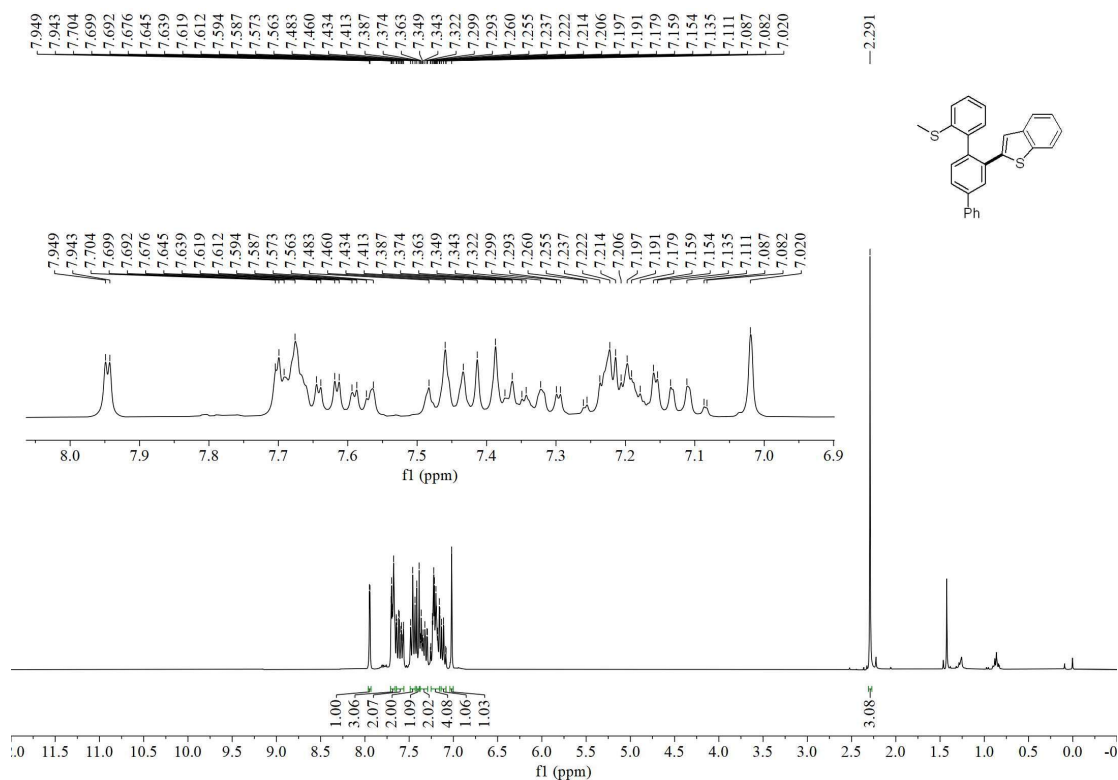

$^{13}\text{C}\{^1\text{H}\}$  NMR spectrum of **4n** in  $\text{CDCl}_3$  (75 MHz)

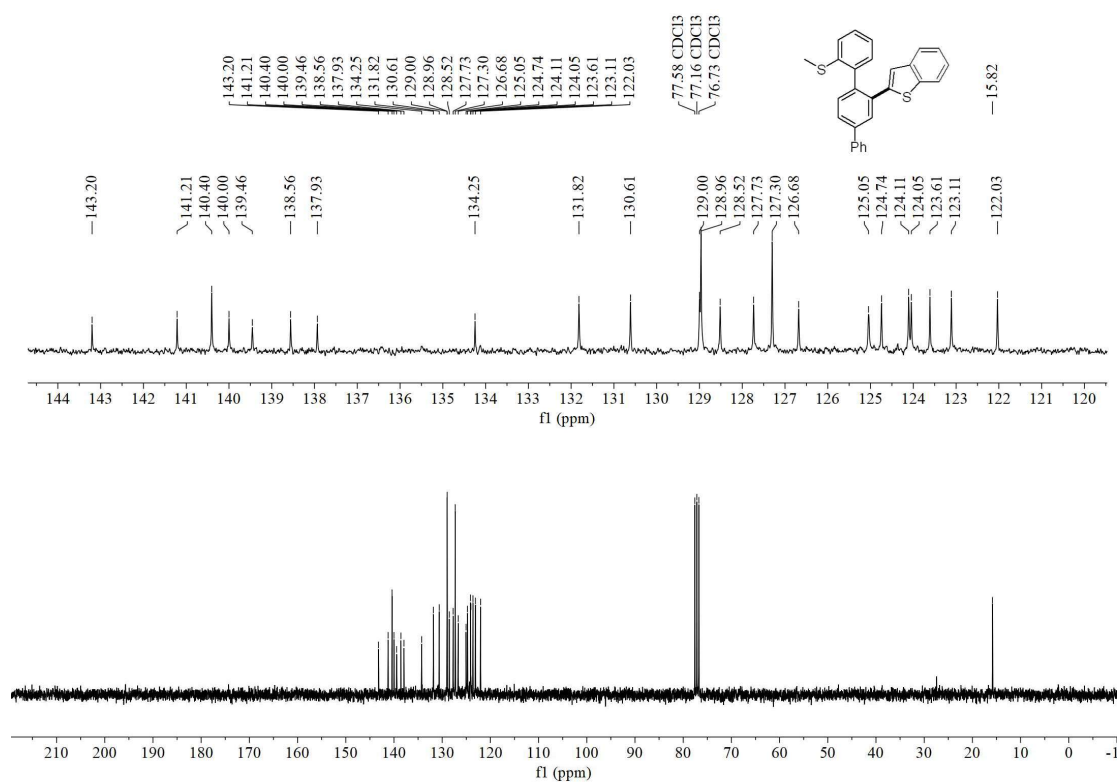



$^1\text{H}$  NMR spectrum of **4n'** in  $\text{CDCl}_3$  (300 MHz)

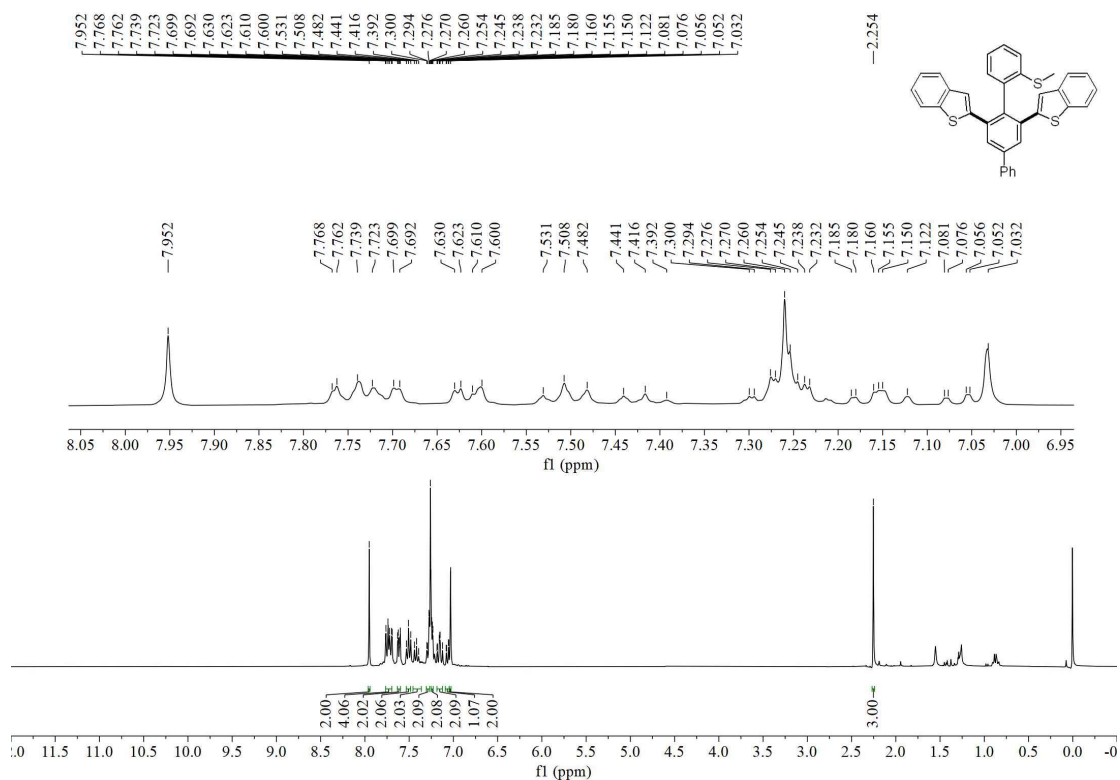

$^{13}\text{C}\{^1\text{H}\}$  NMR spectrum of **4n'** in  $\text{CDCl}_3$  (75 MHz)

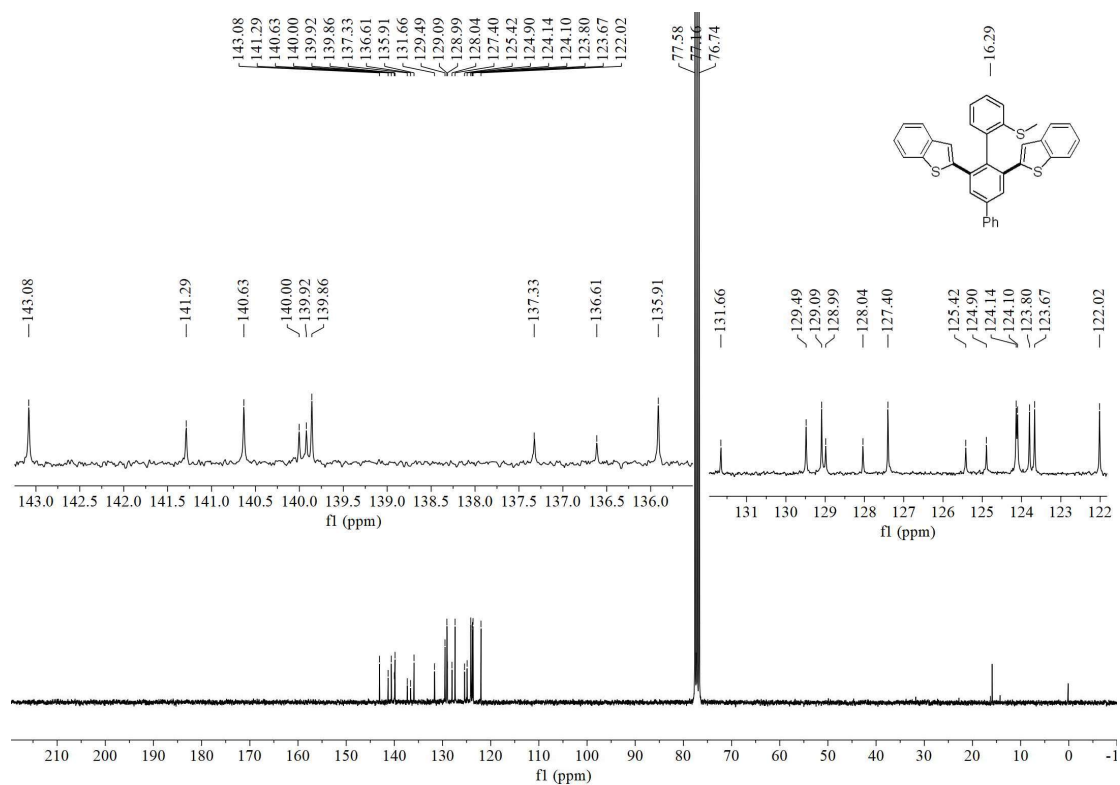

$^1\text{H}$  NMR spectrum of **4o** in  $\text{CDCl}_3$  (300 MHz)

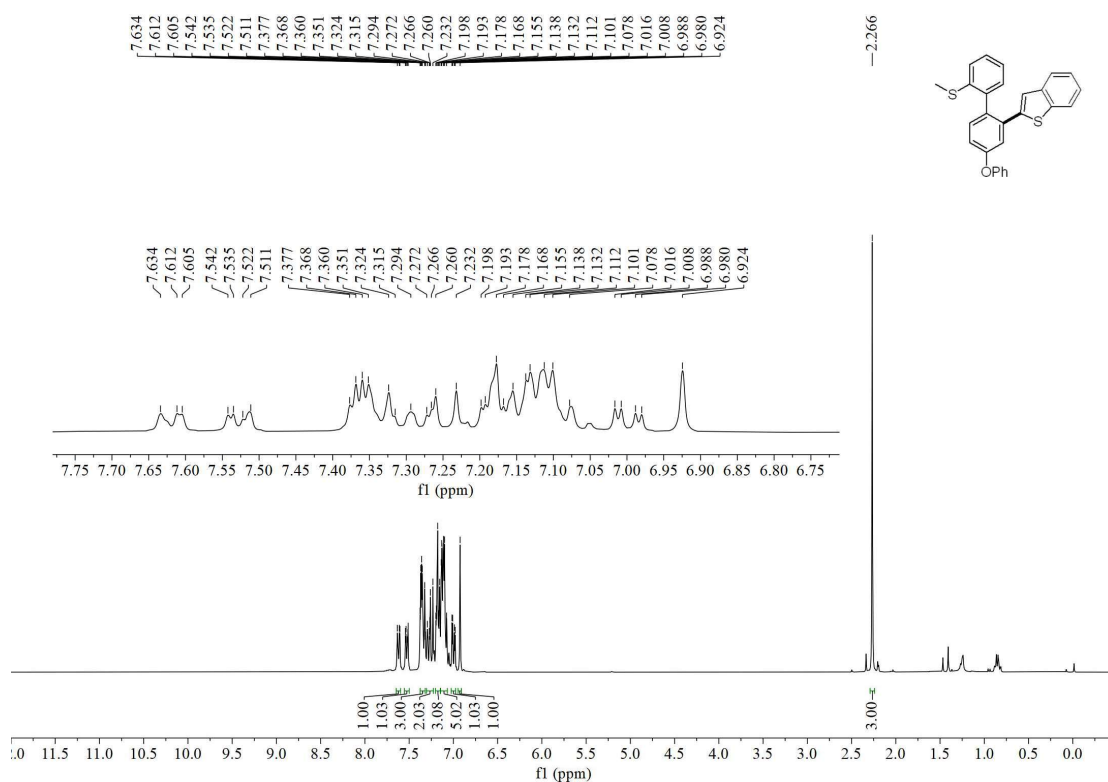

$^{13}\text{C}\{^1\text{H}\}$  NMR spectrum of **4o** in  $\text{CDCl}_3$  (75 MHz)

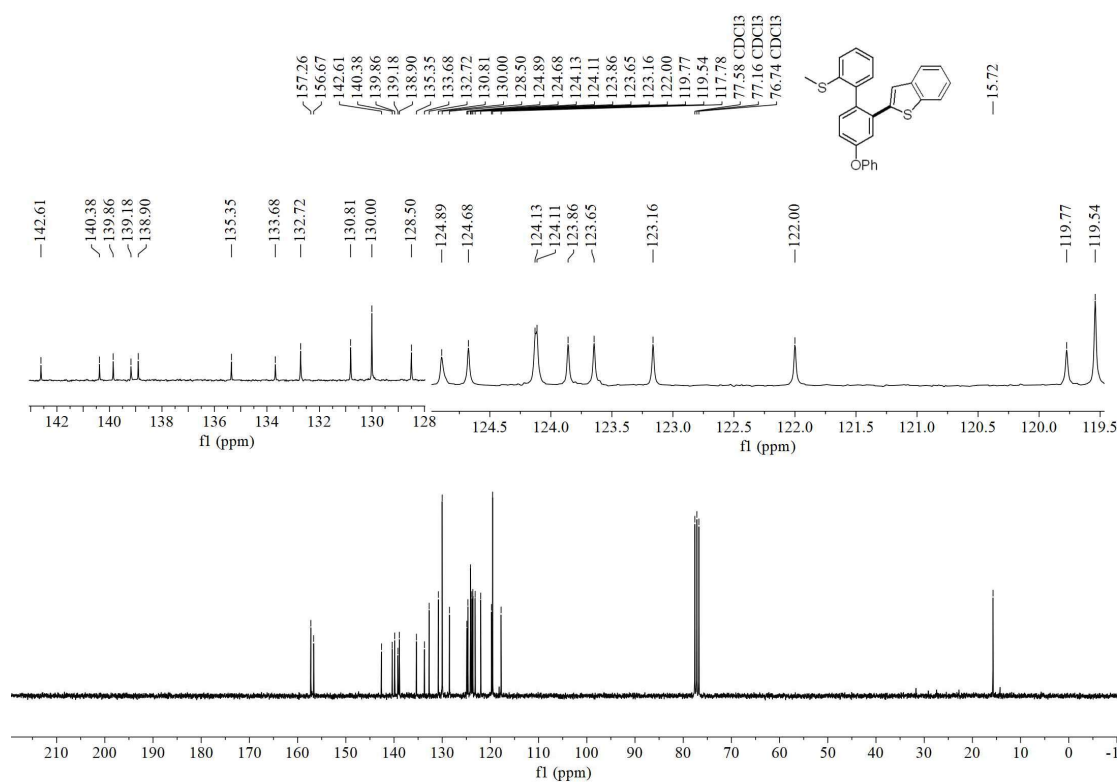



$^1\text{H}$  NMR spectrum of **4o'** in  $\text{CDCl}_3$  (300 MHz)

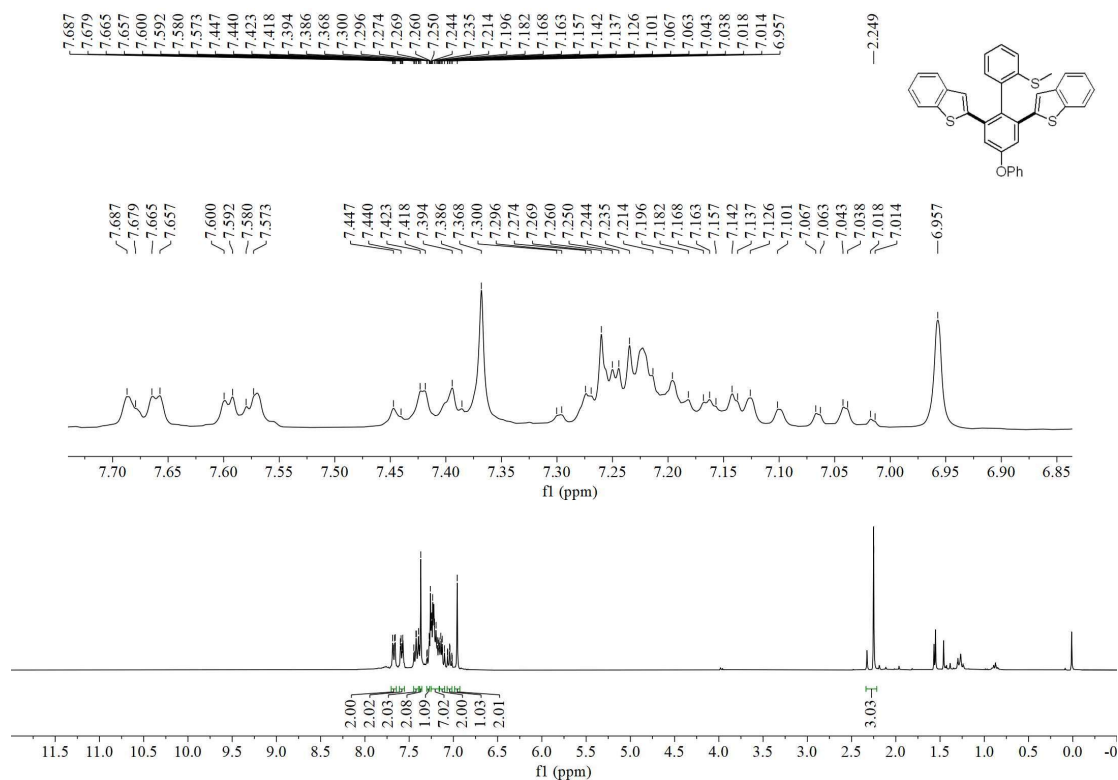

$^{13}\text{C}\{^1\text{H}\}$  NMR spectrum of **4o'** in  $\text{CDCl}_3$  (75 MHz)

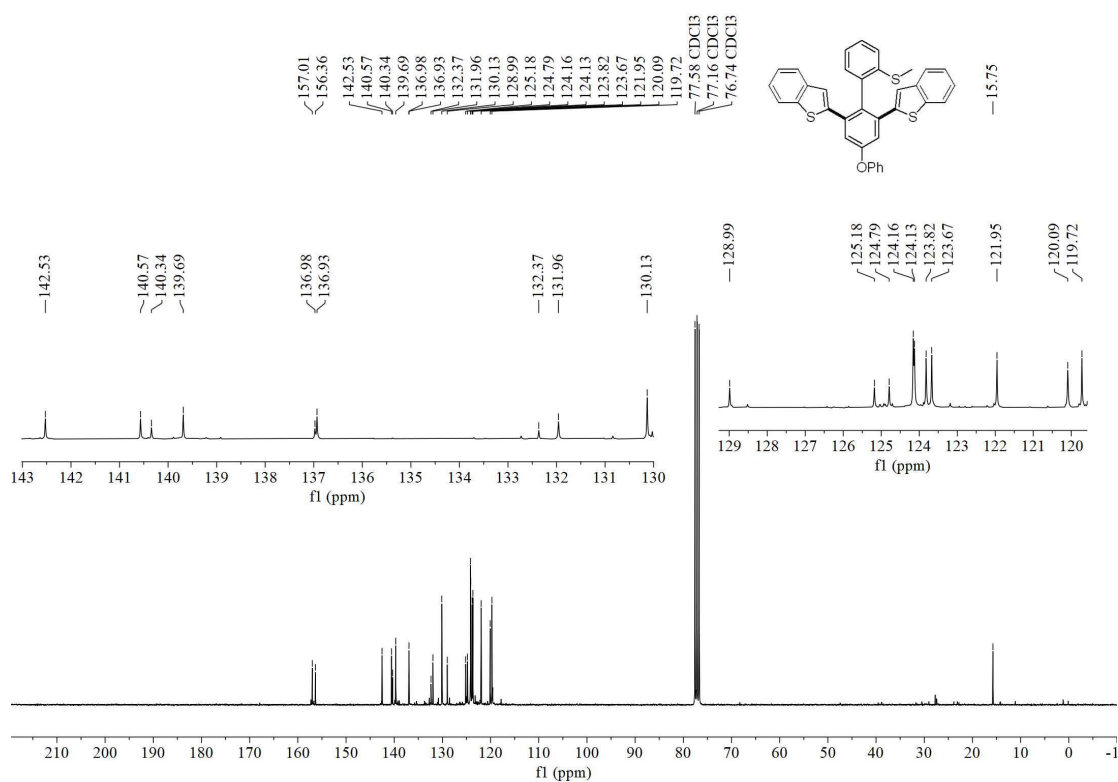

$^1\text{H}$  NMR spectrum of **4p** in  $\text{CDCl}_3$  (300 MHz)

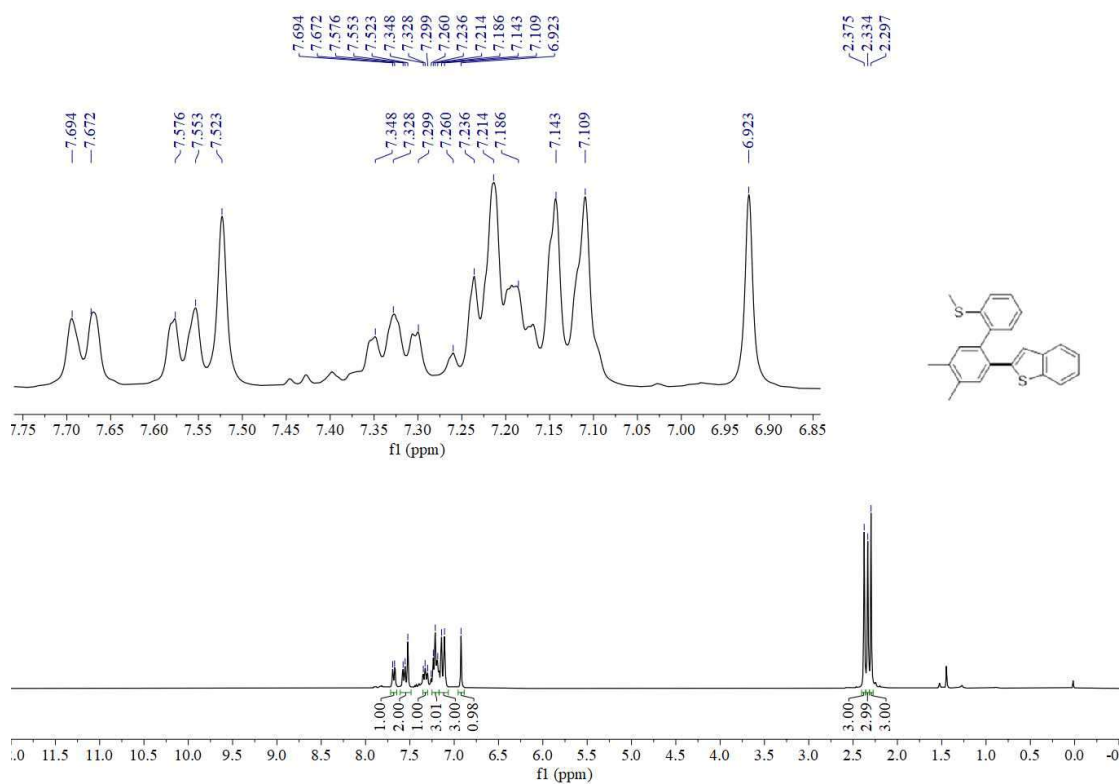

$^{13}\text{C}\{^1\text{H}\}$  NMR spectrum of **4p** in  $\text{CDCl}_3$  (75 MHz)

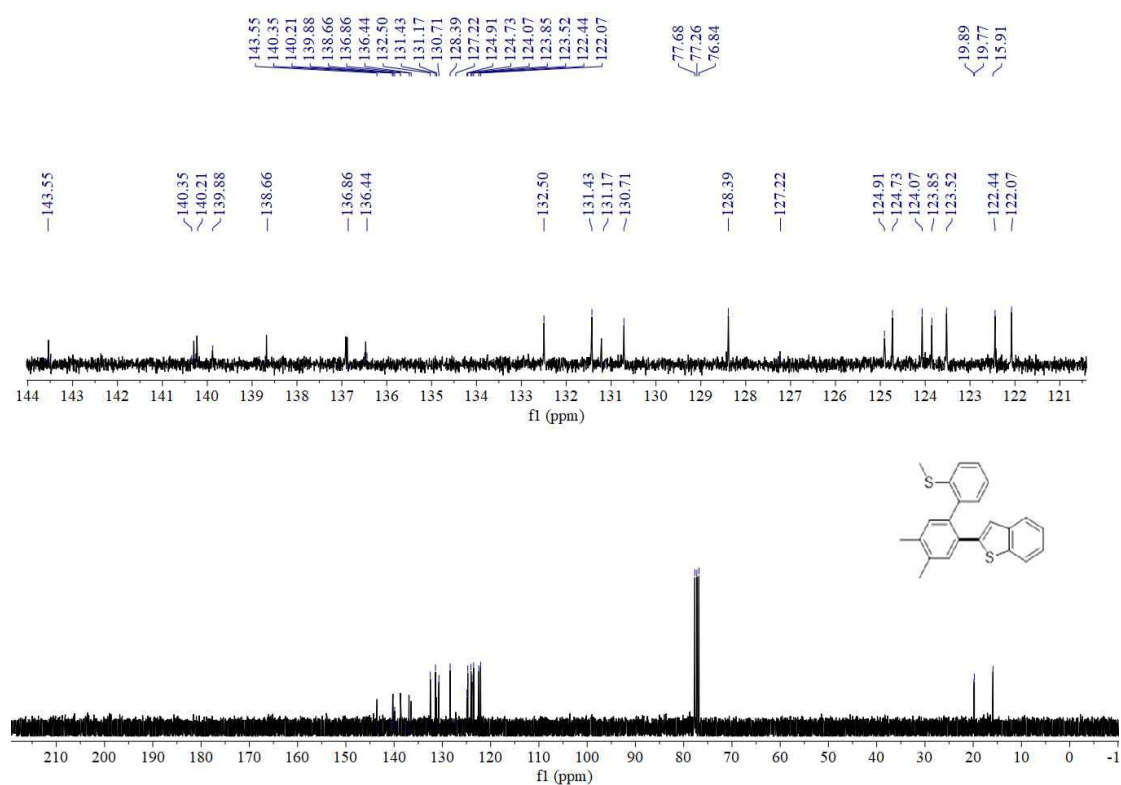

$^1\text{H}$  NMR spectrum of **4q** in  $\text{CDCl}_3$  (300 MHz)

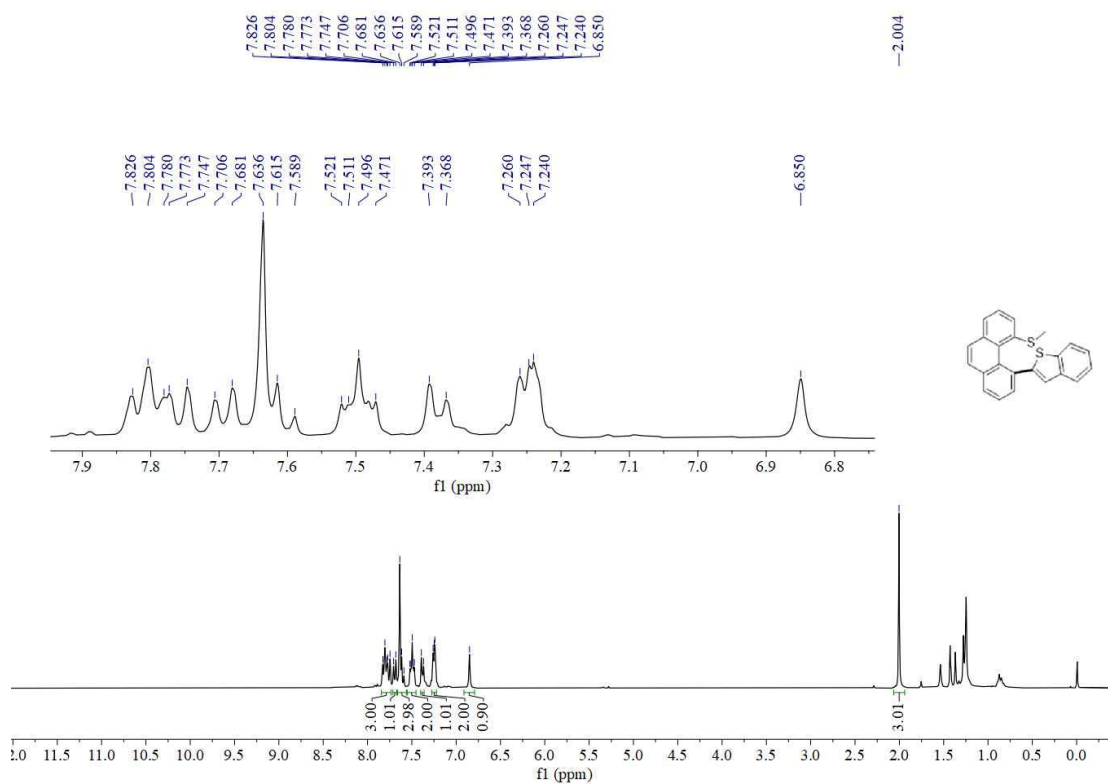

$^{13}\text{C}\{^1\text{H}\}$  NMR spectrum of **4q** in  $\text{CDCl}_3$  (75 MHz)

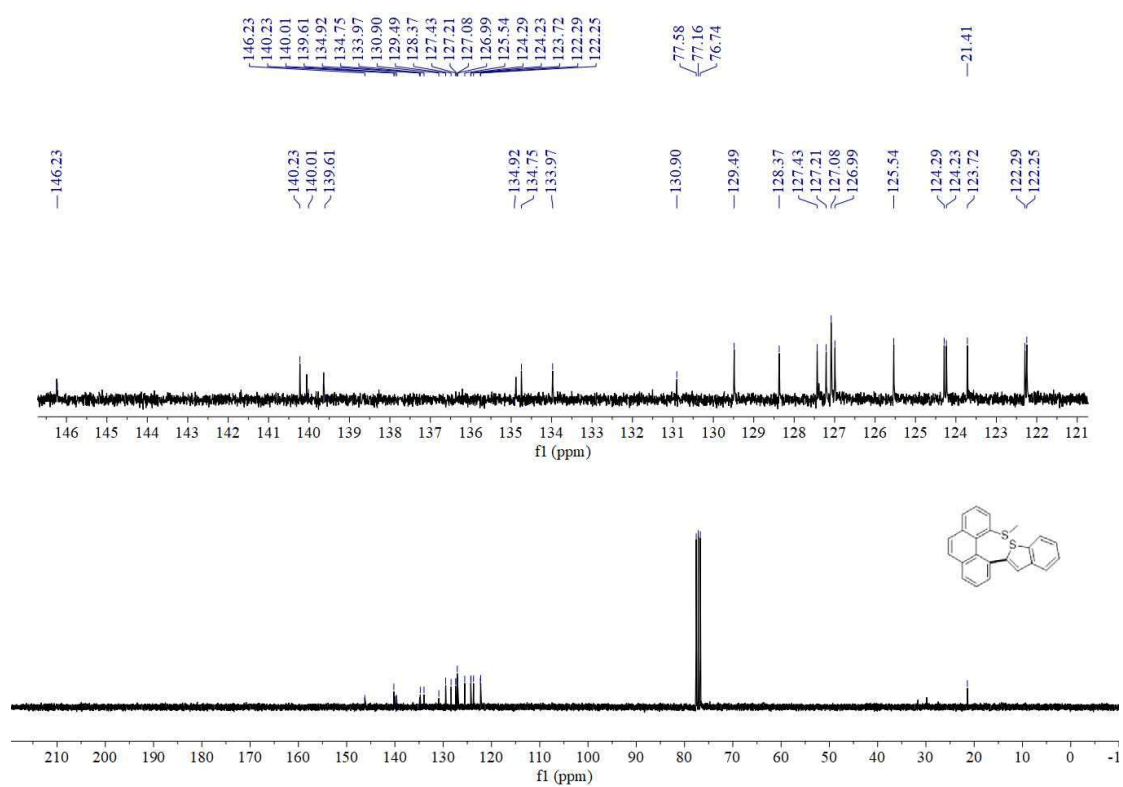

**Figure S10.**  $^1\text{H}$  NMR spectra of compound **10** in  $\text{CDCl}_3$ . The top spectrum shows the aromatic region (7.02–7.83 ppm) with 16 peaks labeled with chemical shifts. The bottom spectrum shows the aliphatic region (0.95–2.11 ppm) with 5 peaks labeled with chemical shifts. The chemical structure of **10** is shown on the right.

[illegible]

$^1\text{H}$  NMR spectrum of **4s** in  $\text{CDCl}_3$  (300 MHz)

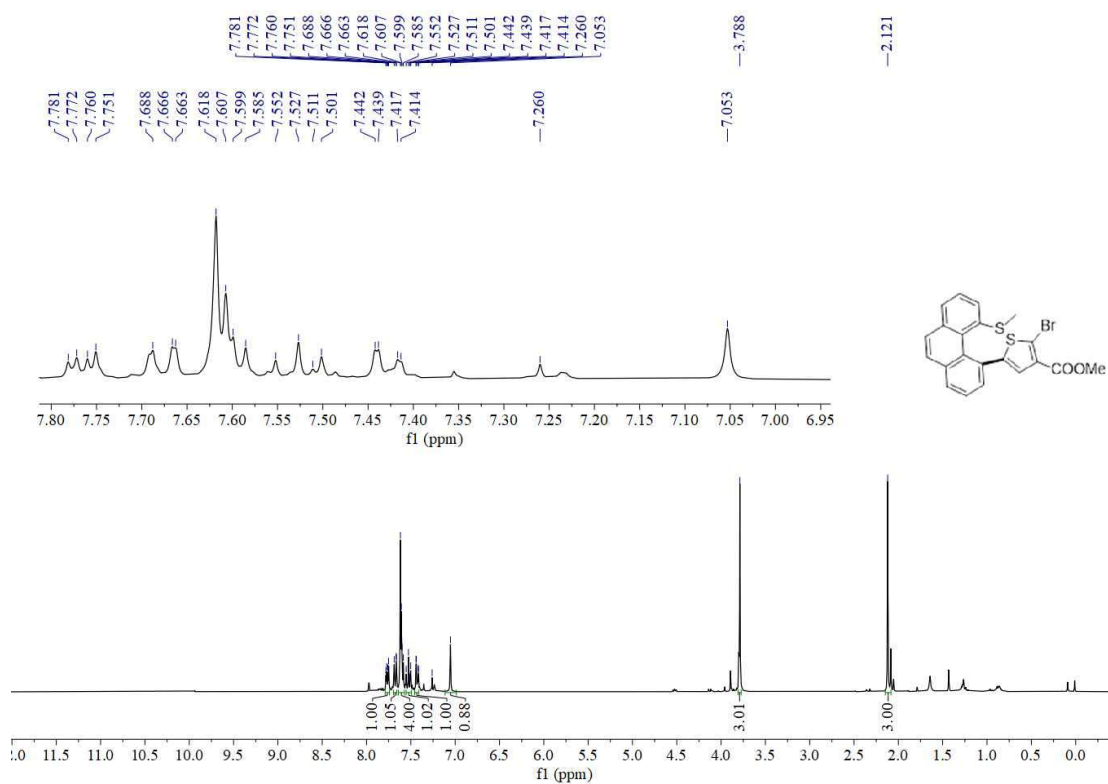

$^{13}\text{C}\{^1\text{H}\}$  NMR spectrum of **4s** in  $\text{CDCl}_3$  (75 MHz)

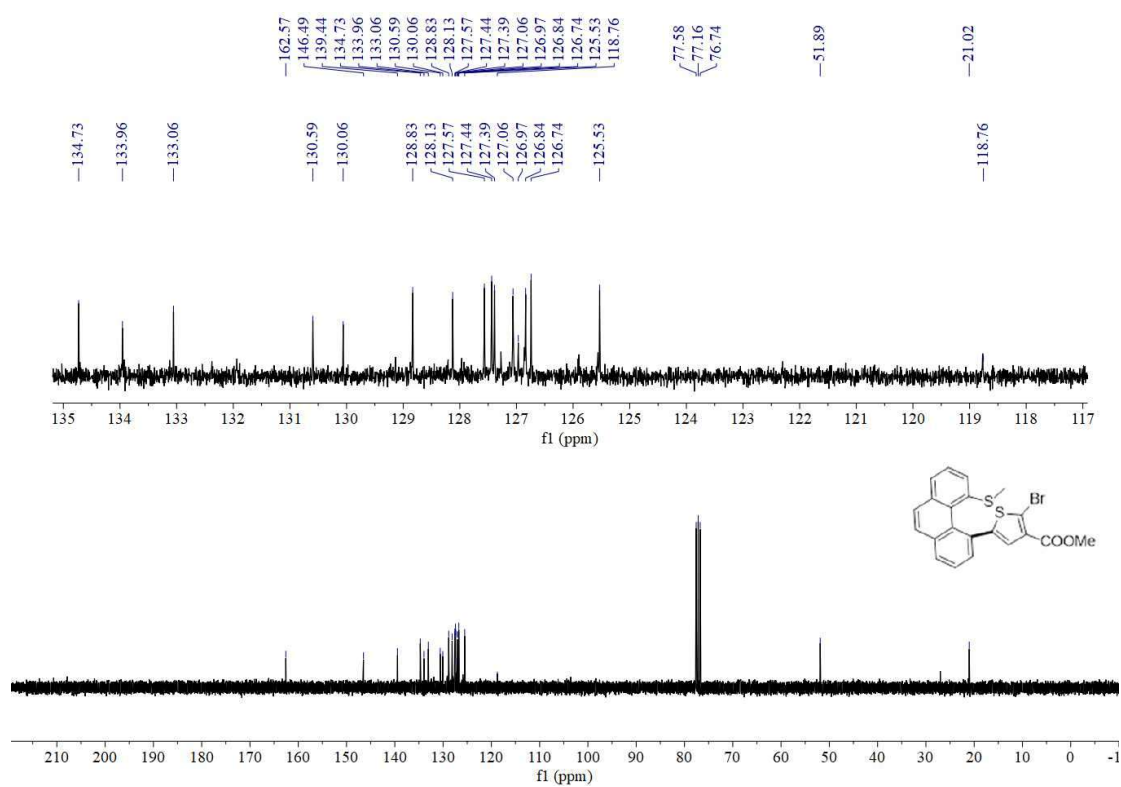

$^1\text{H}$  NMR spectrum of **6a** in  $\text{CDCl}_3$  (300 MHz)

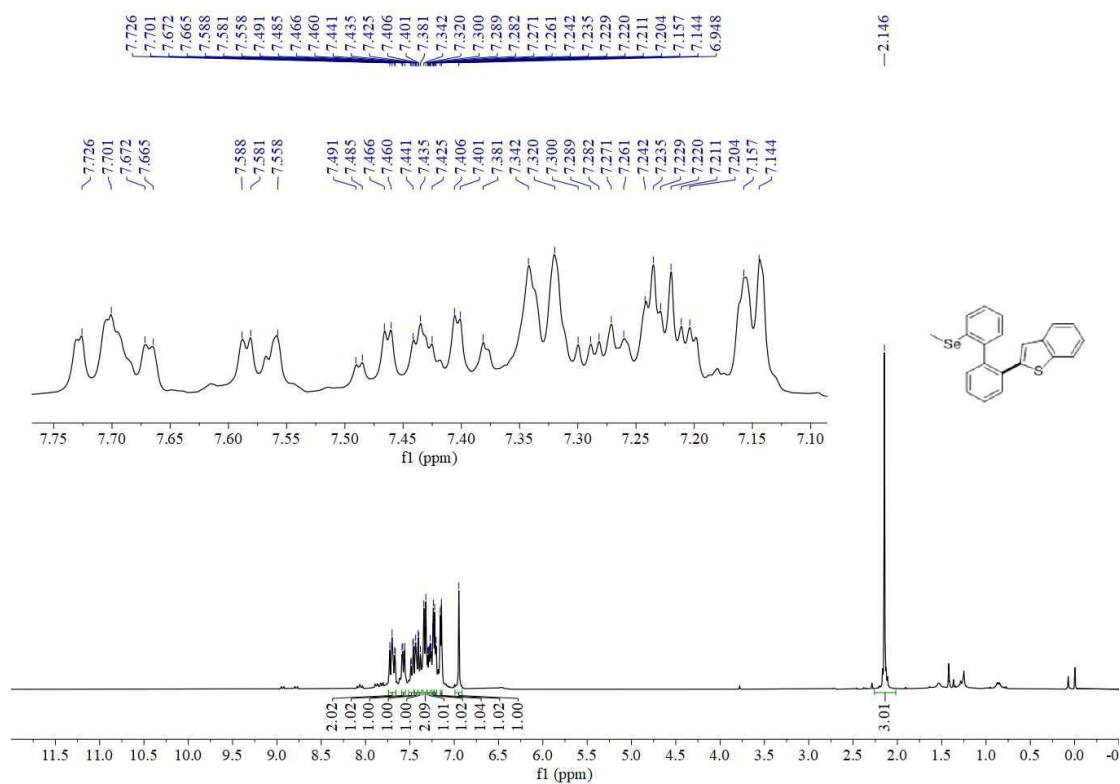

$^{13}\text{C}\{^1\text{H}\}$  NMR spectrum of **6a** in  $\text{CDCl}_3$  (75 MHz)

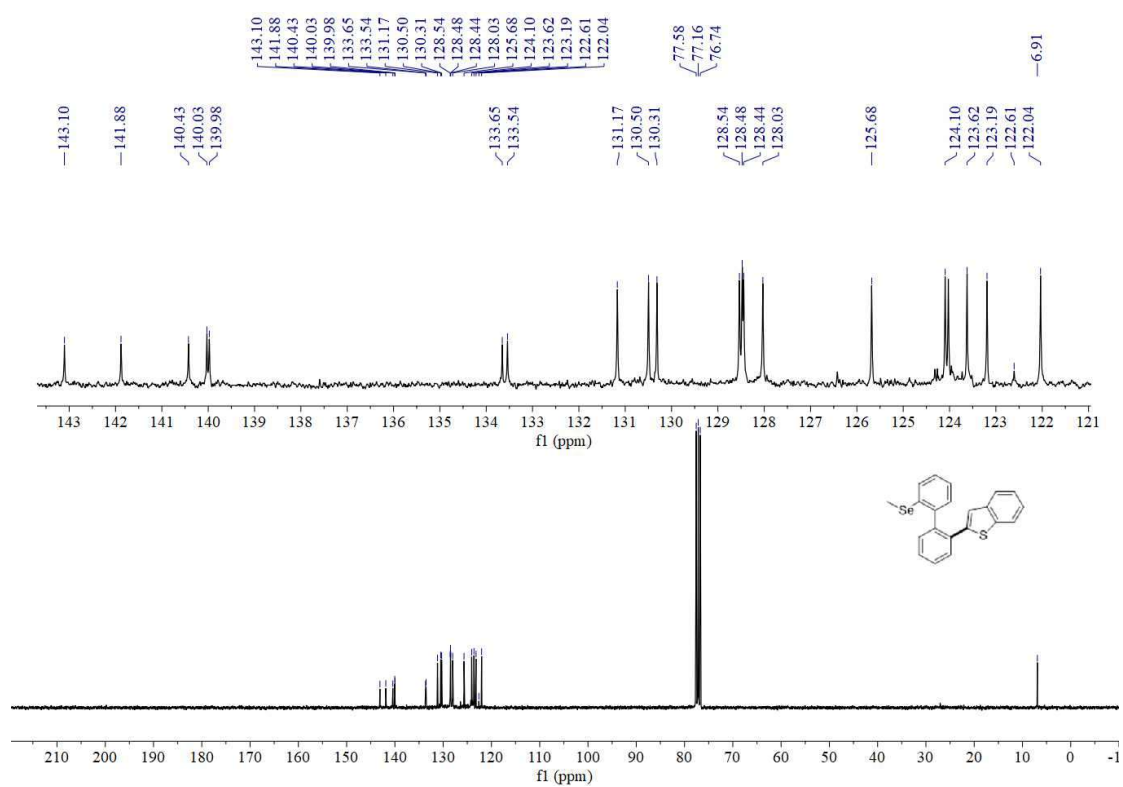



$^1\text{H}$  NMR spectrum of **6b** in  $\text{CDCl}_3$  (300 MHz)

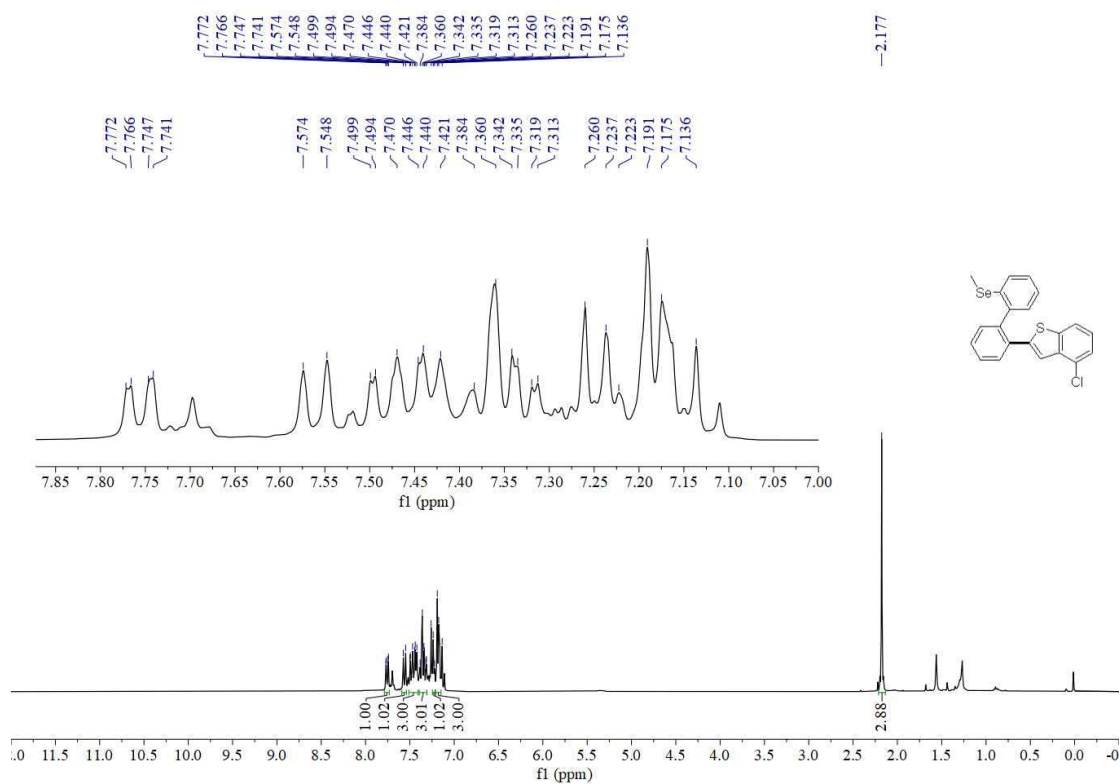

$^{13}\text{C}\{^1\text{H}\}$  NMR spectrum of **6b** in  $\text{CDCl}_3$  (75 MHz)

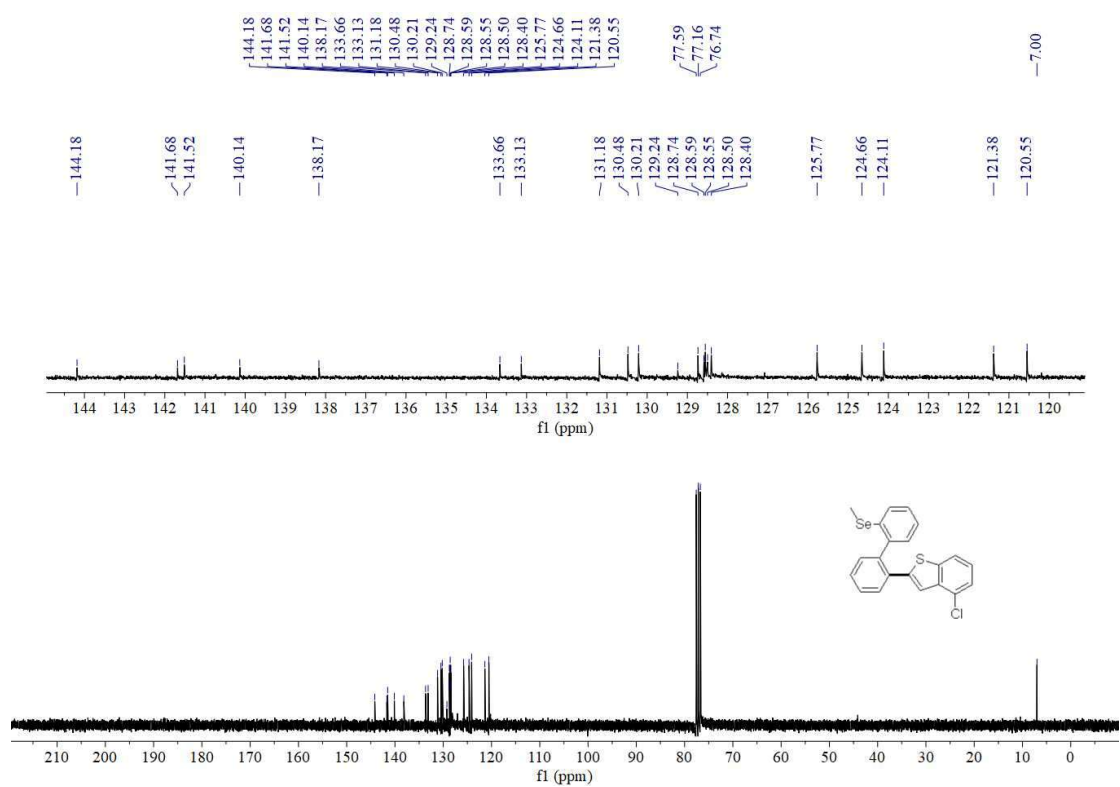

$^1\text{H}$  NMR spectrum of **6c** in  $\text{CDCl}_3$  (300 MHz)

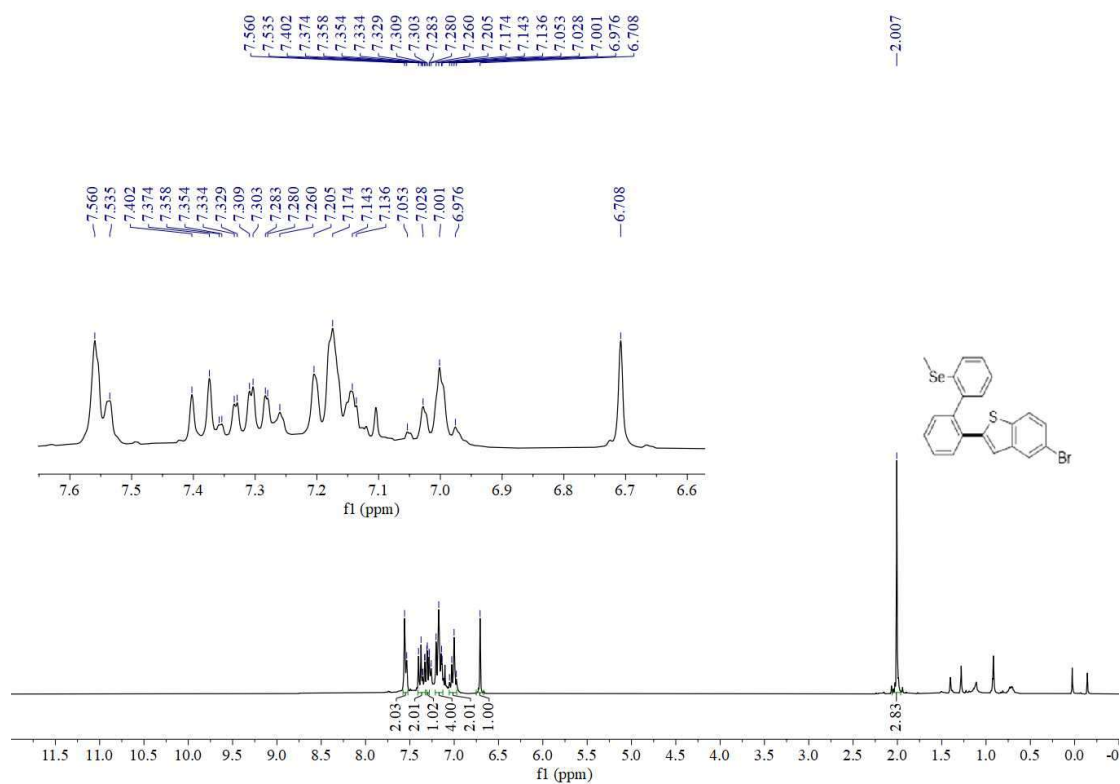

$^{13}\text{C}\{^1\text{H}\}$  NMR spectrum of **6c** in  $\text{CDCl}_3$  (75 MHz)

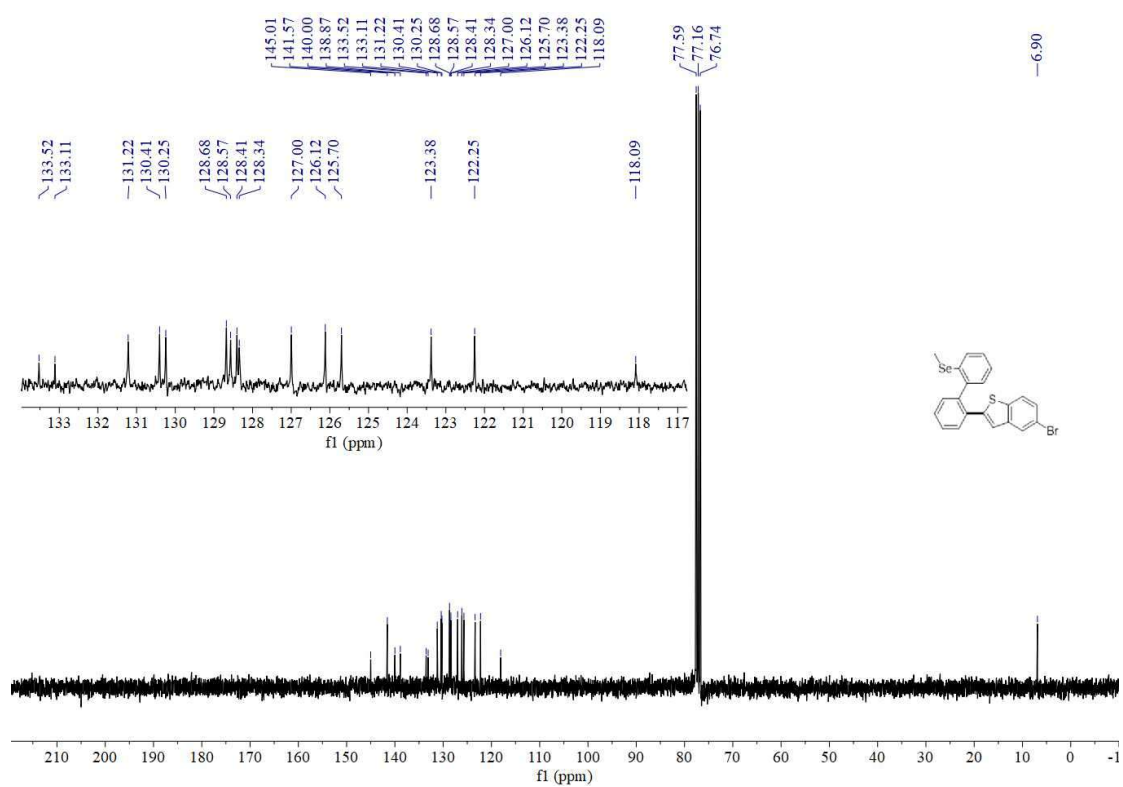



$^1\text{H}$  NMR spectrum of **6d** in  $\text{DMSO}-d_6$  (300 MHz)

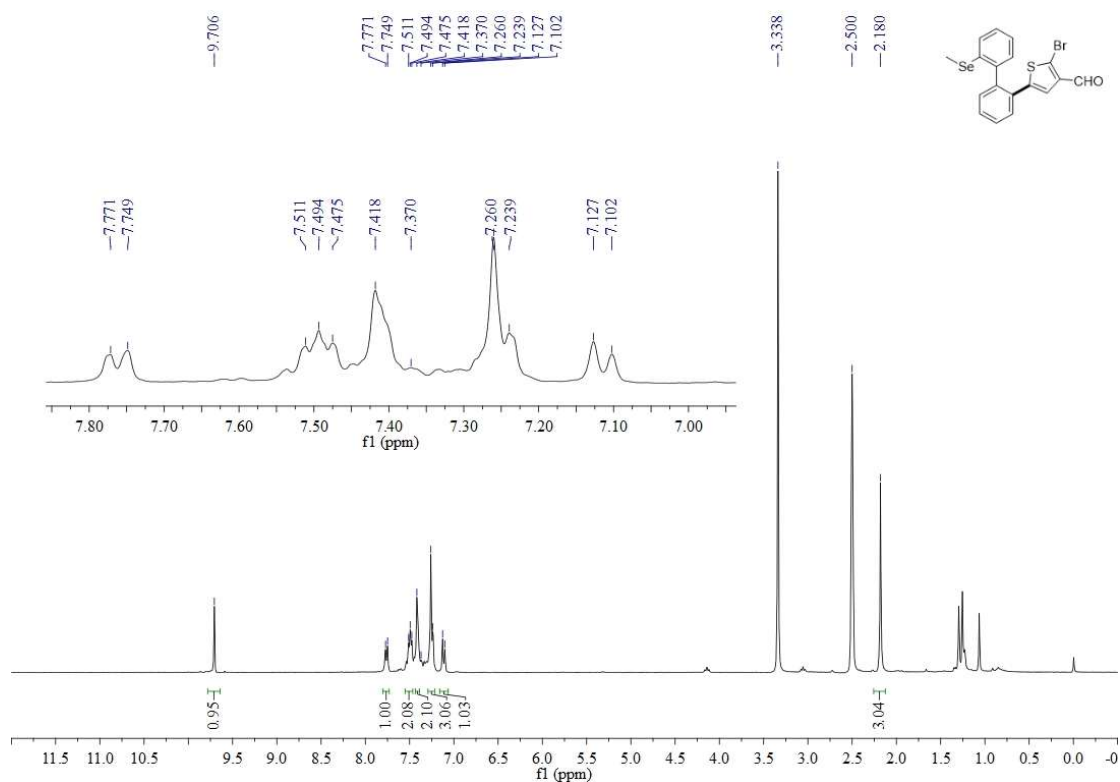

$^{13}\text{C}\{^1\text{H}\}$  NMR spectrum of **6d** in  $\text{DMSO}-d_6$  (75 MHz)

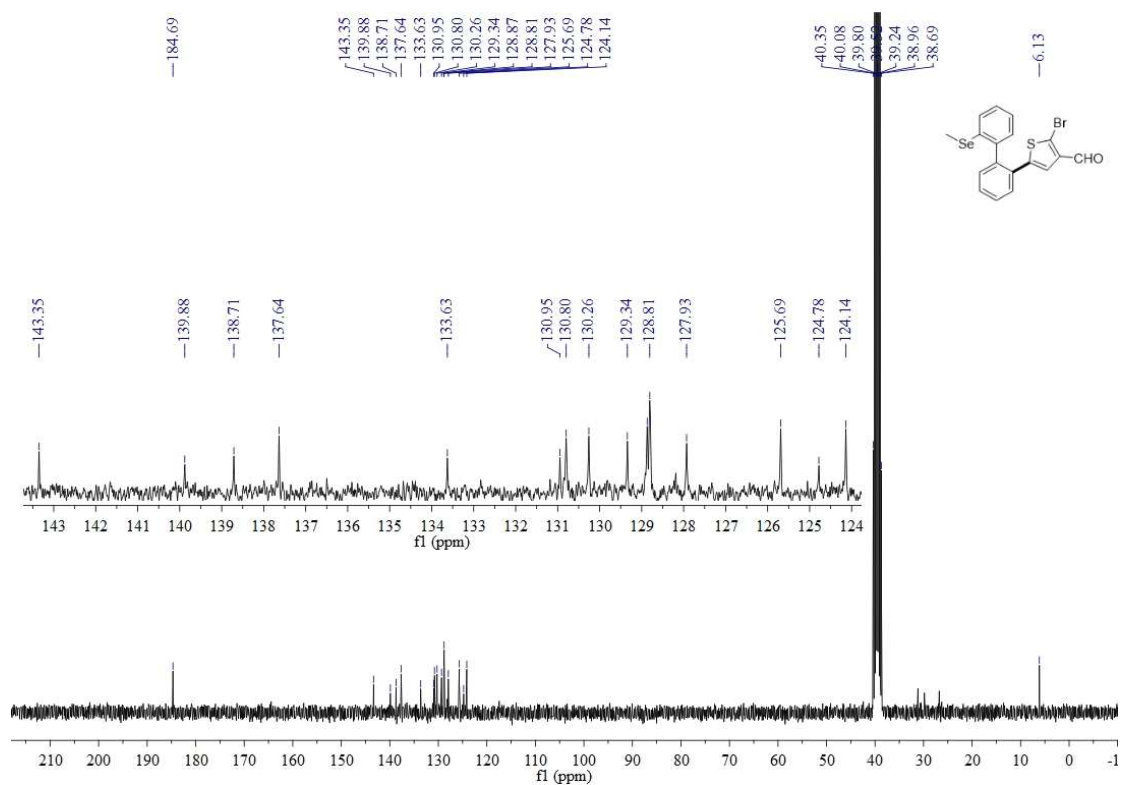

$^1\text{H}$  NMR spectrum of **6e** in  $\text{CDCl}_3$  (300 MHz)

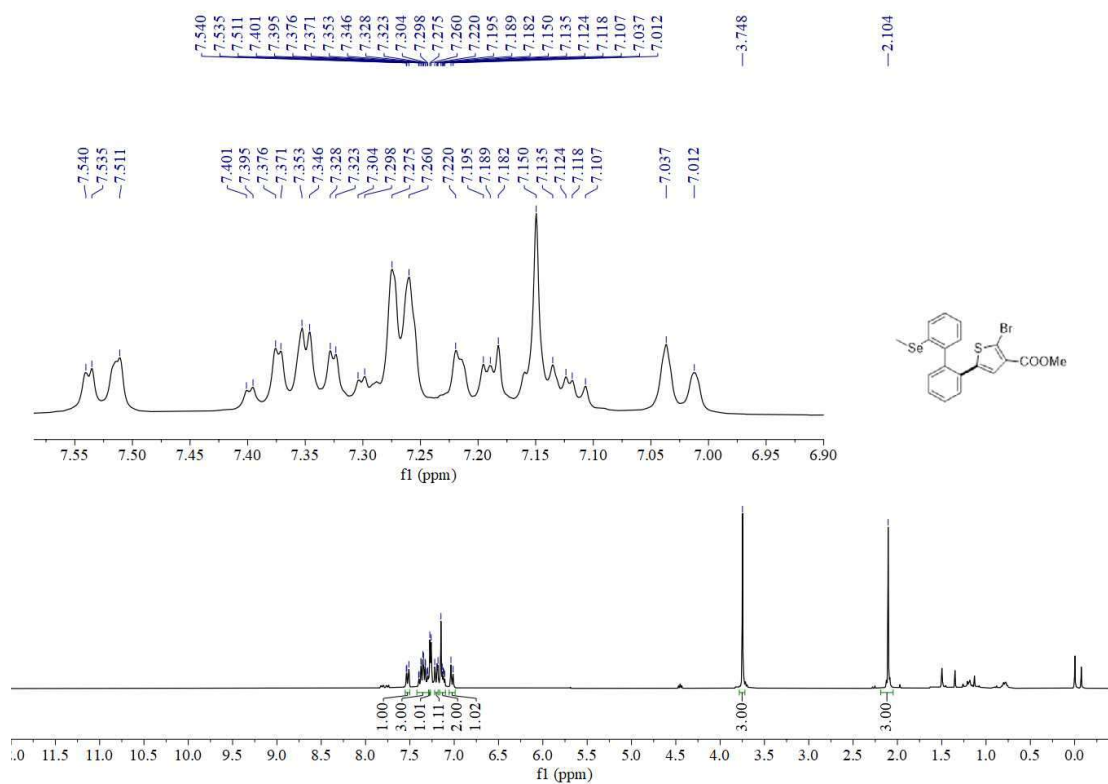

$^{13}\text{C}\{^1\text{H}\}$  NMR spectrum of **6e** in  $\text{CDCl}_3$  (75 MHz)

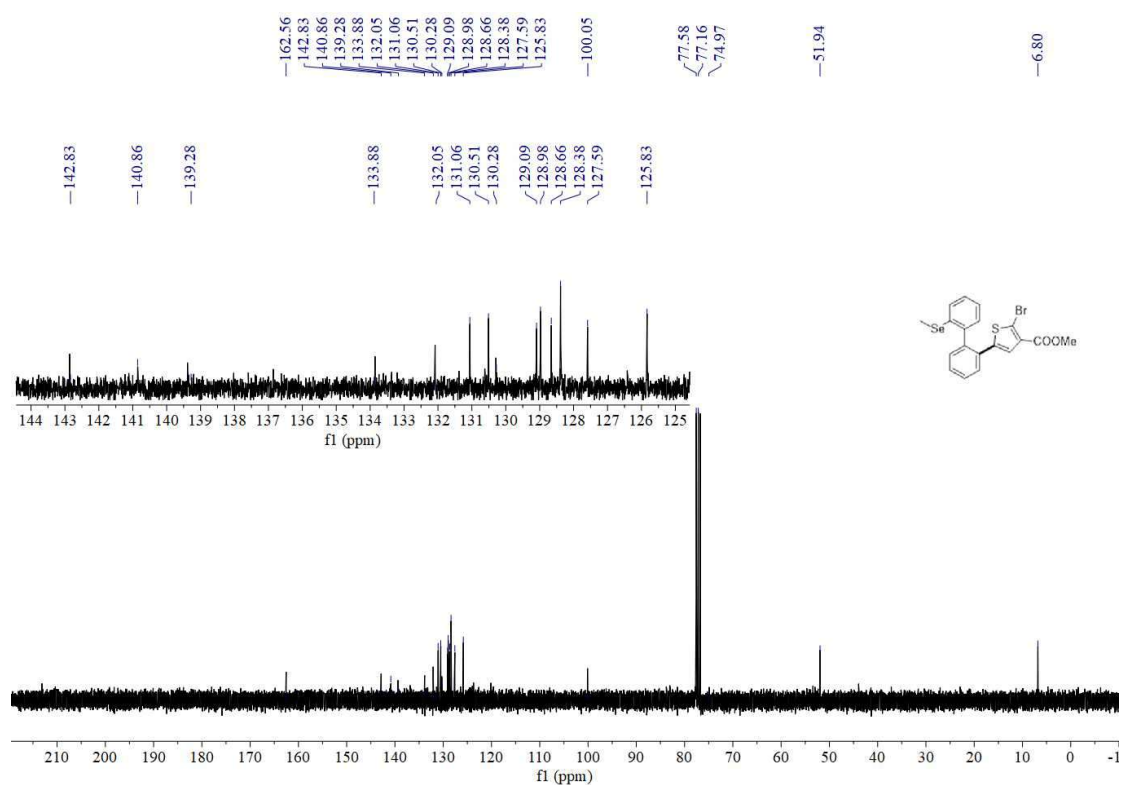

$^1\text{H}$  NMR spectrum of **6f** in  $\text{CDCl}_3$  (300 MHz)

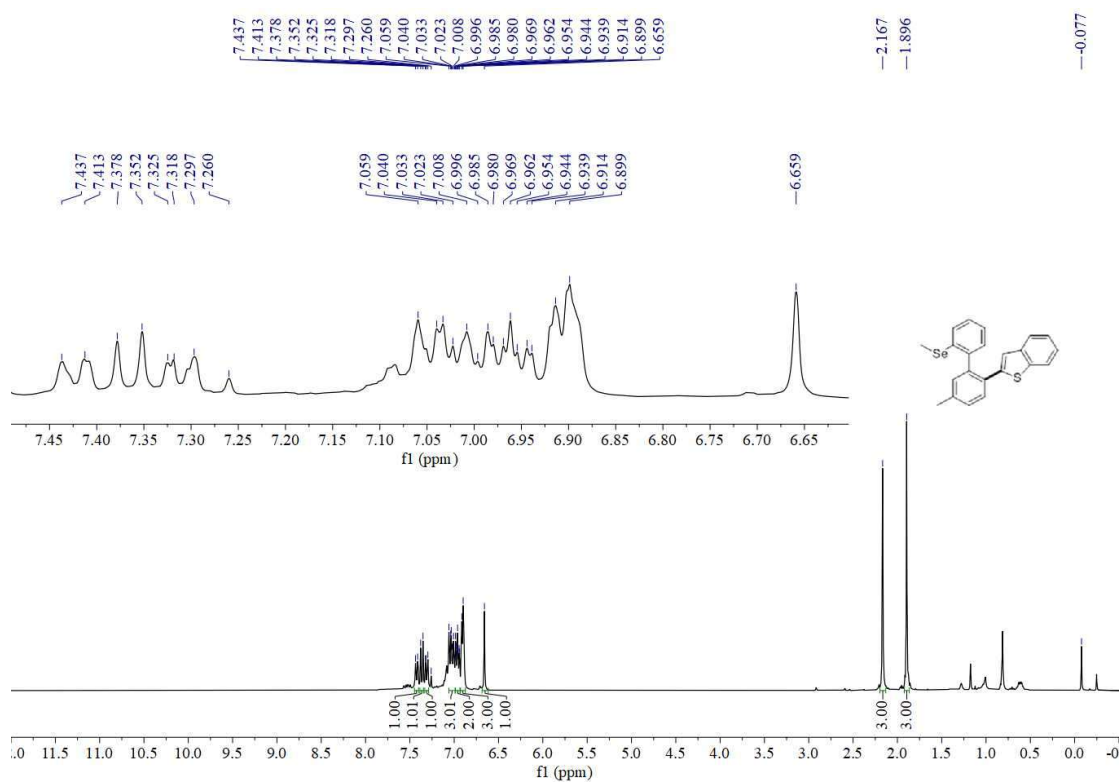

$^{13}\text{C}\{^1\text{H}\}$  NMR spectrum of **6f** in  $\text{CDCl}_3$  (75 MHz)

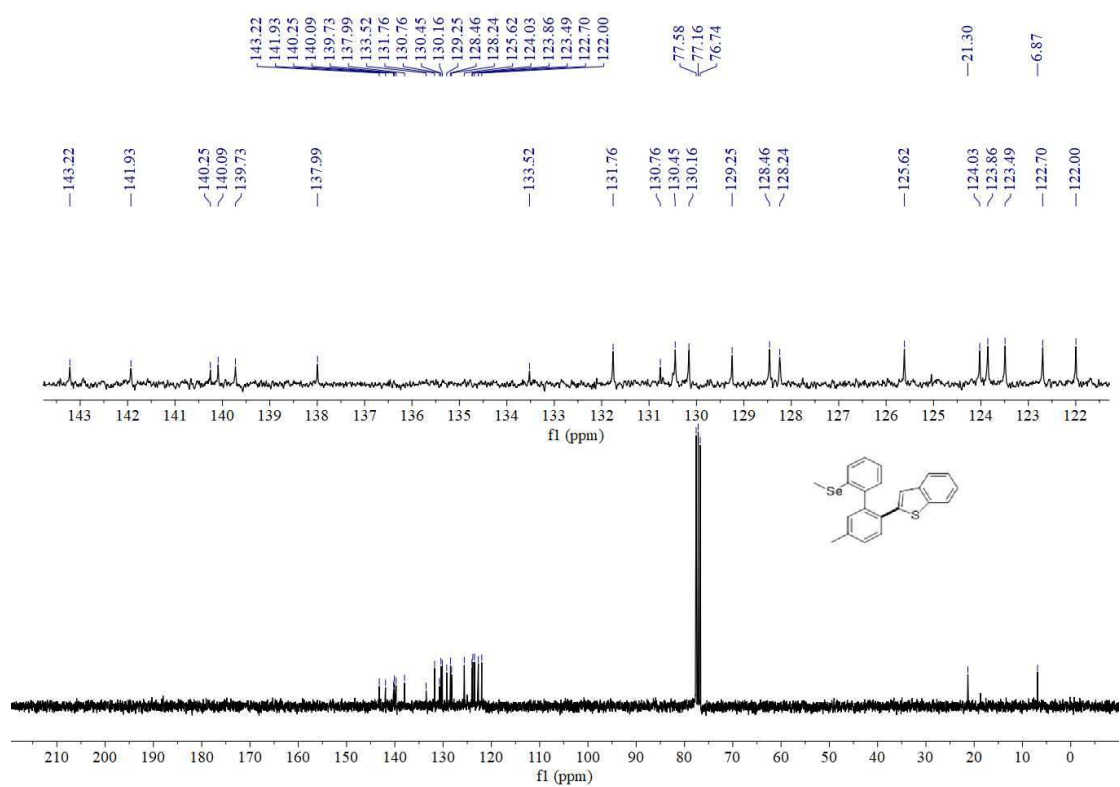

$^1\text{H}$  NMR spectrum of **6g** in  $\text{CDCl}_3$  (300 MHz)

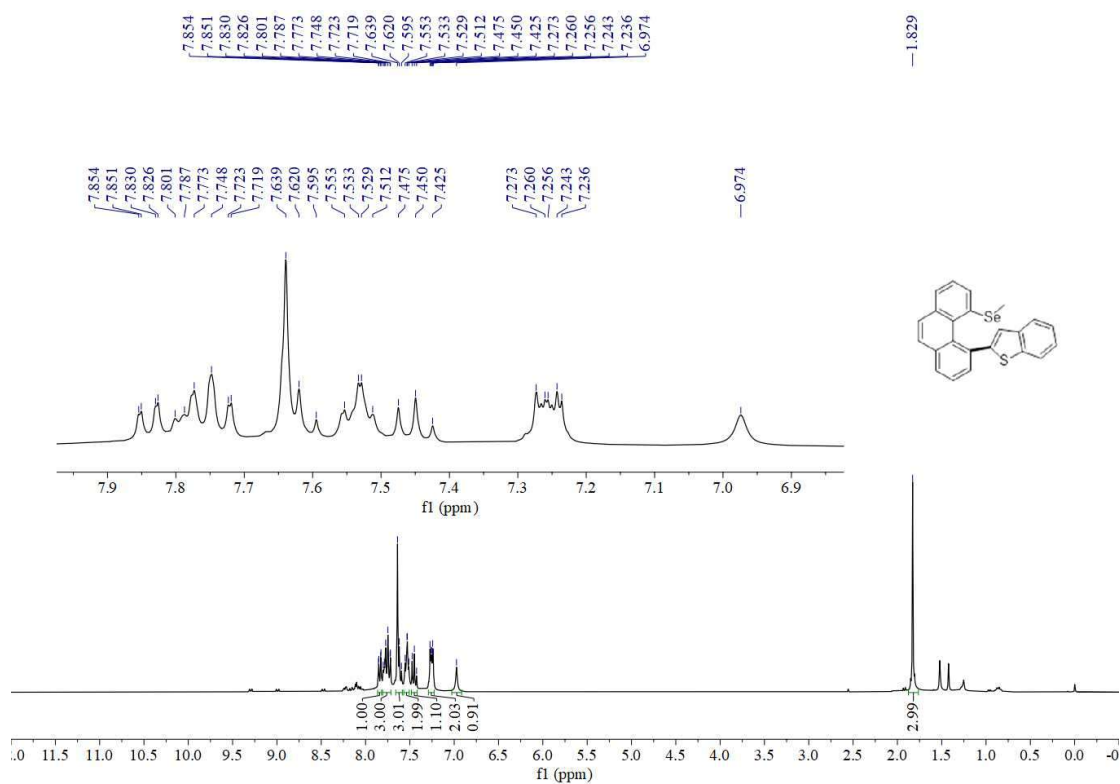

$^{13}\text{C}\{^1\text{H}\}$  NMR spectrum of **6g** in  $\text{CDCl}_3$  (75 MHz)

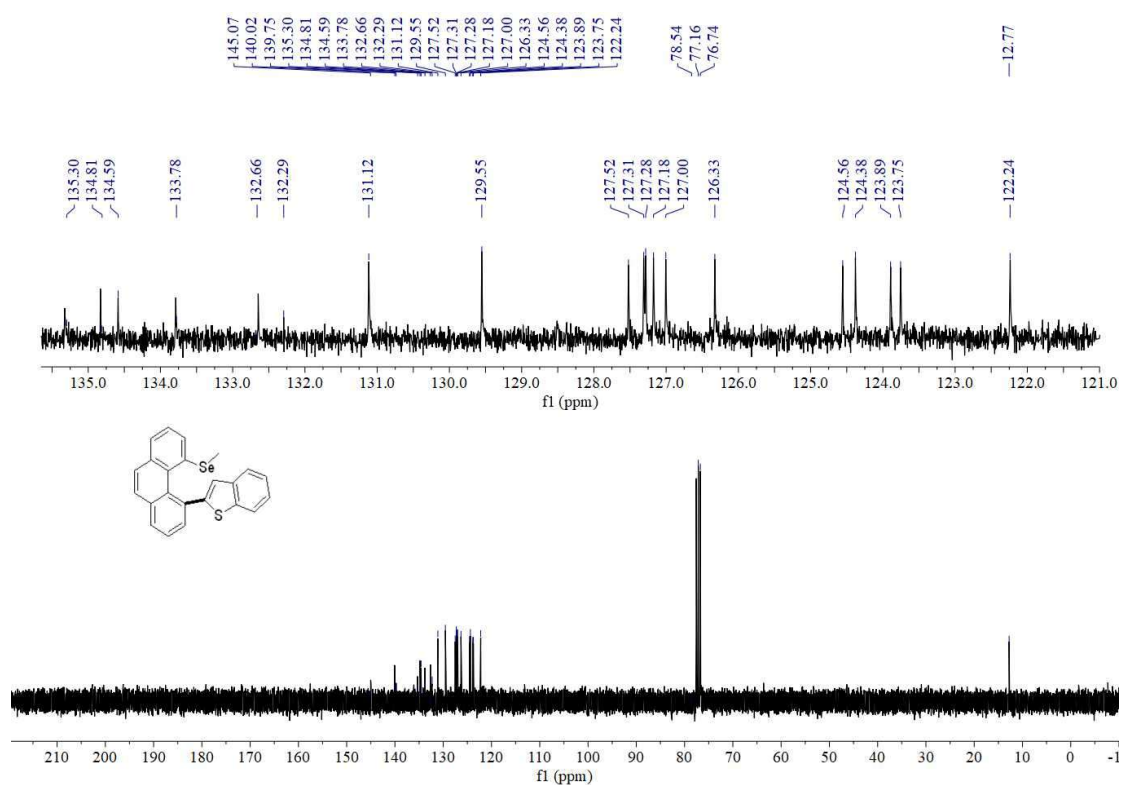

$^1\text{H}$  NMR spectrum of **7a** in  $\text{CDCl}_3$  (300 MHz)

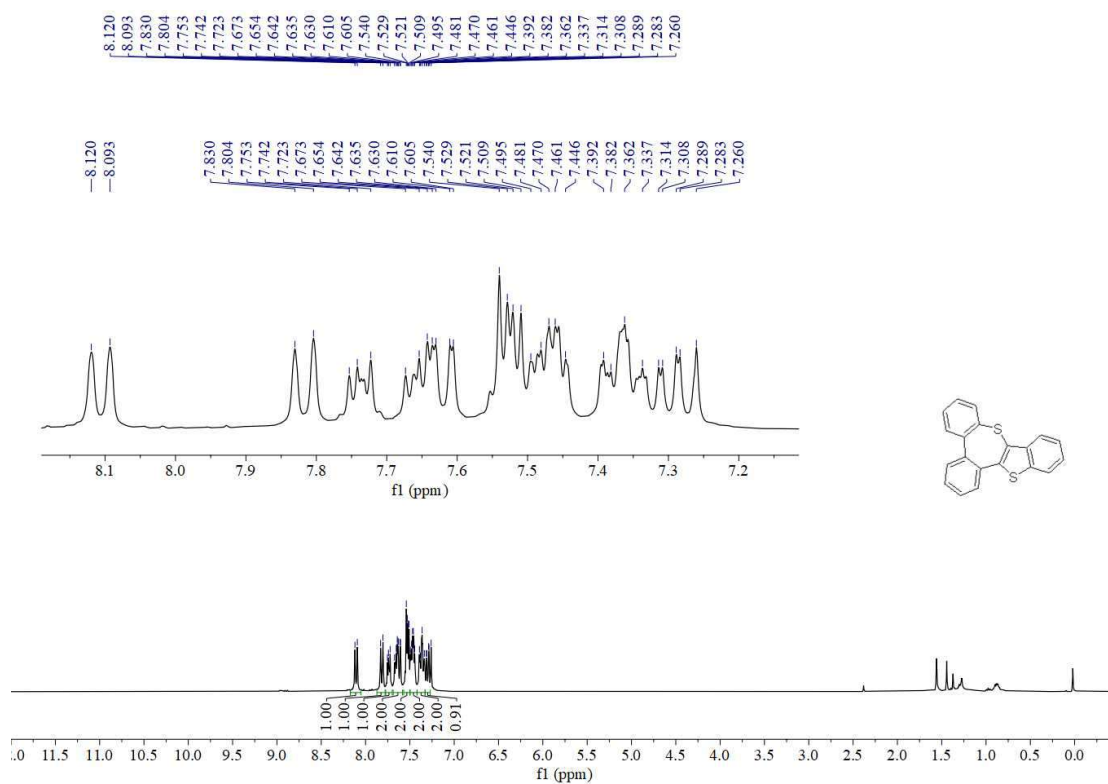

$^{13}\text{C}\{^1\text{H}\}$  NMR spectrum of **7a** in  $\text{CDCl}_3$  (75 MHz)

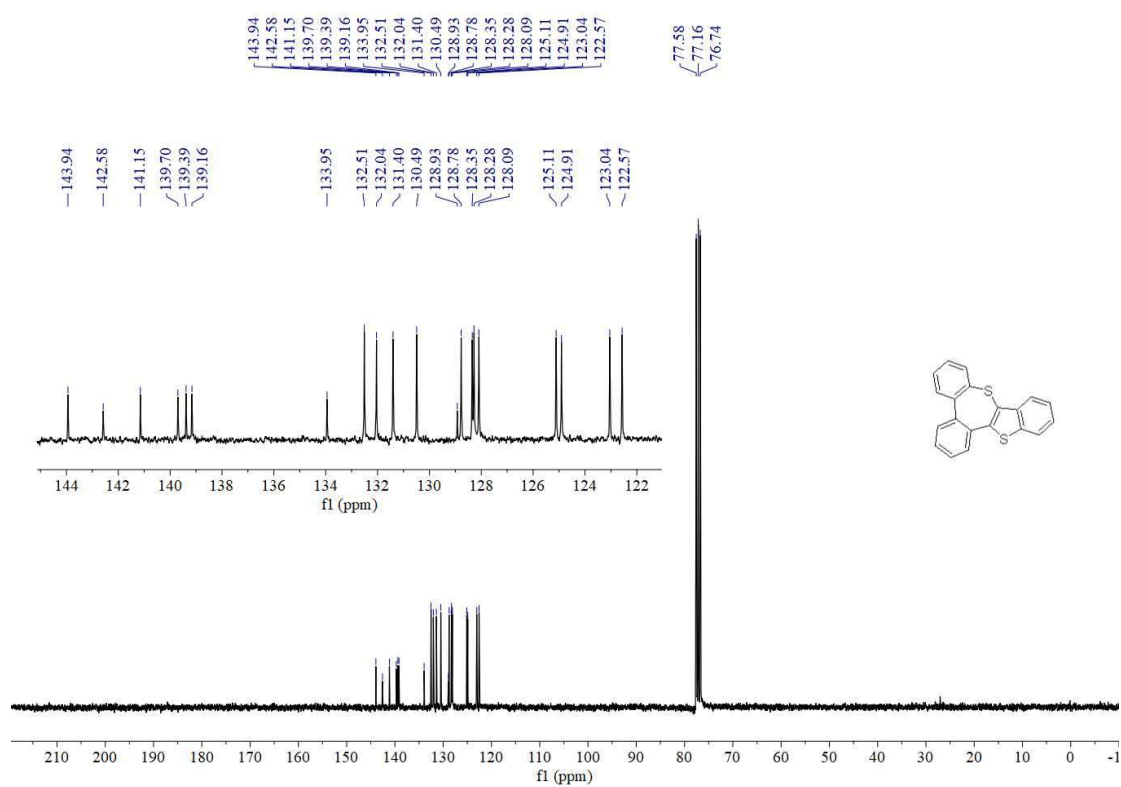

$^1\text{H}$  NMR spectrum of **7b** in  $\text{CDCl}_3$  (300 MHz)

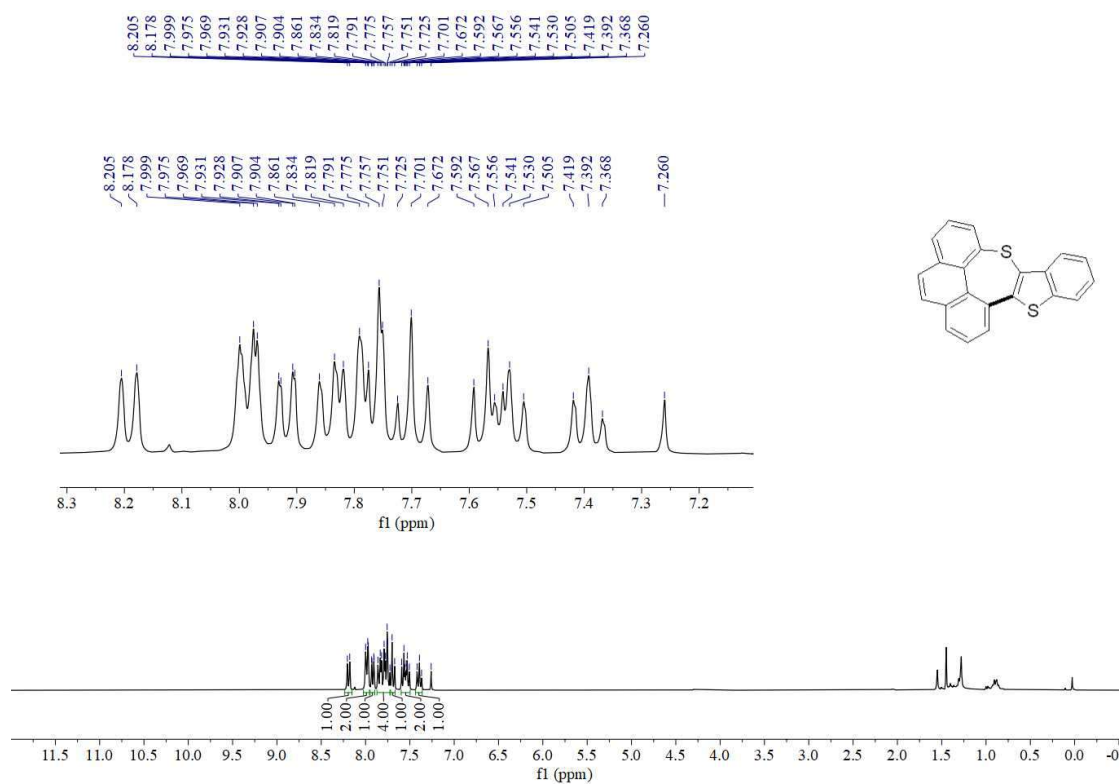

$^{13}\text{C}\{^1\text{H}\}$  NMR spectrum of **7b** in  $\text{CDCl}_3$  (75 MHz)

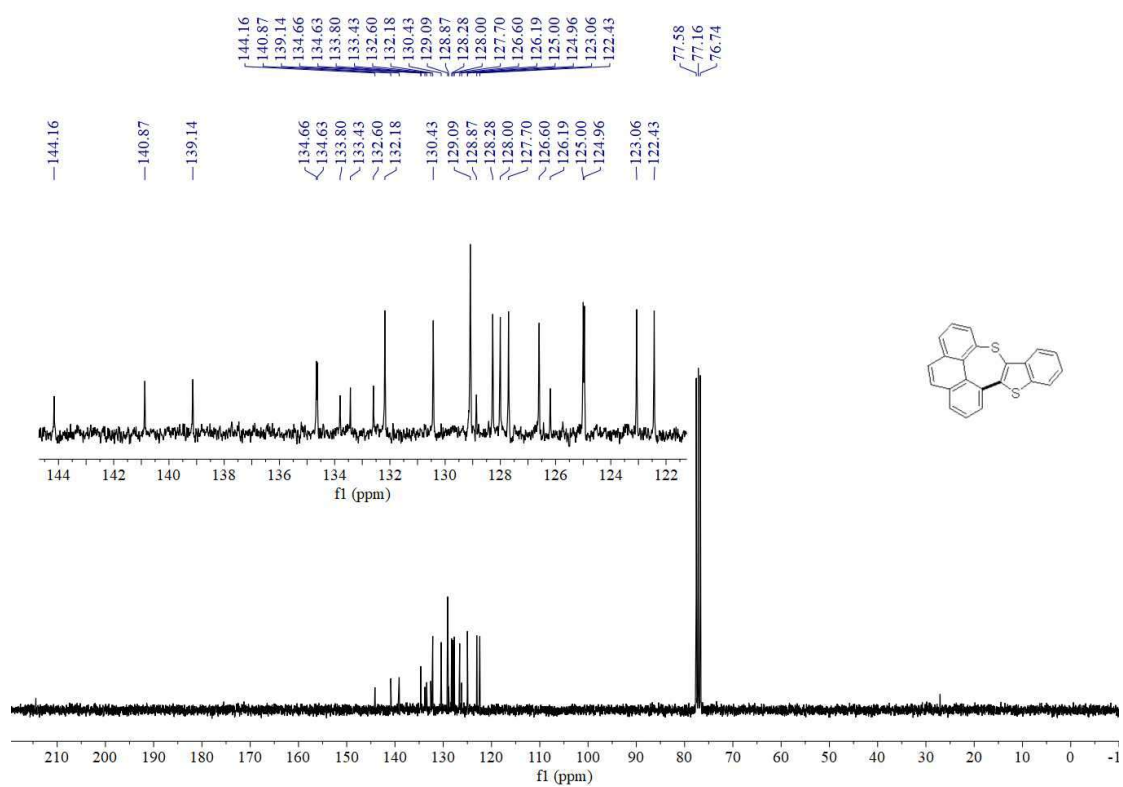



$^1\text{H}$  NMR spectrum of **8a** in  $\text{CDCl}_3$  (300 MHz)

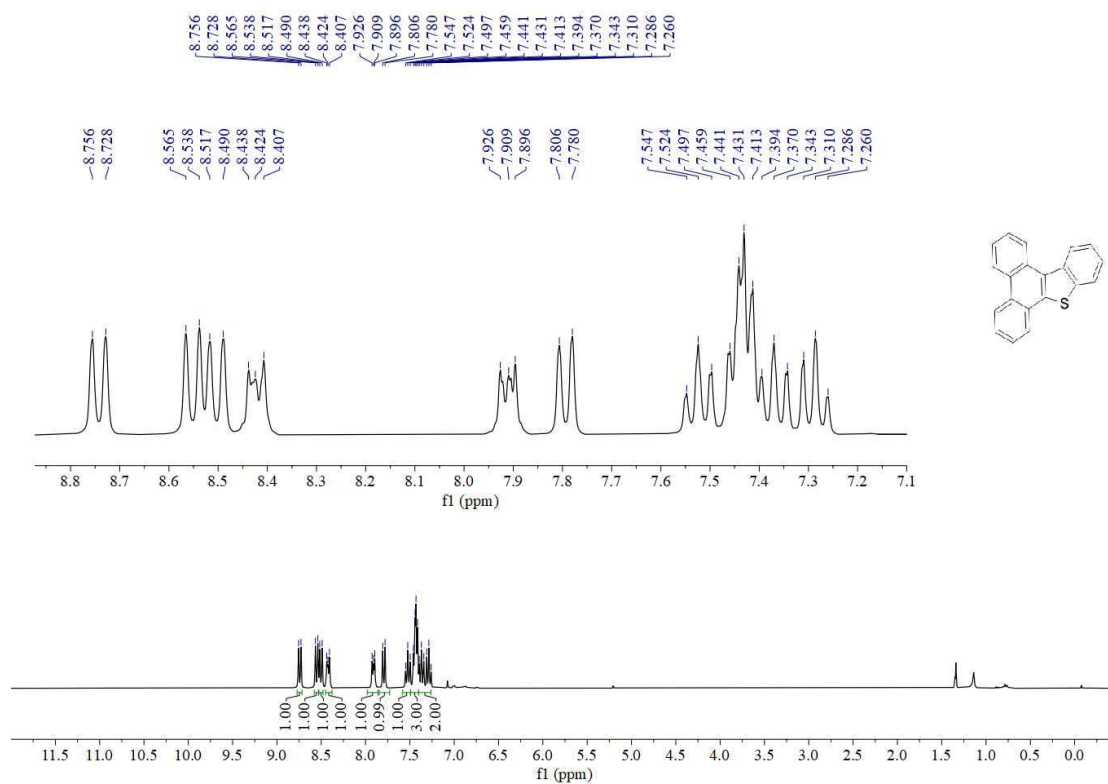

$^{13}\text{C}\{^1\text{H}\}$  NMR spectrum of **8a** in  $\text{CDCl}_3$  (75 MHz)

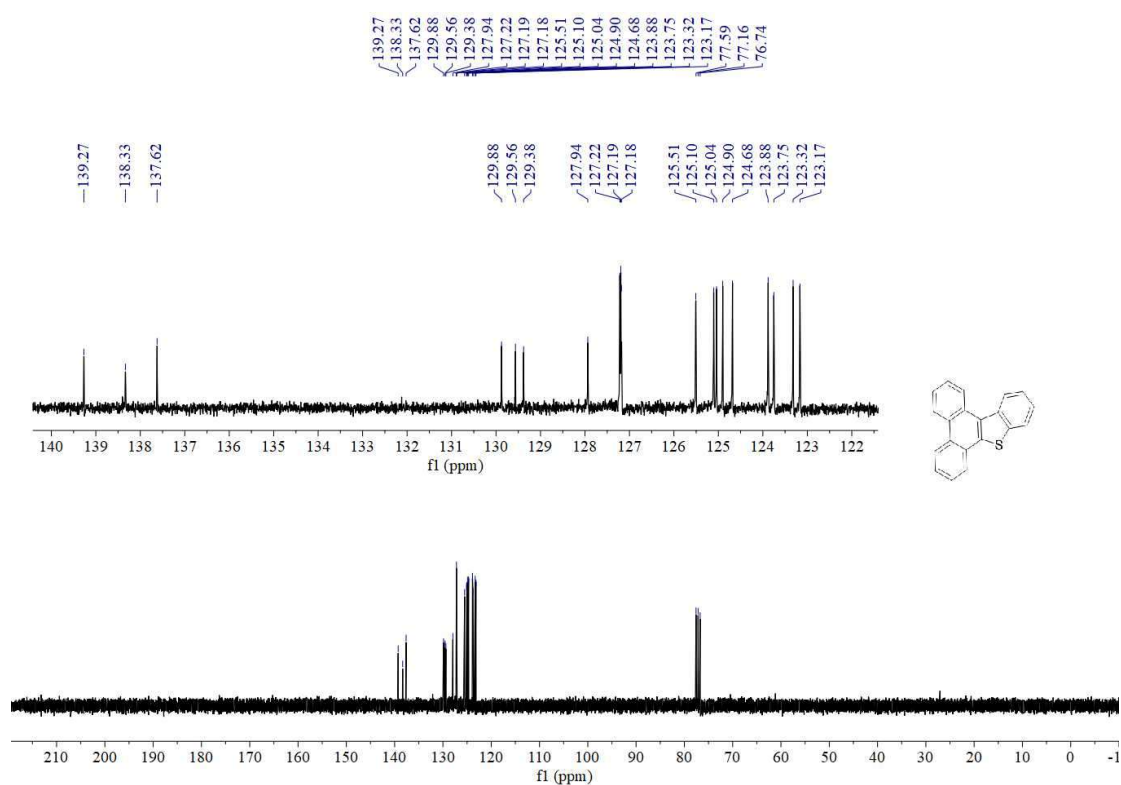

$^1\text{H}$  NMR spectrum of **8b** in  $\text{CDCl}_3$  (300 MHz)

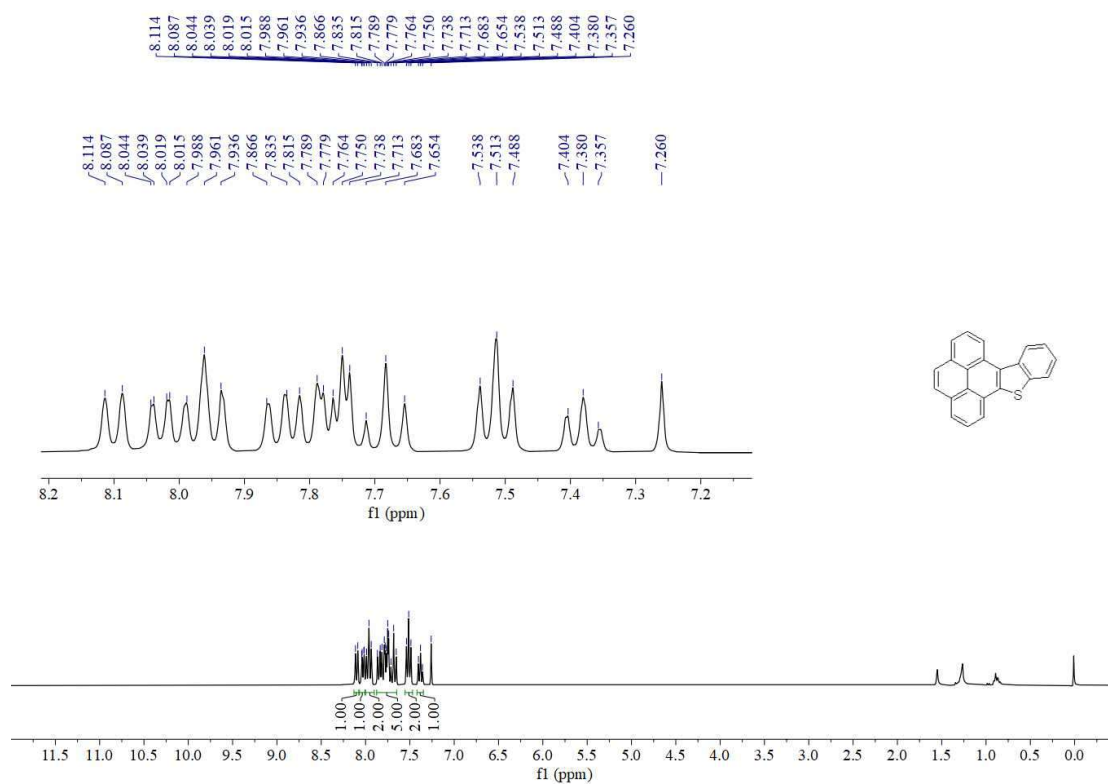

$^{13}\text{C}\{^1\text{H}\}$  NMR spectrum of **8b** in  $\text{CDCl}_3$  (75 MHz)

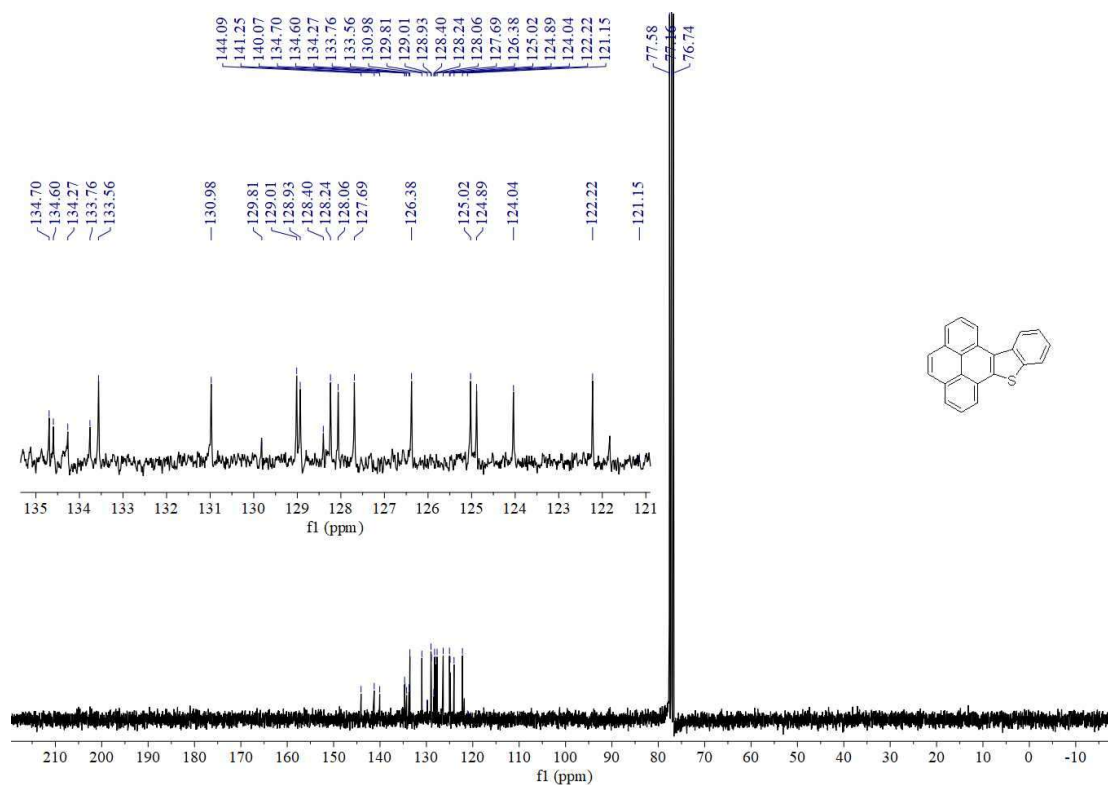



$^1\text{H}$  NMR spectrum of **9** in  $\text{CDCl}_3$  (300 MHz)

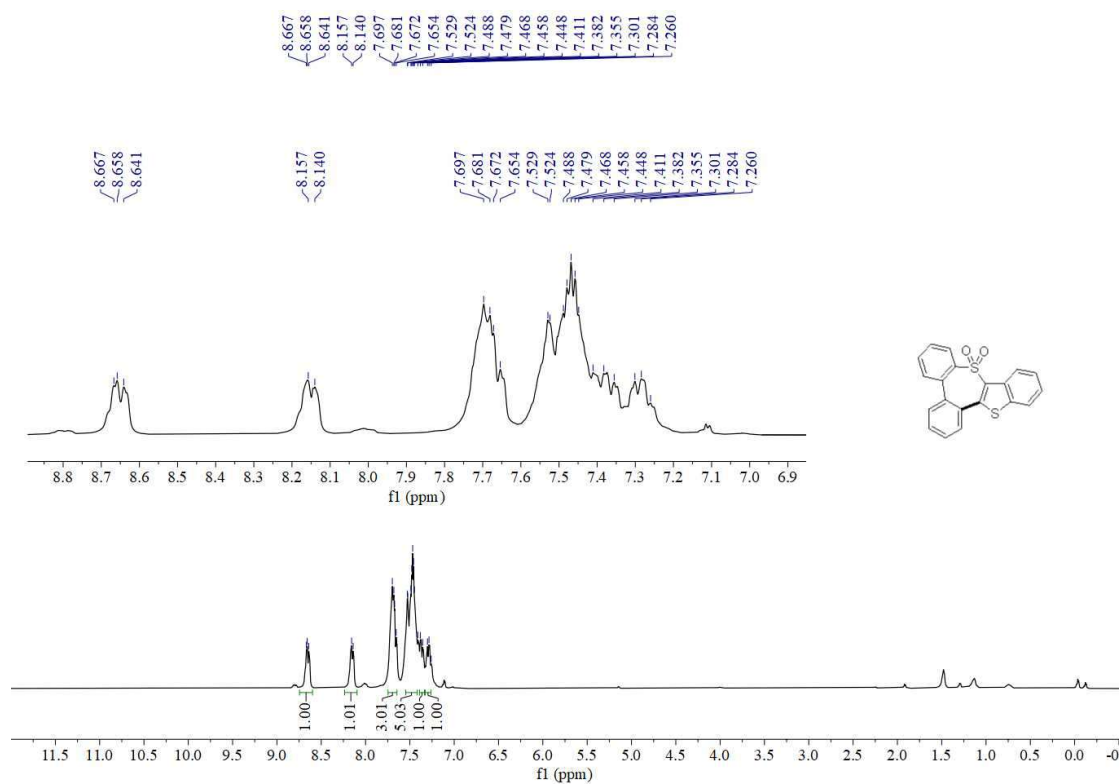

$^{13}\text{C}\{^1\text{H}\}$  NMR spectrum of **9** in  $\text{CDCl}_3$  (75 MHz)

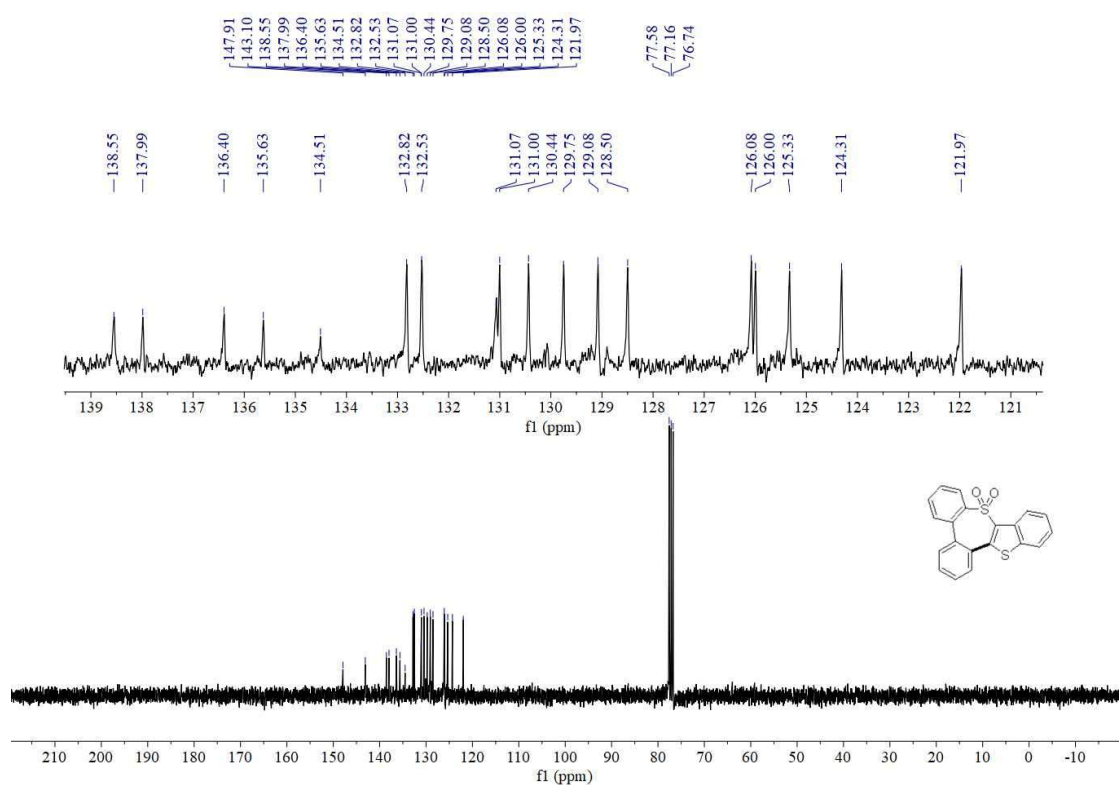

$^1\text{H}$  NMR spectrum of **10** in  $\text{CDCl}_3$  (300 MHz)

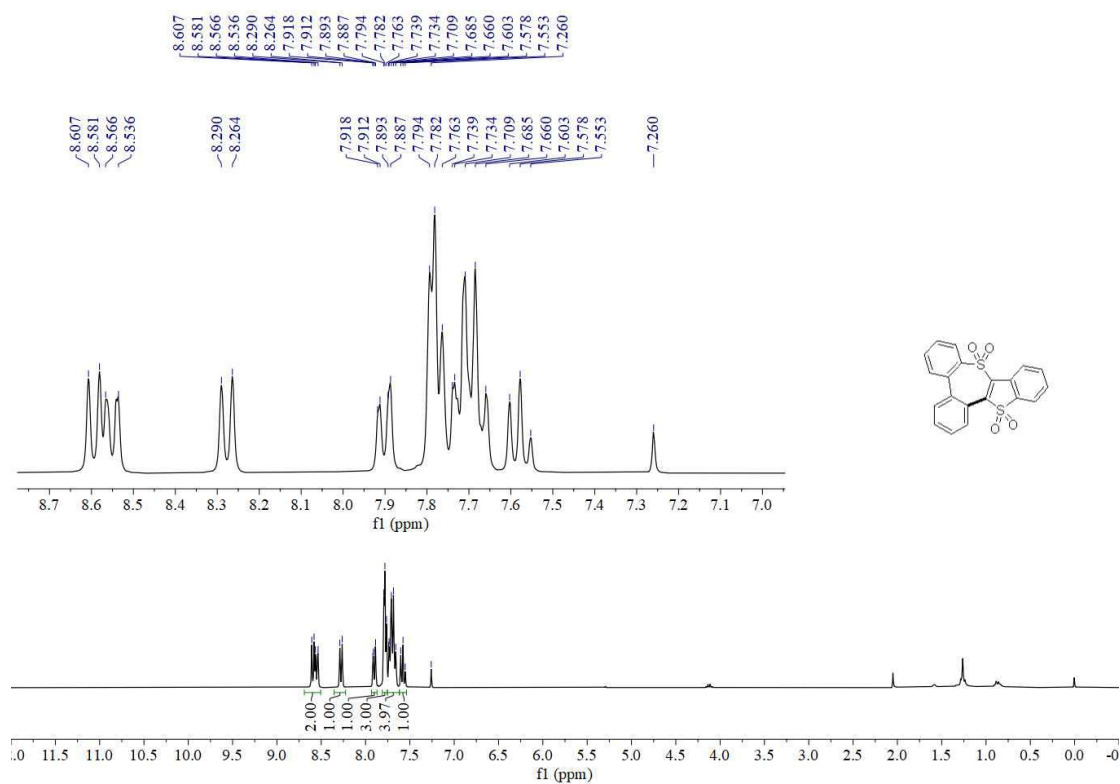

$^{13}\text{C}\{^1\text{H}\}$  NMR spectrum of **10** in  $\text{CDCl}_3$  (75 MHz)

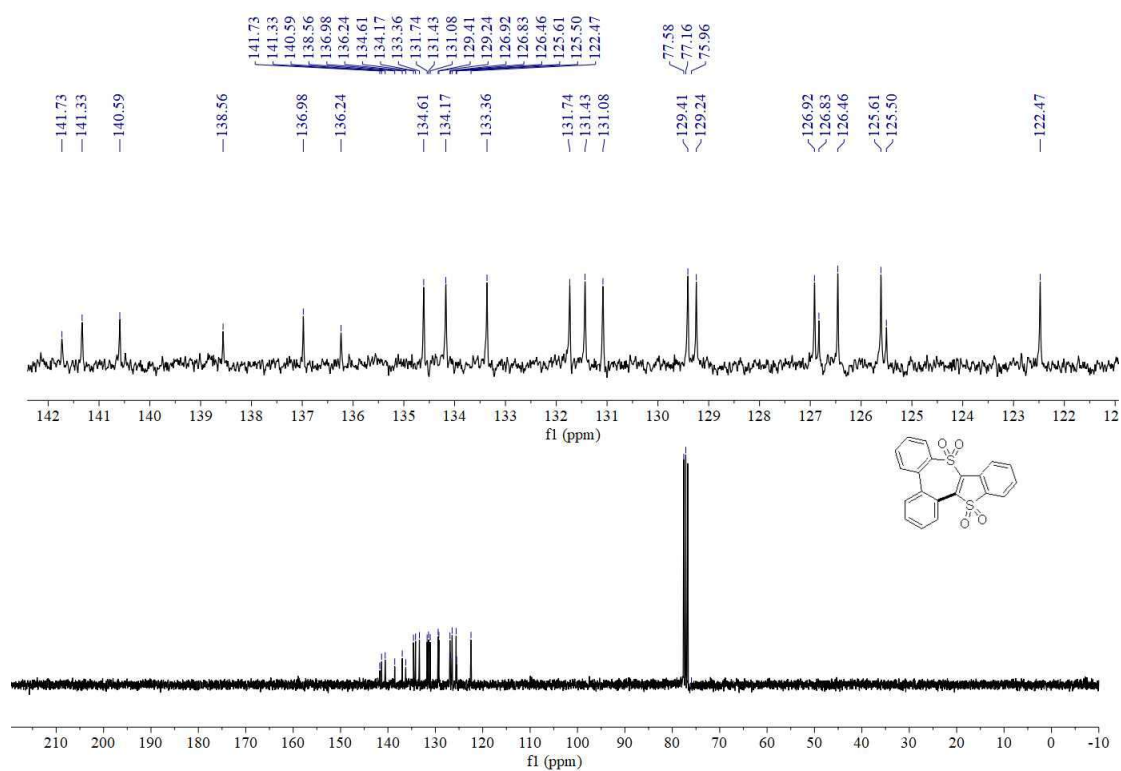

Supplement: d5sc08209a1.pdf [file d5sc08209a1.pdf]
